# Supplementary material
Source: Research Square preprint supplement (doi:10.21203/rs.3.rs-10134278/v1)
Supplement: Supplementary file 1 [file 6e50796321f6508924429c67.docx]

# SUPPLEMENTARY MATERIAL

# Supplementary note 1. Spectral flow cytometry for deep immunophenotyping

## 1.1 Panel summary

To comprehensively phenotype the peripheral immune landscape and identify circulating biomarkers of ICI response, a custom 30-parameter surface marker panel was designed for human PBMCs. The panel was specifically configured to achieve three technical objectives: (1) high-resolution identification of lymphoid and myeloid lineages; (2) functional characterization of cellular activation and exhaustion states; and (3) prioritized detection of rare myeloid-derived suppressor cells (MDSCs) and antigen-presenting cells (APCs). Because PBMCs from cancer patients exhibit distinct biological and morphological alterations compared to healthy donors, the panel and its subsequent gating strategy were heavily optimized to address the unique technical challenges posed by these clinical samples.

## 1.2 Panel design

The panel was designed following established principles for high-parameter flow cytometry, as outlined in best-practice guidelines for conventional cytometric approaches1. Antigens were categorized as primary, secondary, or tertiary based on expression levels, with co-expression patterns evaluated through schematic gating trees and literature reviews of marker distribution across target subsets. Leveraging commercially available fluorochrome-conjugated antibodies, an initial 26-colour panel was optimized for the BD FACSymphony A5 cytometer. This configuration successfully resolved key populations including T, B, NK cells, monocytes, and dendritic cell subset (Supplementary Fig. 1a).

Shortly after establishing the BD panel, the Cytek Aurora full-spectrum cytometer was acquired at the institute. The panel was migrated to this 5-laser platform to capitalize on the Aurora’s capabilities. To leverage the platform’s enhanced spectral resolution, the panel was expanded to a 30-parameter configuration with the addition of markers critical for resolving immunosuppressive myeloid subsets (CD15, CD33, CD11b, CD5), accompanied by the necessary repositioning of some antibodies.

A critical observation during panel validation involved significant signal spread from APC-Fire 810 (R8 channel, emission peak 807 nm) into the APC channel (R1 channel, emission peak 660 nm) after unmixing (Supplementary Fig. 1b), a phenomenon worthy of emphasis given its occurrence despite the Aurora’s advanced spectral resolution. Initial suspicions of tandem dye degradation were ruled out after testing fresh reagents, confirming inherent spectral proximity as the cause. Consequently, APC-Fire 810 was omitted, and antibody positions were further adjusted. Notably, fluorochromes with closer spectral proximity to APC—such as APC-H7 (R7 channel) and Alexa Fluor 647 (R2 channel)—did not exhibit comparable spread, underscoring the fluorochrome-specific nature of this interference. This finding highlights critical lessons: spectral overlap persists even in high-resolution full-spectrum systems post-unmixing, and interference patterns are fluorochrome-dependent rather than strictly proximity-driven. Such errors are easily overlooked without rigorous pairwise examination of all fluorochrome combinations, particularly when relying on automated spectral unmixing algorithms.

The finalized panel demonstrates an optical layout across the Aurora’s 5-laser spectral map, achieving a similarity index of 11.42, indicative of robust performance for a 30-colour configuration (Supplementary Table 1, Supplementary Fig. 2). Antibody clones were selected based on either their prevalence in published studies or manufacturer recommendations for clone-specific performance (Supplementary Table 2).

## 1.3 Panel optimization

### Reference control validation

Unmixing accuracy in full-spectrum cytometry critically depends on the spectral fidelity of reference controls. To address well-documented spectral shifts induced by cellular microenvironments2,3, parallel reference controls were initially generated using both UltraComp™ beads (Thermo Fisher Scientific) and human PBMCs stained individually with each antibody. A systematic comparison of unmixing results revealed that bead-based controls introduced significant unmixing errors for tandem dyes (BUV563, BV480, BV570, BV605, BV711, BV786, PE-Cy5, PE-Cy7) and proteinaceous fluorochromes (PE, PE-CF594, APC-R700). These spectral discrepancies manifested as false-positive populations in off-target channels (Supplementary Fig. 3). Consequently, cell-based reference controls utilizing healthy donor PBMCs were strictly adopted for all markers to ensure absolute spectral congruence between reference controls and experimental samples.

### Antibody Titration and Panel Validation

To ensure statistically robust gating of rare immune subsets (<0.1% frequency, including conventional dendritic cells and MDSCs), the assay was scaled to require a minimum of 5 × 10⁶ PBMCs per sample. Initial antibody titrations were performed on 1 × 10⁶ cells due to healthy donor PBMC limitations, with full-panel validation (on both healthy and patient PBMCs) subsequently confirmed across escalating cell counts (1–5 × 10⁶) to verify performance at scale. All titrations were performed in a 200 µL staining volume to mirror final panel conditions.

Each of the 30 reagents was titrated across eight two-fold dilutions. Starting concentrations were guided by manufacturer recommendations: standard reagents (e.g., BD Horizon™ antibodies) began at 1:20 dilution (10 µL in 200 µL), while high-volume reagents (e.g., PE-Cy5 anti-CD54, Alexa Fluor 647 anti-CD127) started at 1:5 (40 µL in 200 µL). For viability dye (Live Dead Blue™), a 1:250 dilution (exceeding the recommended 1:1000) was used as starting point to accommodate high cell counts, with accuracy validated using live/heat-killed cell mixtures. CD45 titration employed partial staining of PBMCs (50% stained, 50% unstained) given that nearly all PBMCs are CD45⁺. Optimal titers (red boxes in Supplementary Fig. 4) were selected by identifying the lowest antibody concentration maintaining clear positive/negative population separation, with stain index values serving as a quantitative reference.

Provisional titers for Live Dead Blue™ and CD45 (dashed boxes in Supplementary Fig. 4a and c), initially optimized for 1 × 10⁶ cells, required revision during clinical sample validation. Full-panel validation on healthy and cancer patient PBMCs (1–5 × 10⁶ cells) revealed patient-specific challenges, including elevated debris and CD45⁻ populations not observed in healthy PBMCs. To resolve this, CD45 and Live Dead Blue™ were re-titrated using 5 × 10⁶ cells under experimental conditions (no dead/live cell mixing, two additional washes), mirroring final assay workflows (Supplementary Fig. 5a-b). Additionally, cFluorB548_CD15, critical for PMN-MDSC identification (CD3⁻CD19⁻CD56⁻CD14⁻CD15⁺), required stringent optimization due to cFluorB548 (CD15⁺) spillover into BUV805 (CD14⁺) channel. Full-panel titration coupled with fluorescence-minus-one (FMO) controls determined that a 1:320 dilution optimally resolved CD15⁺ PMN-MDSCs while suppressing CD14⁺-associated background (Supplementary Fig. 5c).

Final validation of the fully stained samples—unmixed using single-stained reference controls prepared at their optimally titrated concentrations—confirmed the reliable resolution of all target subsets, including rare populations, in both healthy and patient PBMCs. Panel robustness was further demonstrated via an N×N matrix of 19 selected lineage markers in fully stained healthy donor PBMCs, confirming the clean resolution of lineage-defining and low-abundance populations (Supplementary Fig. 6). Ultimately, final titer selections (Supplementary Table 3) were established by balancing biological and technical considerations: (1) population-specific intensity requirements (e.g., monocyte versus lymphocyte markers), (2) spillover minimization in a high-dimensional context, and (3) clinical sample limitations regarding inherent viability and debris profiles.

## 1.4 Technical optimizations

### High-density sample acquisition

Data collection was standardized using a preconfigured Cytek Cloud template, with validation-optimized instrument settings applied uniformly across the cohort without modification. Due to the high cellular density required for rare population detection (5 × 106 cells per tube), continuous acquisition initially resulted in exceptionally large FCS files and prolonged acquisition times (>10 minutes per sample), which occasionally triggered instrument software pauses. To ensure continuous and stable cytometer performance and prevent data loss during the acquisition of high event counts, each stained sample was acquired sequentially across two separate data files within the acquisition software, processing approximately half of the sample volume per file.

### Spectral unmixing and autofluorescence extraction

To maximize spectral unmixing accuracy and mitigate inaccuracies associated with longitudinal cytometer drift, all single-color cell-based reference controls were freshly generated alongside the experimental cohort. Crucially, these refreshed controls utilized PBMCs from the identical healthy donor employed for longitudinal batch normalization, stained at validated optimal titers (1 × 10⁶ cells in a 200 µL volume). To minimize technical variance, the entire clinical cohort staining and reference acquisitions were completed within a strict three-week window under identical cytometer settings.

Furthermore, to address the pronounced inter-individual autofluorescence variability inherent to cancer patient PBMCs, a matched unstained control was acquired for every sample to enable precise, per-sample autofluorescence extraction. While this profound biological variance still yielded minor unmixing artifacts across the 154-sample cohort, all target immune subsets—including low-abundance dendritic cells and MDSCs—remained unequivocally resolvable. Consequently, the algorithmically unmixed data were retained intact, avoiding subjective, per-sample manual compensation adjustments.

## 1.5 Gating strategy

### Initial data cleanup and leukocyte identification

Initial assessment of forward scatter (FSC) and side scatter (SSC) revealed significant morphological discrepancies between healthy donor and patient PBMCs (Supplementary Fig. 7a). Patient samples were frequently characterized by the pronounced expansion of a low-SSC, predominantly CD45⁻ population (Subset A). While this debris population cleanly separates from leukocytes in healthy PBMCs, it exhibited continuous morphological overlap with the viable PBMC population in patient samples (Supplementary Fig. 7b). This lack of discrete boundaries precluded the reliable use of standard scatter-based debris exclusion without risking the inadvertent loss of viable leukocytes.

Furthermore, patient samples uniquely contained a high-SSC, CD45low/high, CD15+ population (Subset B; Supplementary Fig. 7a). This phenotype is consistent with low-density neutrophils, which are known to co-purify with the mononuclear fraction during density gradient centrifugation4 and represented a deliberate biological target within the panel design.

Consequently, conventional FSC/SSC-based initial gating (Supplementary Fig. 7c)—which would inherently exclude the high-SSC low-density neutrophils (Subset B) and risk misclassifying overlapping cells near the debris field (Subset A)—was circumvented. Instead, a marker-driven hierarchical gating strategy was implemented. Single cells were first isolated using forward scatter height versus area (FSC-H vs. FSC-A), followed immediately by dead cell exclusion (Live Dead Blue⁻). Finally, a comprehensive CD45⁺ gate was applied to accurately capture all viable leukocytes (Supplementary Fig. 7d). This sequence effectively retained the high-SSC neutrophil populations of interest while definitively excluding the overlapping CD45⁻ debris.

### T cells

Within the viable CD45+ population, target subsets were identified using sequential gating (Supplementary Fig. 8). Major lymphoid lineages were first delineated into CD3⁺ T cells and CD19⁺ B cells. The T cell compartment was subsequently segregated into γδ and αβ T cells, with the αβ subset further partitioned into major CD4⁺ and CD8+ lineages (Supplementary Fig. 8a). Given the surface-only assay design, regulatory T cells (Tregs) were defined as CD4⁺CD25hiCD127lo/-,serving as an established extracellular proxy for intracellular FoxP3 expression5.

While CD127 was initially included to further delineate naïve/memory (CD127⁺) from effector (CD127⁻) T cells, its surface expression profile proved technically unstable across longitudinal batch controls (identical healthy donor PBMCs), precluding the reliable binary separation of these populations (Supplementary Fig. 9a). Consequently, to maintain rigorous gating standardization across the cohort, CD127 was utilized exclusively for Treg identification and omitted from broader downstream T cell subsetting.

### NK cells

NK cells were identified within the CD3⁻CD19⁻ lymphoid fraction based on broad CD56 expression (Supplementary Fig. 8b). Subsequent evaluation of CD16 (FcγIII) stratified the NK cell compartment into functionally distinct CD16bright (predominantly cytotoxic) and CD16low/− (predominantly cytokine-producing) subsets, consistent with established classifications6. To account for pronounced inter-individual biological variability in CD16 expression intensities across the clinical cohort, a standardized, fixed gating threshold was established and applied uniformly to ensure the objective and reproducible segregation of these subsets (Supplementary Fig. 10a).

### Low-density neutrophils (LDNs)

Following the exclusion of CD3⁺ T, CD19⁺ B, and CD56⁺ NK cells, the residual CD3⁻CD19⁻CD56⁻ fraction (NonTBNK) is conventionally partitioned by HLA-DR to delineate monocytes and dendritic cells (DCs). However, prominent high-SSC events in patient samples systematically obscured the true HLA-DR⁺/⁻ boundary (Supplementary Fig. 10b left). These events correspond to low-density neutrophils (LDNs), which aberrantly co-purify with the mononuclear fraction in pathological states 4.

To prevent these cells from distorting the identification of classical antigen-presenting cells (APCs), CD15high LDNs were systematically identified and separated from CD14⁺ cells utilizing CD14 vs. CD15 biaxial gating prior to HLA-DR assessment (Supplementary Fig. 8c, Supplementary Fig. 10b middle). The LDN phenotype was further confirmed by their high SSC profile, uniform CD11b positivity, and CD33dim expression (Supplementary Fig. 10b right).

While a subset of these LDNs exhibited non-canonical HLA-DR expression—suggestive of documented APC-like plasticity 7—their upstream exclusion was methodologically imperative to isolate canonical mononuclear APCs. This targeted removal of CD15+ LDNs yielded a clean, residual fraction (designated NonTBNKneu) that permitted the unambiguous downstream resolution of HLA-DR+ and HLA-DR− mononuclear subsets without interference (Supplementary Fig. 10b).

### Dendritic cells

While conventional dendritic cell (DC) gating strategies typically exclude CD14⁺ events, recent single-cell evidence demonstrates CD14 expression within specific DC subsets8,9. To capture these populations, CD14⁺ events were retained, and DCs were identified directly within the HLA-DR⁺ lineage-negative (CD3⁻CD19⁻CD56⁻CD15⁻) compartment (Supplementary Fig. 8d). Plasmacytoid DCs (pDCs) were first identified as CD123⁺CD11c⁻. The remaining CD11c⁺ antigen-presenting cells (APCs)—encompassing both conventional DCs (cDCs) and monocytes—were subsequently isolated. Due to continuous and highly variable CD11c expression profiles across patient samples, a standardized, uniform CD11c gating threshold was applied across the cohort to ensure reproducible subsetting (Supplementary Fig. 10c).

Within the CD11c⁺ APC fraction, biaxial gating of CD141 and CD1c delineated cDC1 (CD141⁺) and cDC2 (CD1c⁺) subsets (Supplementary Fig. 8d). While recent literature characterizes a CD14⁺CD5⁻ "DC3" population within the broader cDC2 compartment9,10, this specific subset was omitted from downstream analysis. This decision was driven by the observed longitudinal instability of CD14 expression within cDC2s across healthy batch controls (Supplementary Fig. 9b, upper panels), coupled with highly dysregulated and heterogeneous CD14/CD5 co-expression profiles uniquely present in the patient cohort (Supplementary Fig. 9b, lower panels), which collectively precluded reliable DC3 boundary definition.

Within the cDC2 compartment, CD5⁺ cDC2s were evaluated due to their emerging role in anti-tumour immunity11,12. While these cells are classically characterized as CD14⁻ (distinct from the DC3 population), the inability to definitively exclude DC3s necessitated gating the CD5⁺ subset directly from the total cDC2 pool. To account for continuous CD5 expression, matched intra-sample B cells—which naturally comprise distinct CD5⁻ and CD5⁺ populations13-15—were leveraged as internal calibrators to establish objective CD5 gating thresholds (Supplementary Fig. 10d). Notably, despite being quantified from the unpartitioned cDC2 pool, the resulting CD5⁺ cDC2s were predominantly CD14⁻, remaining biologically consistent with classical DC2 phenotypes.

### Monocytes

Monocytes were identified within the HLA-DR+ NonTBNKneu compartment. Because overlapping marker expression precluded the reliable exclusion of dendritic cells via standard sequential gating, a Boolean subtraction strategy (FCS Express) was utilized. By logically subtracting the previously defined pDC, cDC1, and cDC2 populations from the parental gate, strict mutual exclusivity between the DC and monocyte lineages was guaranteed. The resulting purified monocyte pool was subsequently resolved into classical (CD14⁺⁺CD16⁻), intermediate (CD14⁺CD16⁺), and nonclassical (CD14⁻CD16⁺) subsets using standard CD14 vs. CD16 biaxial gating (Supplementary Fig. 8e).

### Myeloid-derived suppressive cells (MDSCs)

Consensus guidelines broadly categorize MDSCs into polymorphonuclear (PMN-MDSC; CD11b⁺CD14⁻CD15⁺) and monocytic (M-MDSC; HLA-DRlow/−CD11b⁺CD14⁺CD15⁻) subsets16,17. In our analysis, the canonical PMN-MDSC phenotype perfectly aligns with the low-density neutrophil (LDN) population systematically isolated upstream in our gating strategy (Supplementary Fig. 8c). Because surface immunophenotyping of the PBMC layer confirms low-density granulocytic identity but cannot definitively prove immunosuppressive function 4, we conservatively retained the nomenclature "LDNs" for this CD15⁺ population to avoid overinterpretation, deliberately separating them from HLA-DR-dependent gating.

To identify M-MDSCs, we evaluated the HLA-DRlow/− compartment within the CD15-excluded NonTBNKneu fraction (Supplementary Fig. 8f). However, analysis of standardized batch controls revealed substantial pre-analytical variability in CD14 expression specifically within this HLA-DRlow/− compartment. Unlike classical HLA-DR⁺ monocytes, which maintained robust and stable CD14 expression, the HLA-DRlow/− fraction frequently exhibited an unresolvable continuum of CD14 expression ranging from low to high intensity (Supplementary Fig. 10e). To ensure analytical reproducibility and avoid arbitrary CD14 boundary placement, all CD11b⁺⁺ events within the HLA-DRlow/− compartment were analysed collectively. The CD11b threshold was objectively calibrated at the transition zone between CD11b⁺⁺ cells (which captured the full continuum of CD14⁺ events) and CD11binter cells (which were exclusively CD14⁻). Because this inclusive approach inherently captures both CD14⁺ and CD14⁻ subsets, this population was conservatively designated under the broader term "MDSCs" rather than strictly "M-MDSCs".

### Functional and activation markers

Following the identification of all cellular subsets, functional and activation markers (PD-1, PD-L1, CTLA-4, LAG-3, CD69, CD64, CD54, CCR4) were assessed within defined populations. Due to continuous expression patterns without clear, objective positive/negative thresholds (Supplementary Fig. 11), discrete gating (e.g., PD-1⁺ CD8⁺ T cells) was infeasible. Instead, functional marker expression was quantified using arcsinh-transformed median fluorescence intensity (arcsinh-MFI).

### Summary of analytical strategy

Collectively, this manual gating framework was explicitly tailored to address the profound phenotypic dysregulation inherent to cancer patient PBMCs, prioritizing biological fidelity over rigid theoretical definitions. Notably, while automated high-dimensional clustering was initially evaluated for global population discovery, the extreme heterogeneity of patient PBMCs resulted in biologically discordant resolution across the full parameter space. Consequently, this expert-guided manual framework was utilized to ensure robust population tracking across the multi-batch cohort. Automated clustering was strictly reserved for targeted downstream analyses within manually pre-gated, biologically coherent compartments (e.g., isolated T cell or NonTBNK lineages) to prevent algorithm-induced artifacts.

# Supplementary figures and tables

Supplementary Fig. 1 |Initial 26-colour panel and identified issues during panel development


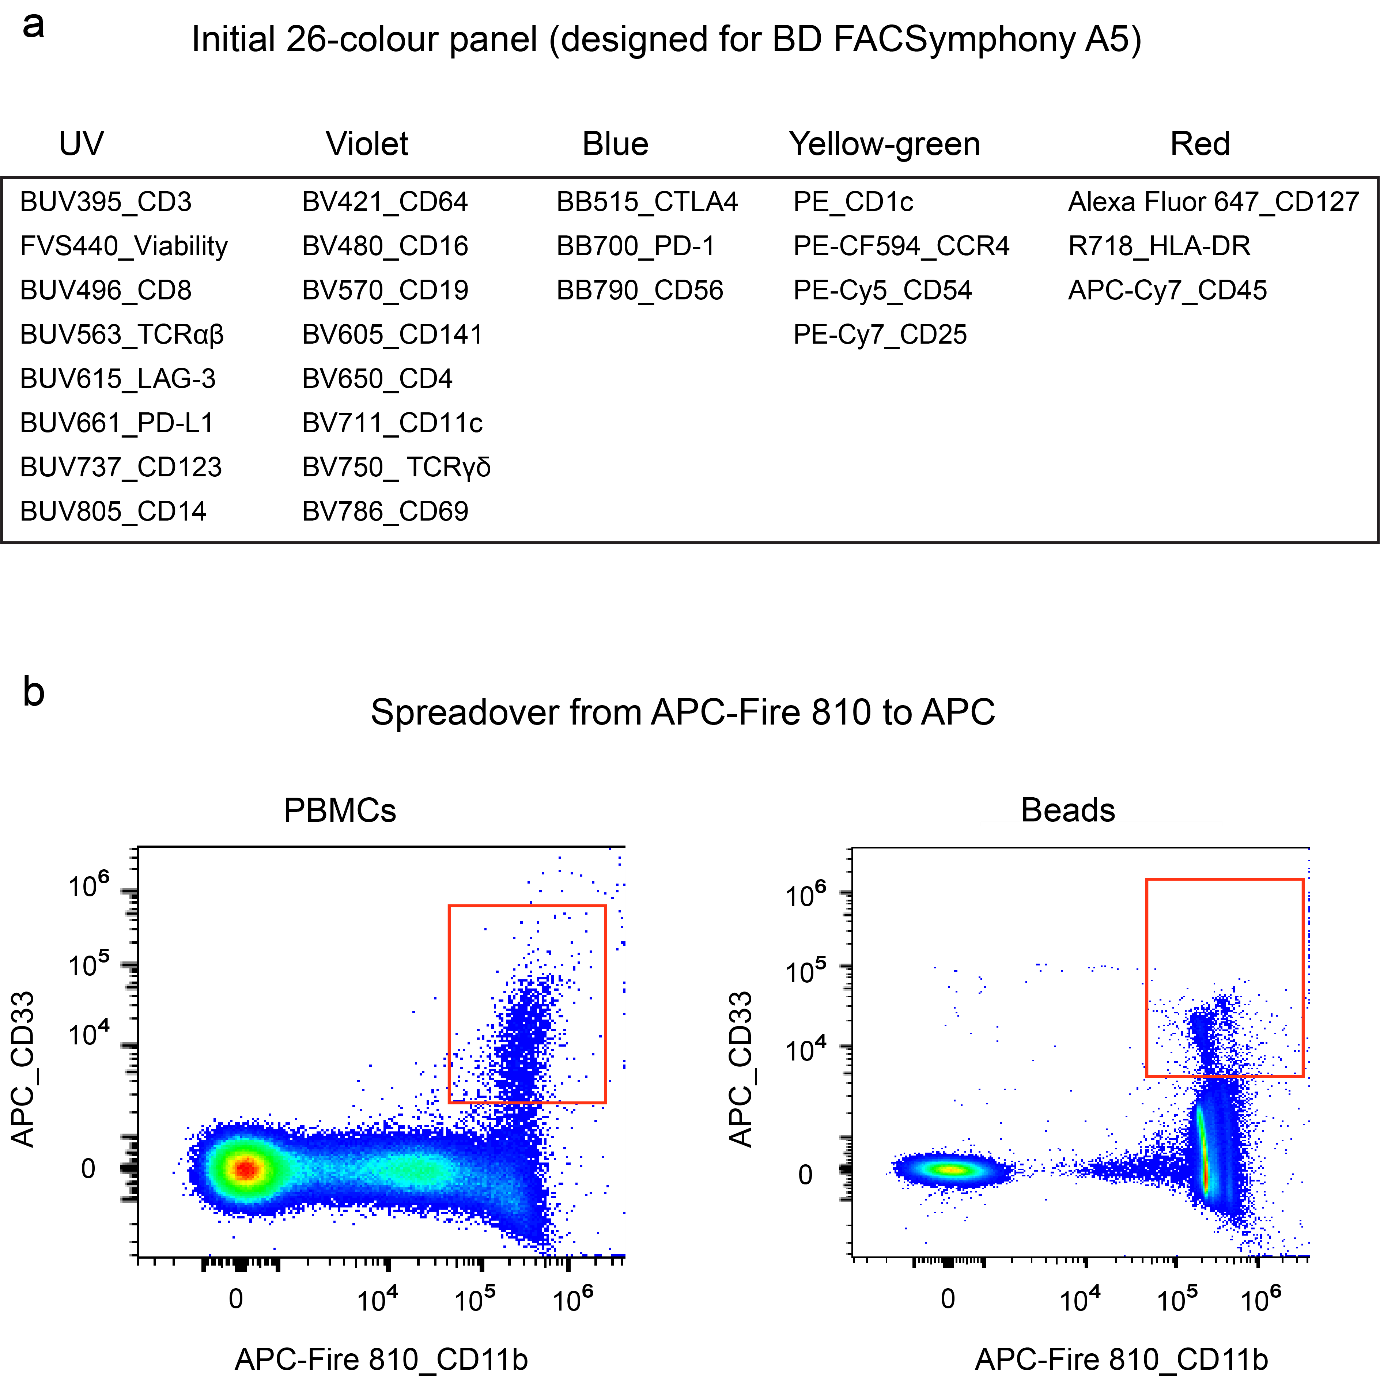


**Supplementary Fig. 1 |** **Initial 26-colour panel and identified issues during panel Development.**

**a**, The initial 26-colour panel used on the BD FACSymphony A5. **b**, On the Spectral cytometer Aurora, persistent signal spread from APC-Fire 810 (R8, emission peak 807 nm) into the APC (R1, emission peak 660 nm) channel observed after unmixing. This effect was detected in both PBMCs (left) and beads (right).

## Supplementary Fig. 2 | Panel similarity index generated by Cytek Full Spectrum Viewer


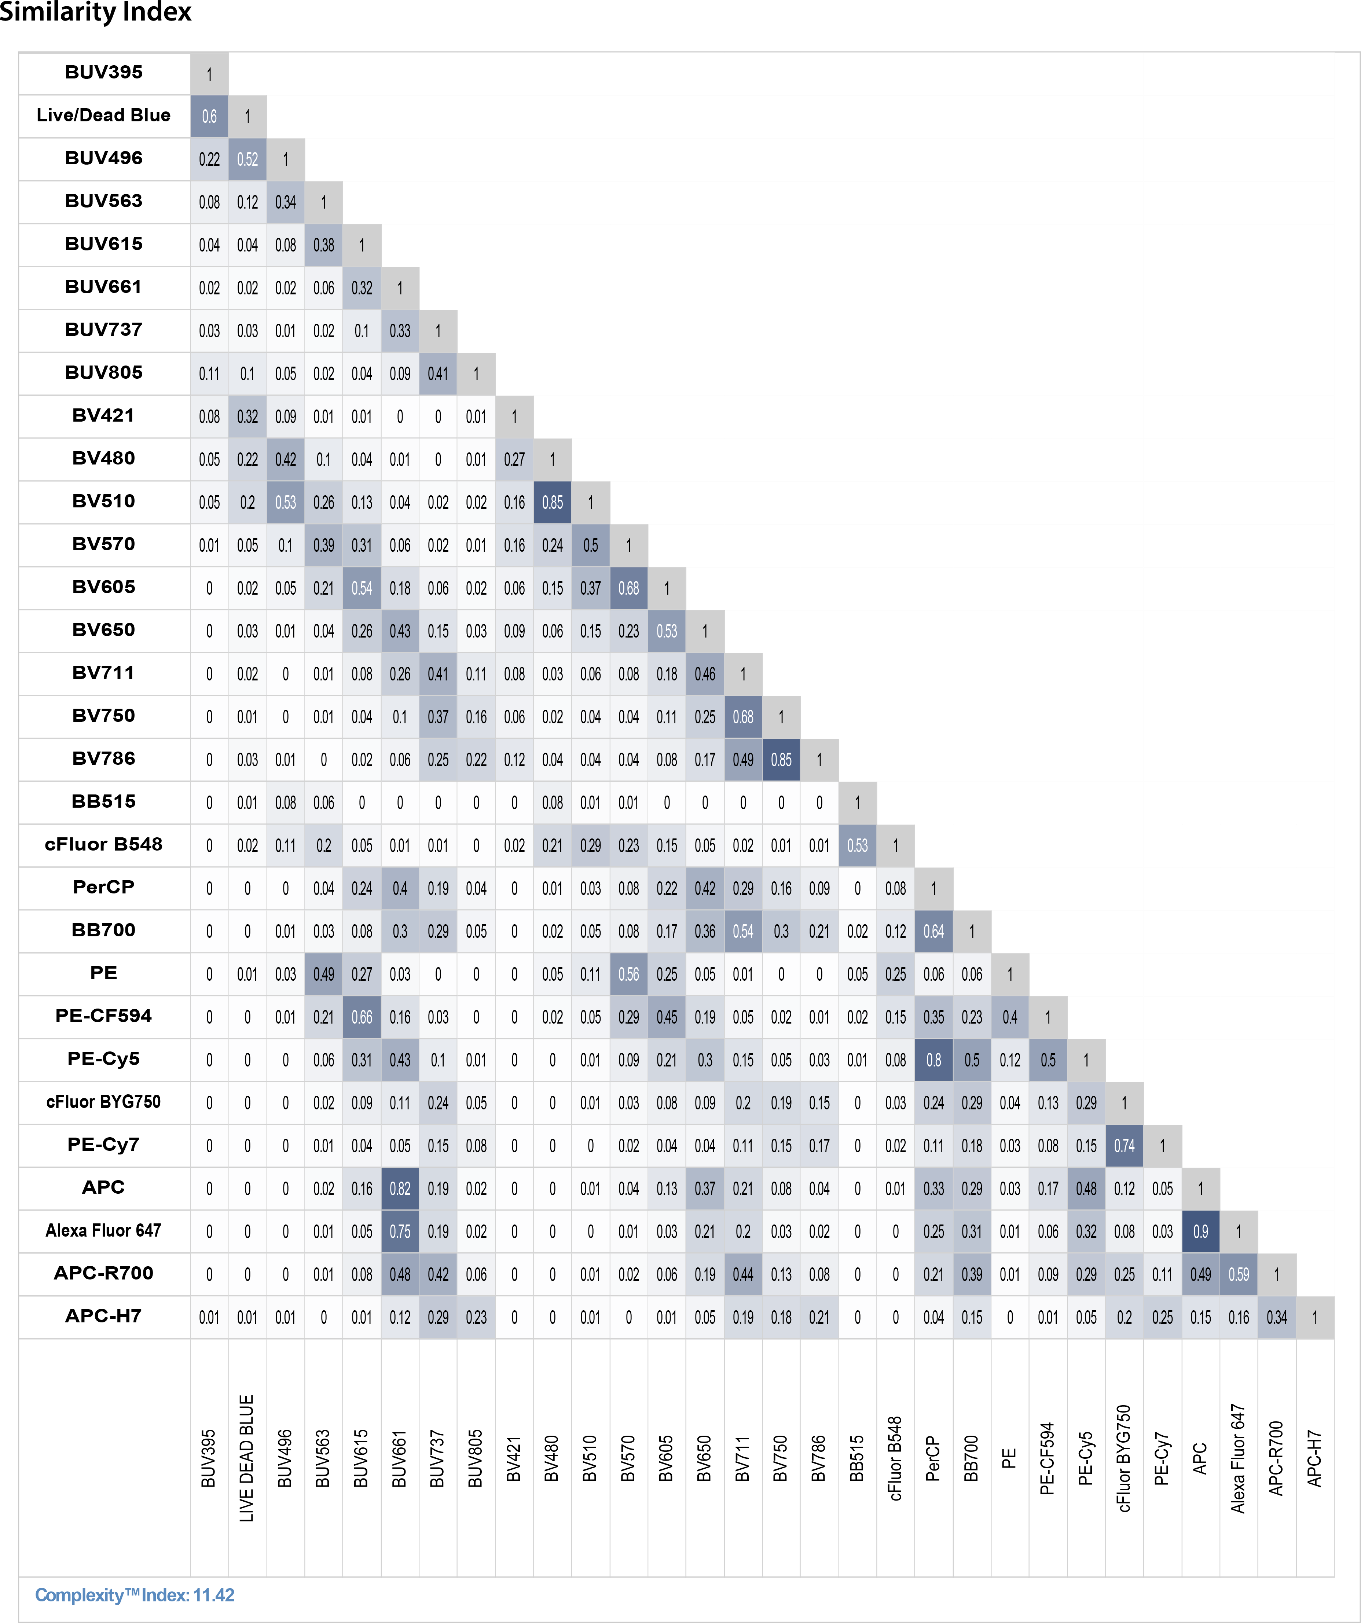


**Supplementary Fig. 2** **| Panel similarity index generated by Cytek Full Spectrum Viewer.**

The matrix presents the Similarity Index values, which quantify the spectral similarity between pairs of fluorochromes used in the study panel. A value of 1 denotes near-identical spectral profiles, indicating high overlap, while a value of 0 reflects completely distinct spectra. Numerical values are shown for each fluorochrome pair included in the panel. The complexity index, shown at the bottom of the matrix, represents a metric to evaluate the overall spectral complexity of the panel, with higher values indicating greater potential for spectral overlap.

## Supplementary Fig. 3 | Example of unmixing error when using beads as reference controls


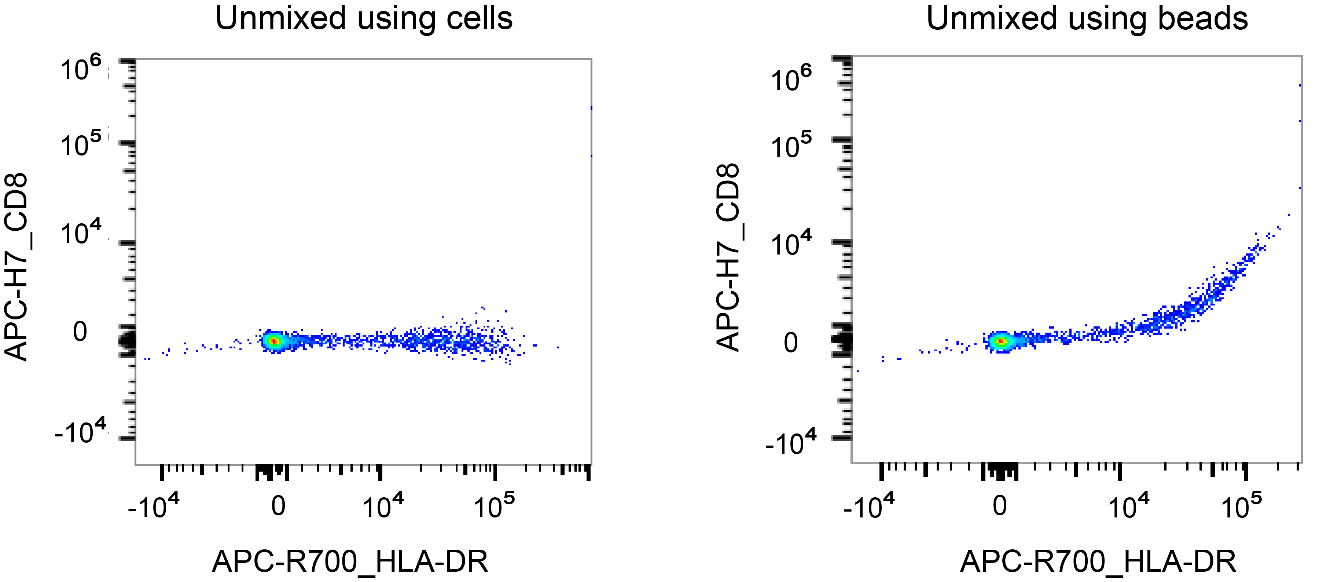


**Supplementary Fig. 3** **| Example of unmixing error when using beads as reference controls.**

Comparison of unmixing accuracy using different reference controls for APC-R700_HLA-DR. (Left) Unmixing performed using cell-based controls shows no inaccuracies in the APC-H7 channel. (Right) Unmixing using bead-based reference controls results in signal spillover into the APC-H7 channel, demonstrating an unmixing error.

## Supplementary Fig. 4 | Antibody reagent titration


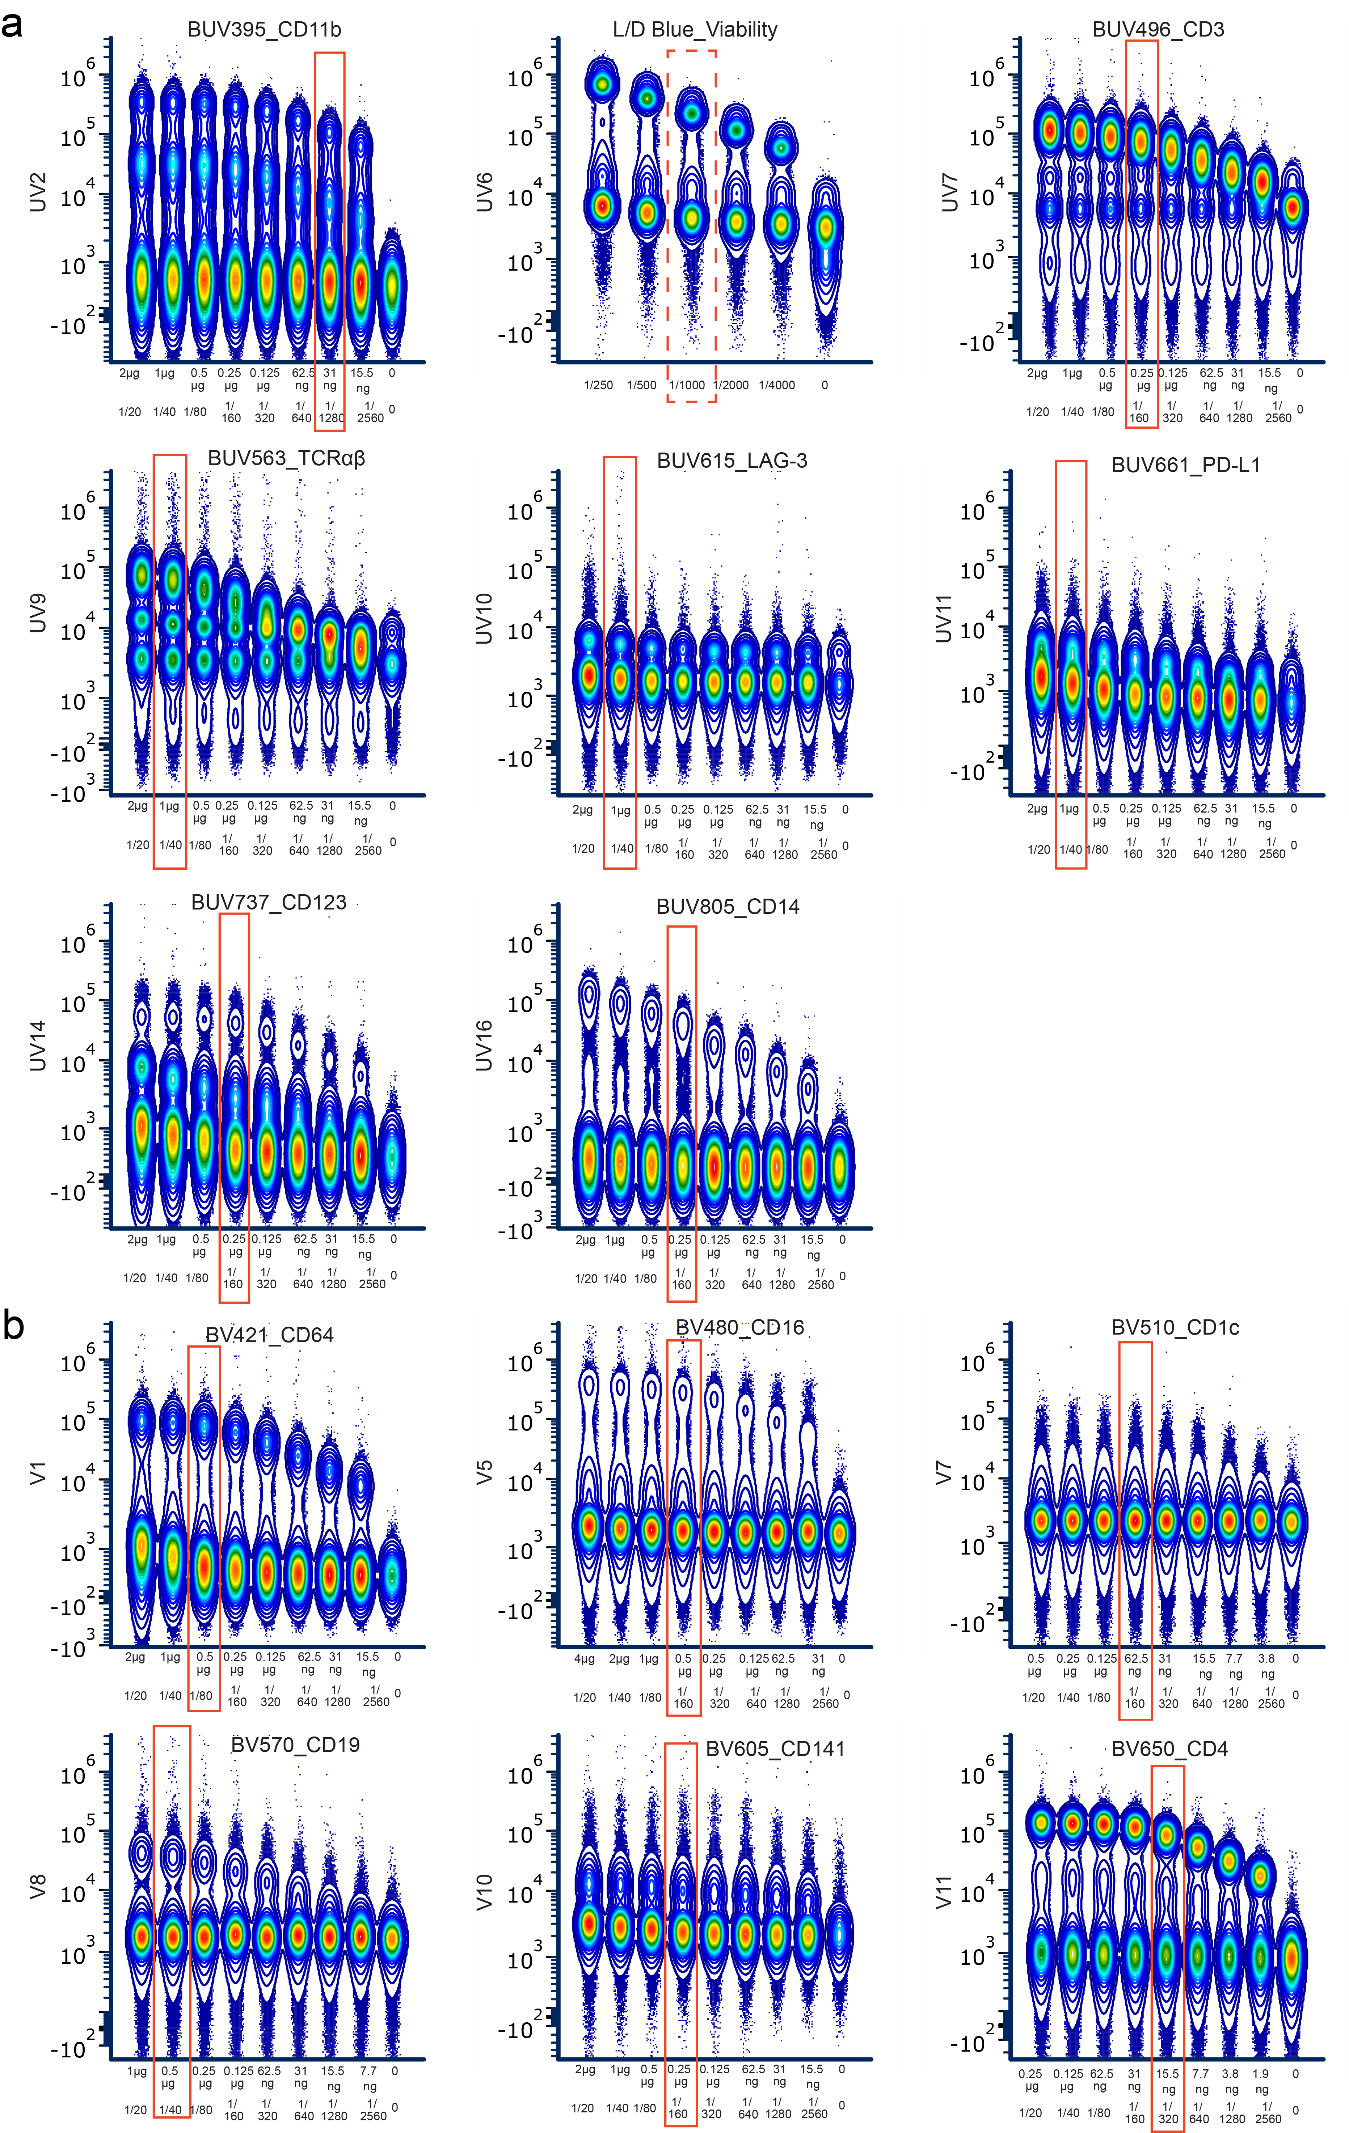


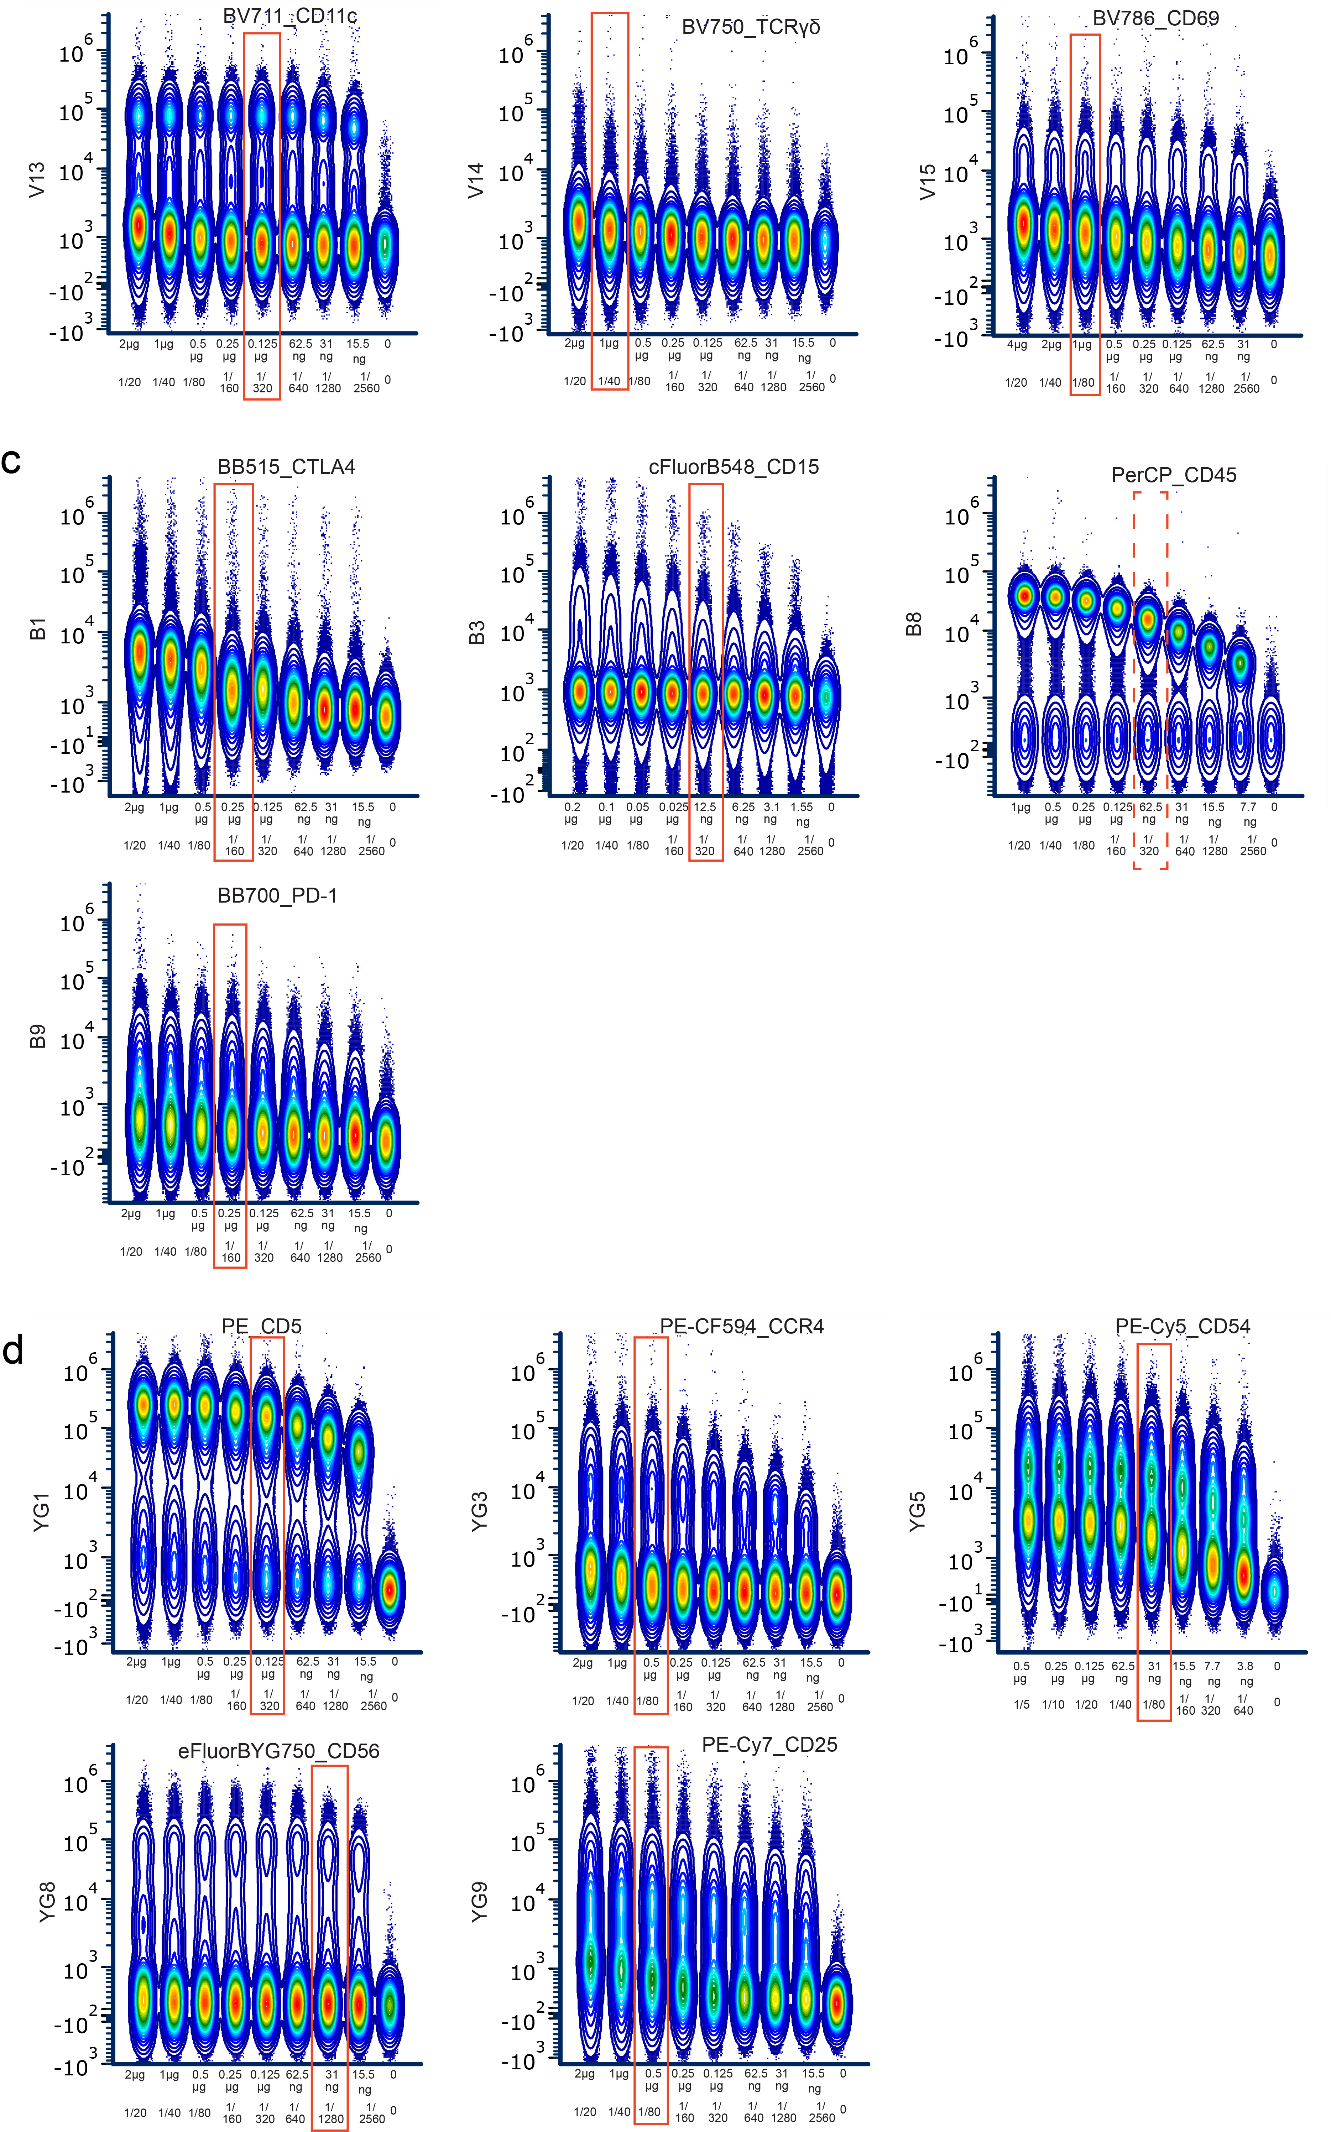


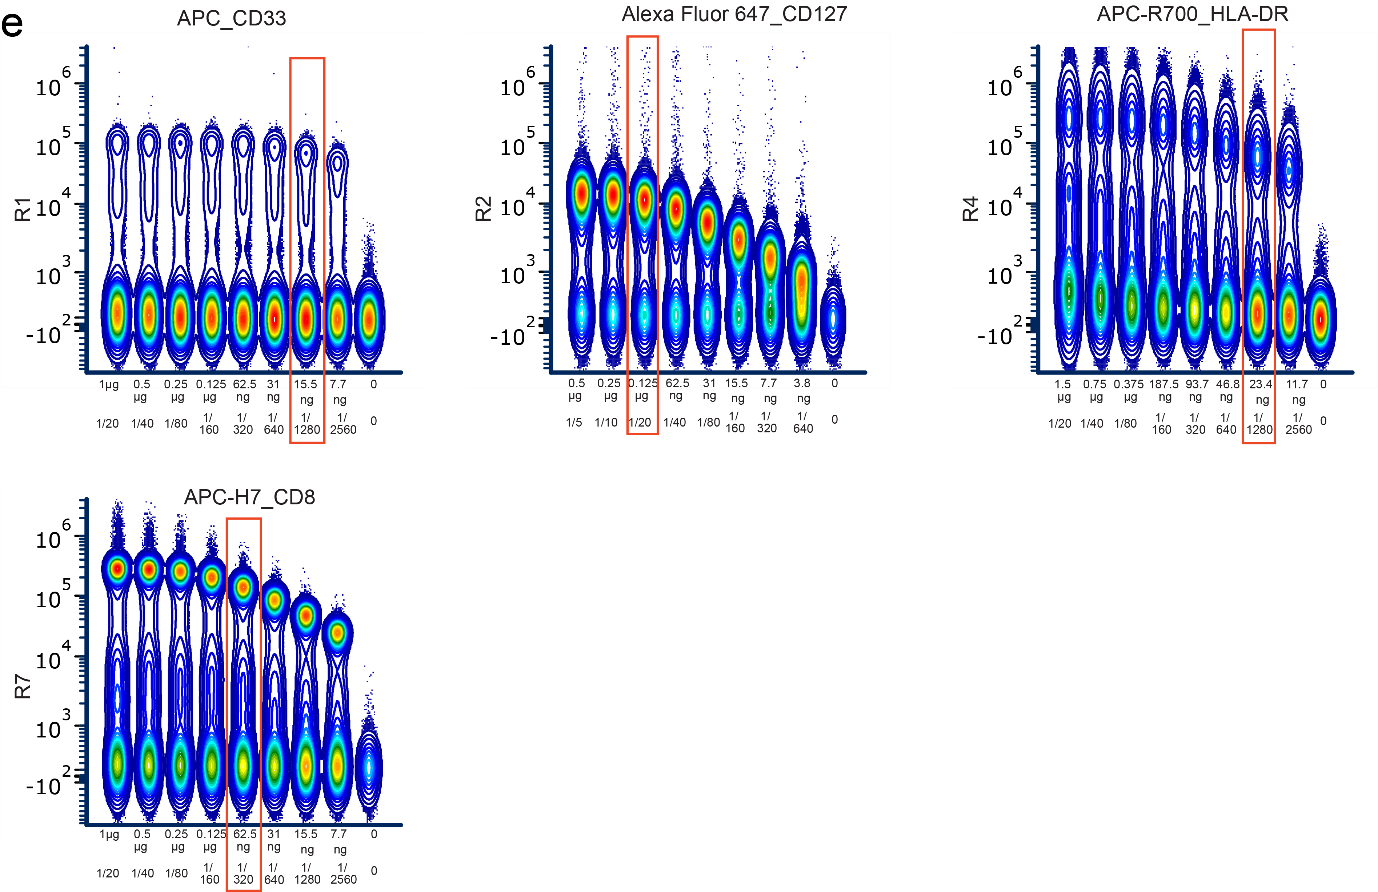


**Supplementary Fig. 4** **| Antibody reagent titration**

All reagents were titrated using 1 × 106 cells in a 200µL staining volume, with two-fold dilutions tested. The dilution range is described in the text. Antibody mass and dilution factors are shown on the x axis. Titrations for reagents primarily excited by the UV laser (355 nm) are shown in (**a**), violet laser (405 nm) in (**b**), blue laser (488 nm) in (**c**), yellow laser (561 nm) in (**d**), and red laser (640 nm) in (**e**). The optimal concentration of each reagent is indicated by the red box. Note that the concentrations for Live Dead Blue and PerCP_CD45 were not the final ones used, as indicated by dashed red boxes.

## Supplementary Fig. 5 | Re-titration of three markers in the full panel after panel testing


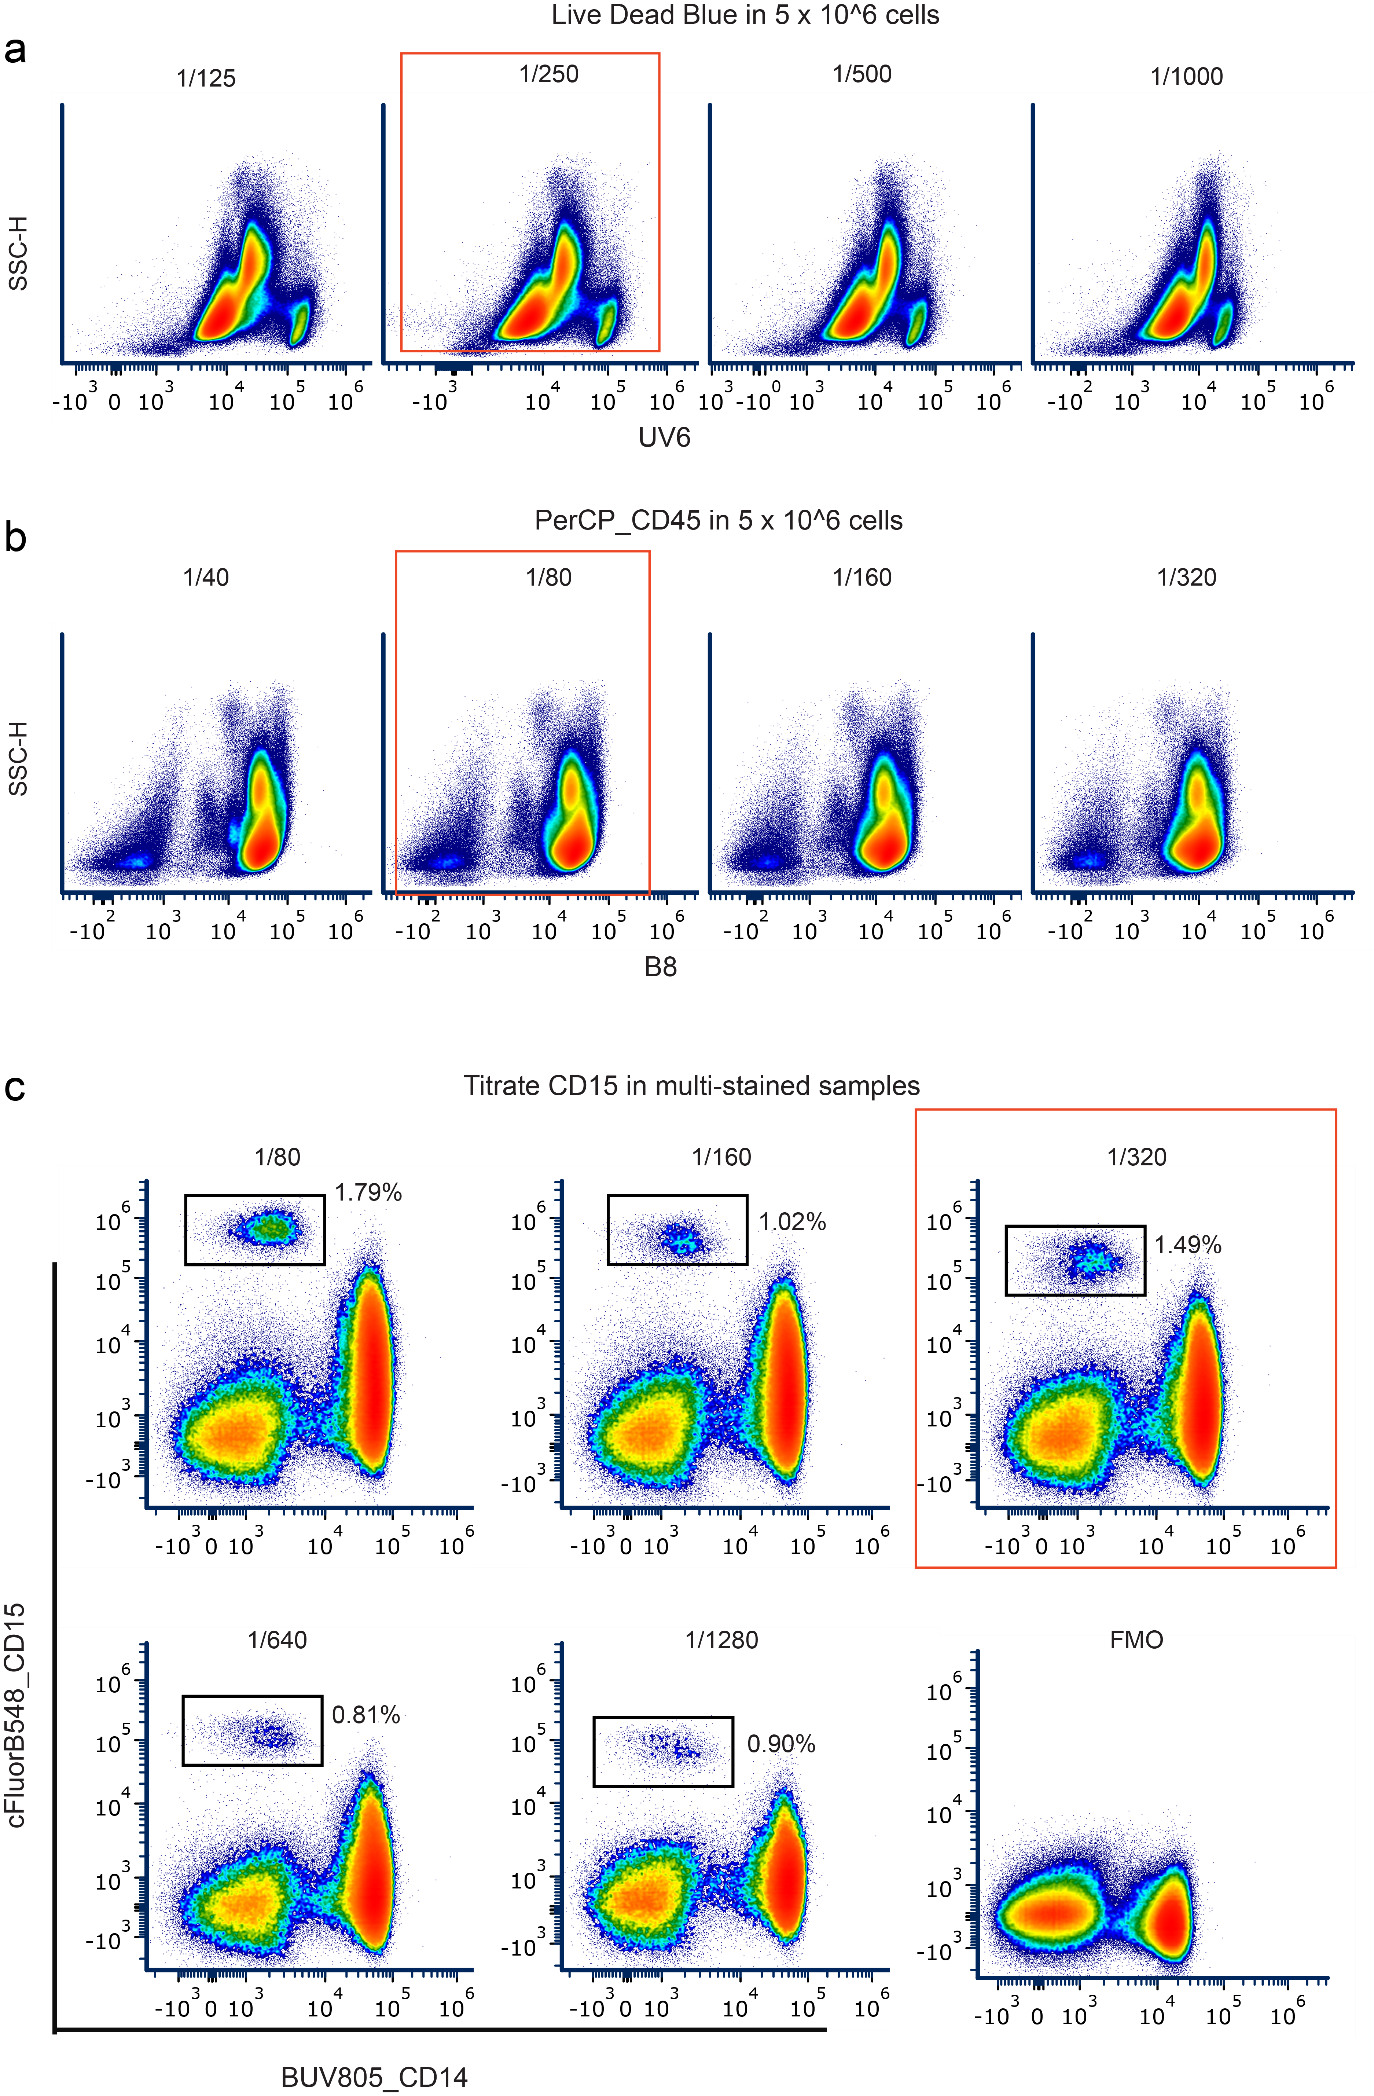


**Supplementary Fig. 5** **| Re-titration of three markers in the full panel after panel testing**

**a**-**b**, Re-titration of Live Dead Blue (**a**) and PerCP_CD45 (**b**) at 5 × 106 cells without mixing dead or unstained cells, simulating conditions of the final experiments. The concentrations chosen for the final experiments are indicated in the red box. **c**, Titration of CD15 in a scaled-down panel. The populations shown are unmixed, with each plot displaying CD45⁺CD3⁻CD19⁻CD56⁻ cells. The dilution of 1:320 was selected for final experiment (indicated by the red box).

Supplementary Fig. 6 | Panel robustness assessed by an N×N matrix of 19 lineage markers in one healthy donor PBMCs


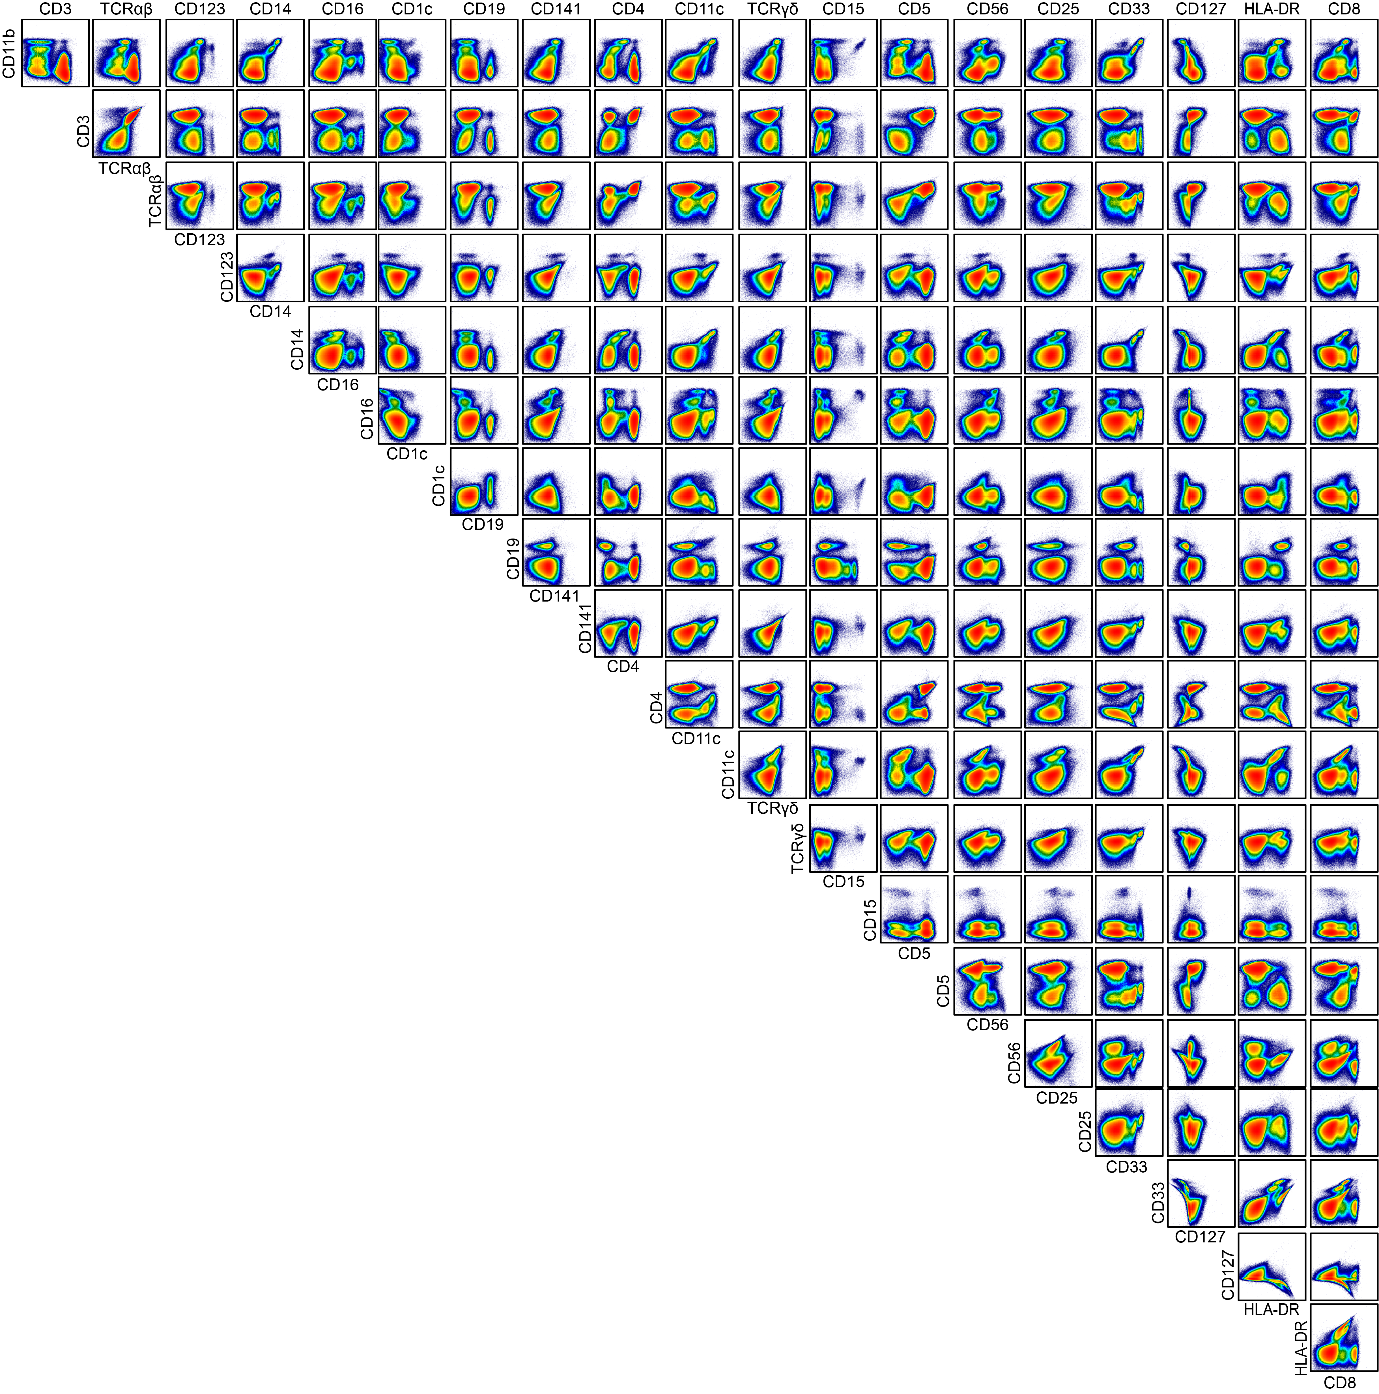


**Supplementary Fig. 6** **| Panel robustness assessed by an N×N matrix of 19 lineage markers in one healthy donor PBMCs.**

A comprehensive pairwise matrix displaying the expression patterns of 19 lineage markers in healthy donor PBMCs, stained with the concluded panel concentration. Population was pre-gated on live CD45⁺ cells.

## Supplementary Fig. 7 | Initial cleanup of manual gating


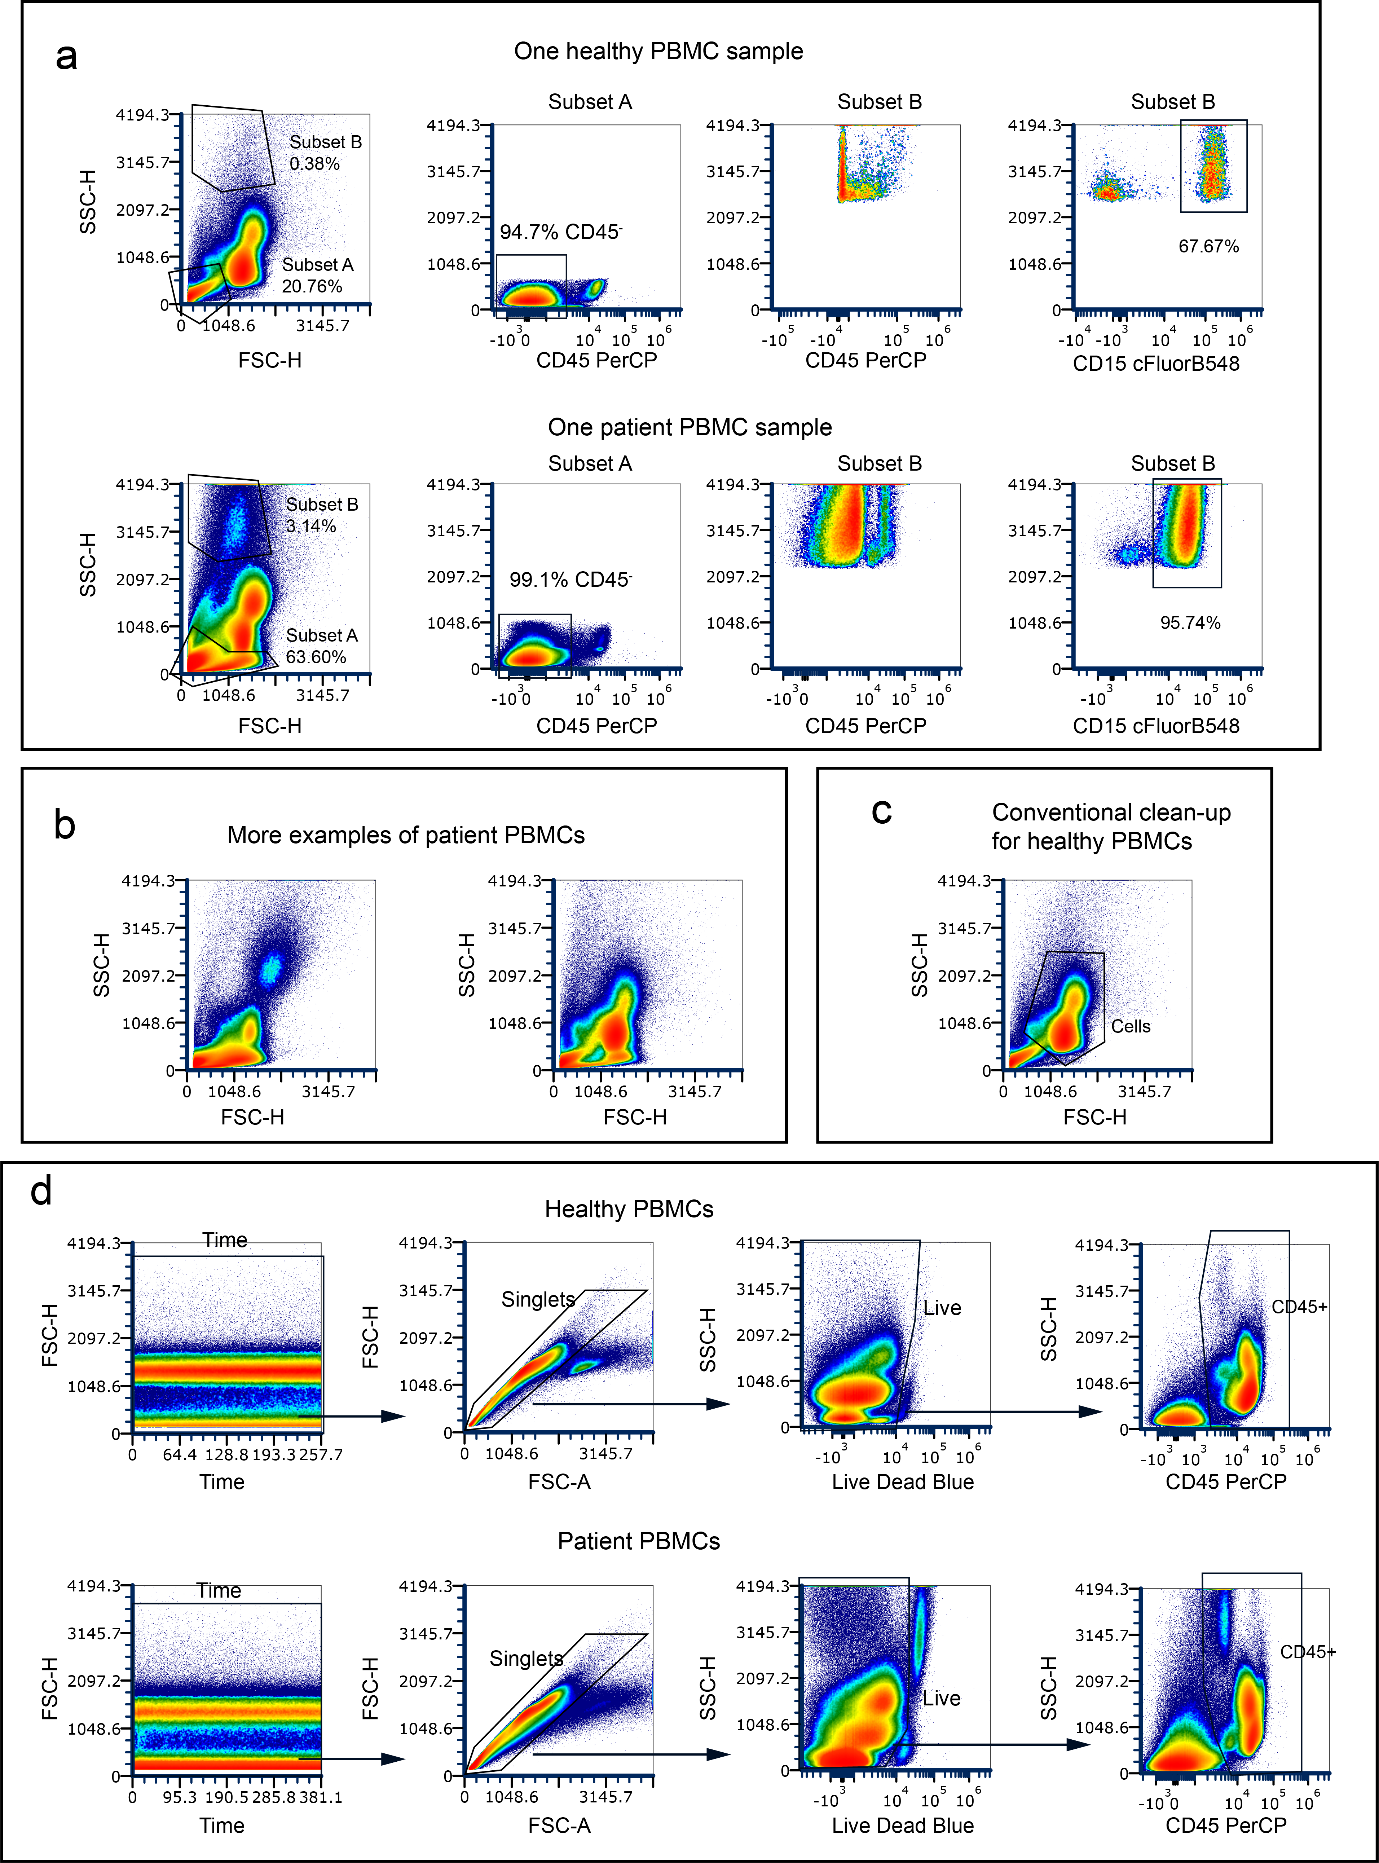


**Supplementary Fig. 7** **| Initial cleanup of manual gating.**

**a**, Example comparison of healthy PBMCs and patient PBMCs, showing distinct cell distributions along SSC. The very low SSC population is referred to as Subset A, while the very high SSC population is referred to as Subset B. Notably, Subsets A and B appear at higher percentages in this patient PBMC sample, with the majority of Subset B identified as CD45⁺ and CD15⁺. **b**, Additional patient PBMC samples are shown, each displaying unique distributions on SSC versus FSC. **c**, Standard gating applied to healthy PBMCs on SSC versus FSC to obtain a cleaned-up cell population. **d**, Cleanup step of gating adopted in this study: Time – Single Cells – Viability – CD45, without reliance on any specific position along FSC versus SSC. All samples shown in this figure were obtained in the same batch. The healthy sample is a control from a healthy subject (HS14), which was included in every batch. All percentages shown in the plots represent the proportion of the gated population relative to the parent population displayed in the given plot.

Supplementary Fig. 8 | Gating strategy within CD45⁺ population


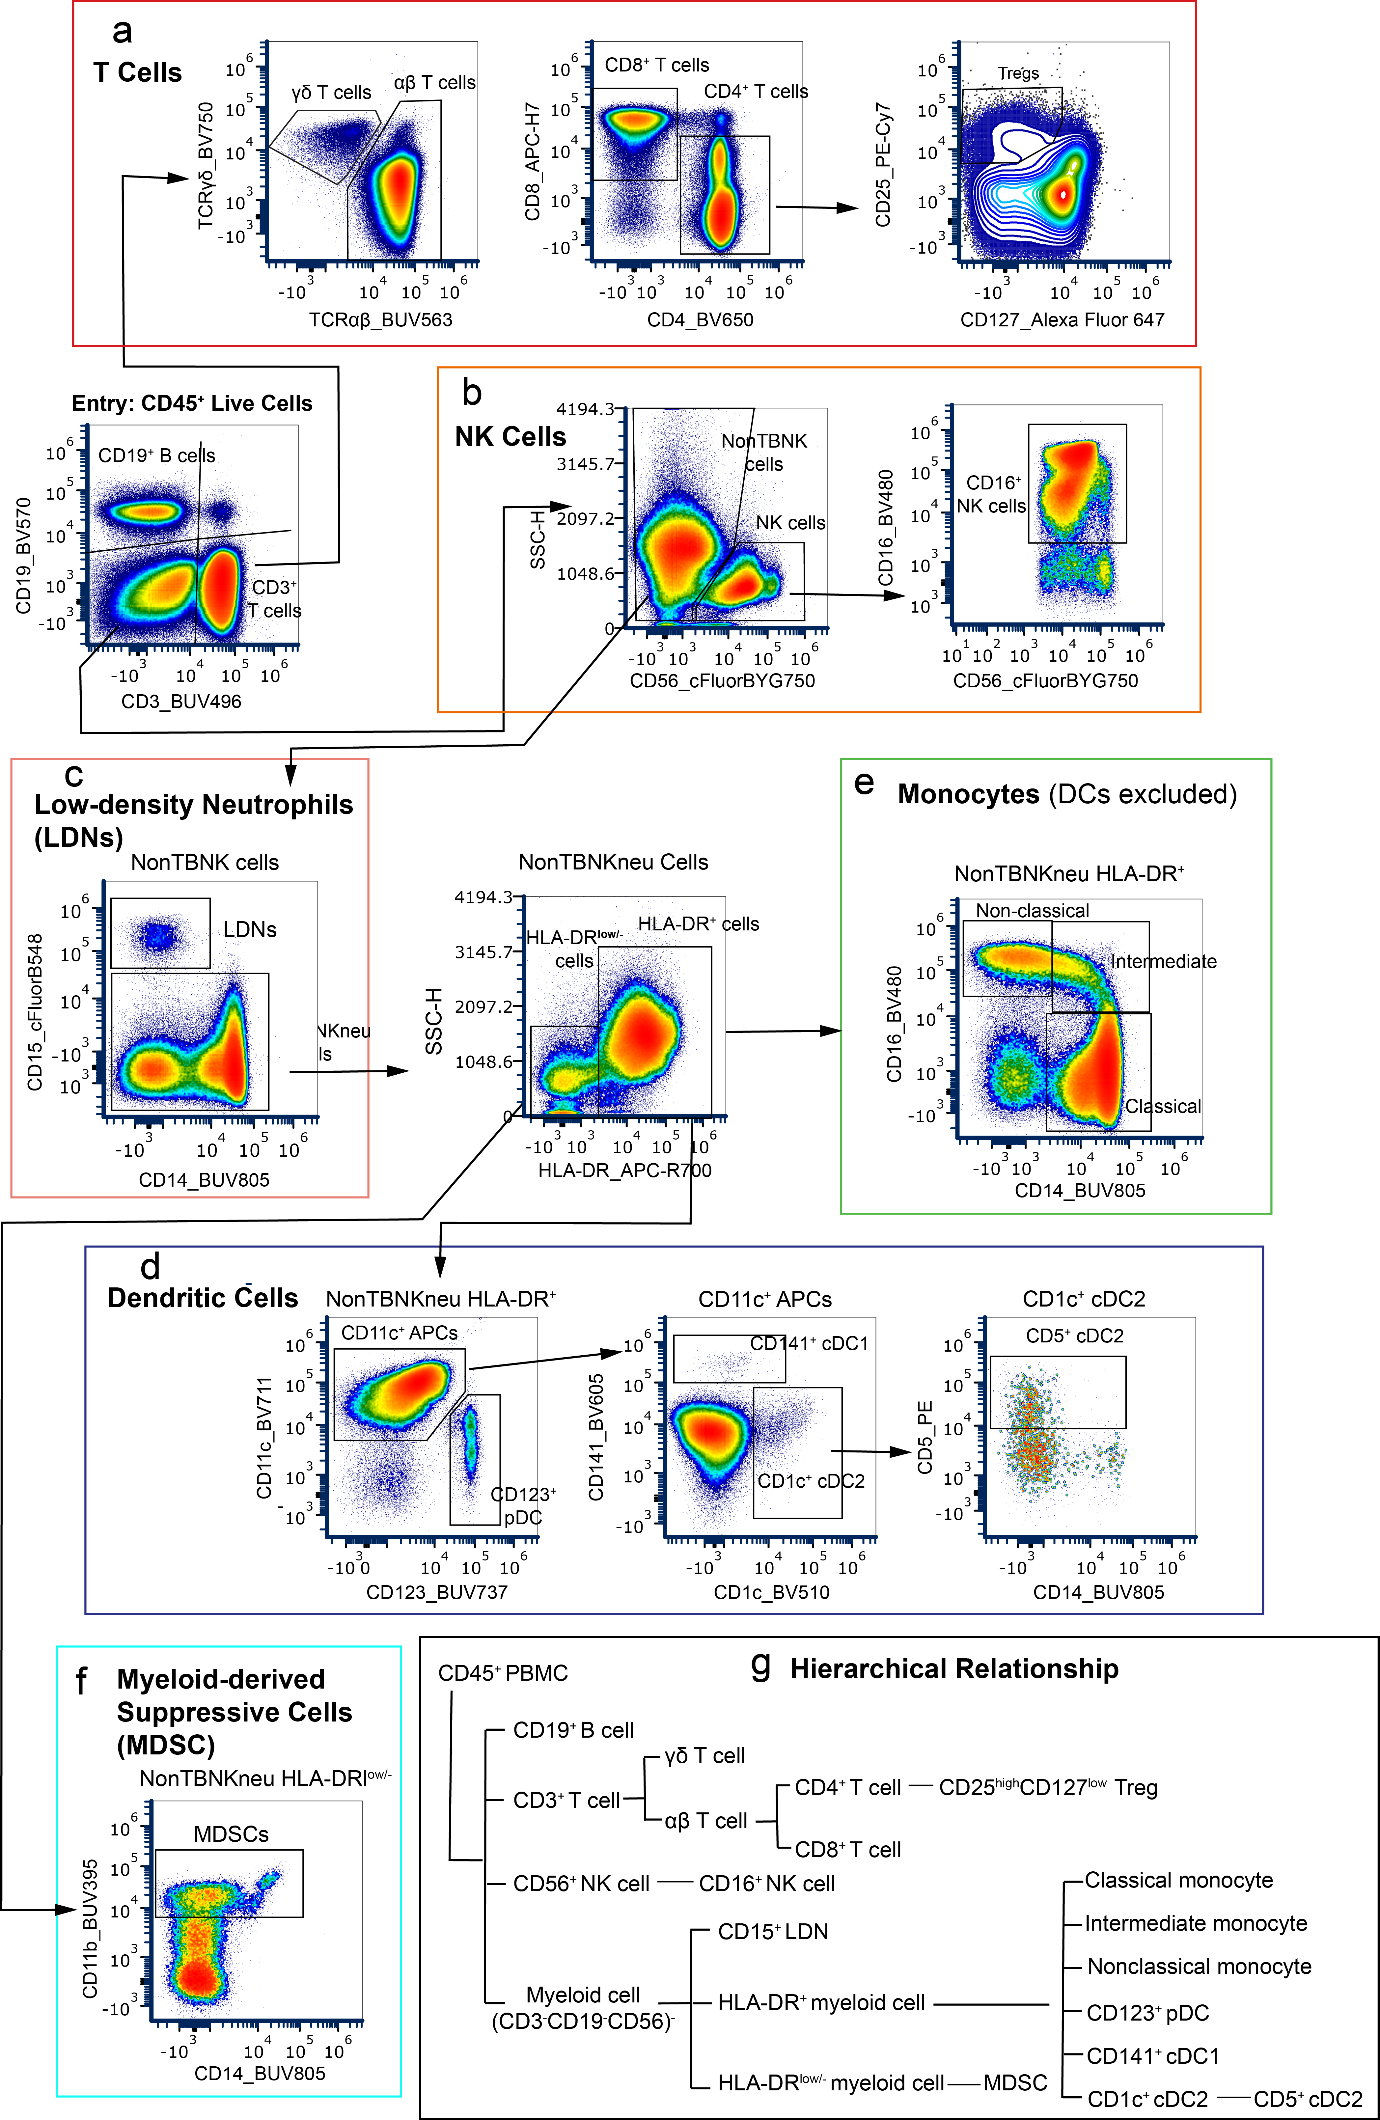


**Supplementary Fig. 8** **|** **Gating strategy within CD45⁺ population.**

Representative gating strategies for identifying specific immune subsets within the CD45+ population: (**a**) T cells, (**b**) NK cells, (**c**) low-density neutrophils (LDNs), (**d**) dendritic cells, (**e**) monocytes, and (**f**) myeloid-derived suppressor cells (MDSCs). (**g**) A schematic diagram summarizing the hierarchical gating relationships and lineage branches of all identified immune subsets. Data shown in flow plots (**a**–**f**) are from a Batch-1 control sample (healthy subject).

Supplementary Fig. 9 | Technical instability and phenotypic distortion preclude the discrete resolution of specific immune subsets


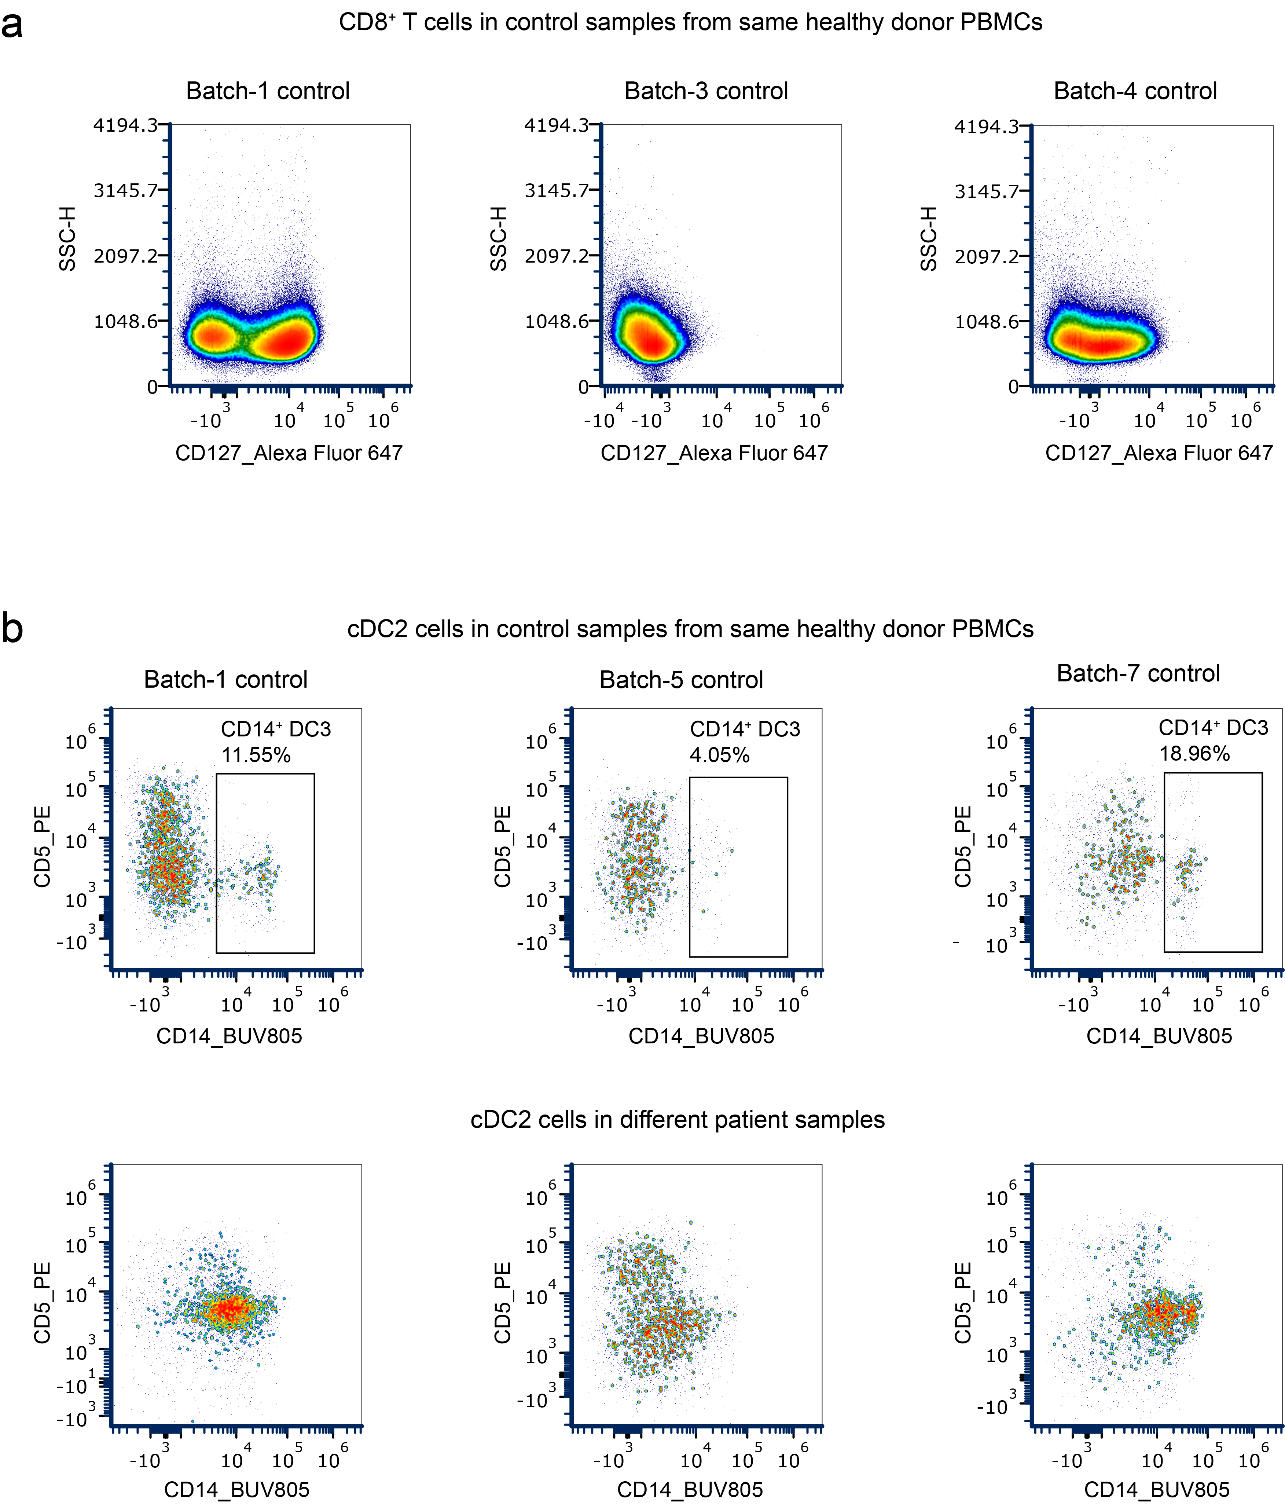


**Supplementary Fig. 9 | Technical instability and phenotypic distortion preclude the discrete resolution of specific immune subsets.**

**a**, Representative biaxial plots displaying CD127 expression on CD8+ T cells from a single healthy donor control PBMC sample acquired across three independent experimental batches. The severe batch-dependent fluctuation of the CD127 signal intensity and population distribution precluded the reliable, cohort-wide stratification of memory and effector T cell subsets. **b**, Evaluation of putative CD14+ DC3 populations pre-gated on cDC2s. Top: Plots from the same healthy donor control sample analyzed across three different batches, demonstrating profound technical instability in the frequency of the CD14+ fraction (percentages indicated). Bottom: Representative plots of cDC2s from three distinct cancer patient samples. The disease-associated phenotypic distortion creates a continuous spectrum of CD14 expression, rendering the discrete DC3 subset biologically unresolvable in the clinical cohort. Consequently, to ensure analytical rigor, subsets shown in (**a**) and (**b**) were not discretely partitioned and were instead evaluated collectively in downstream analyses.

## Supplementary Fig. 10 | Manual gating strategies to resolve phenotypic distortion and batch variability in cancer patient PBMCs


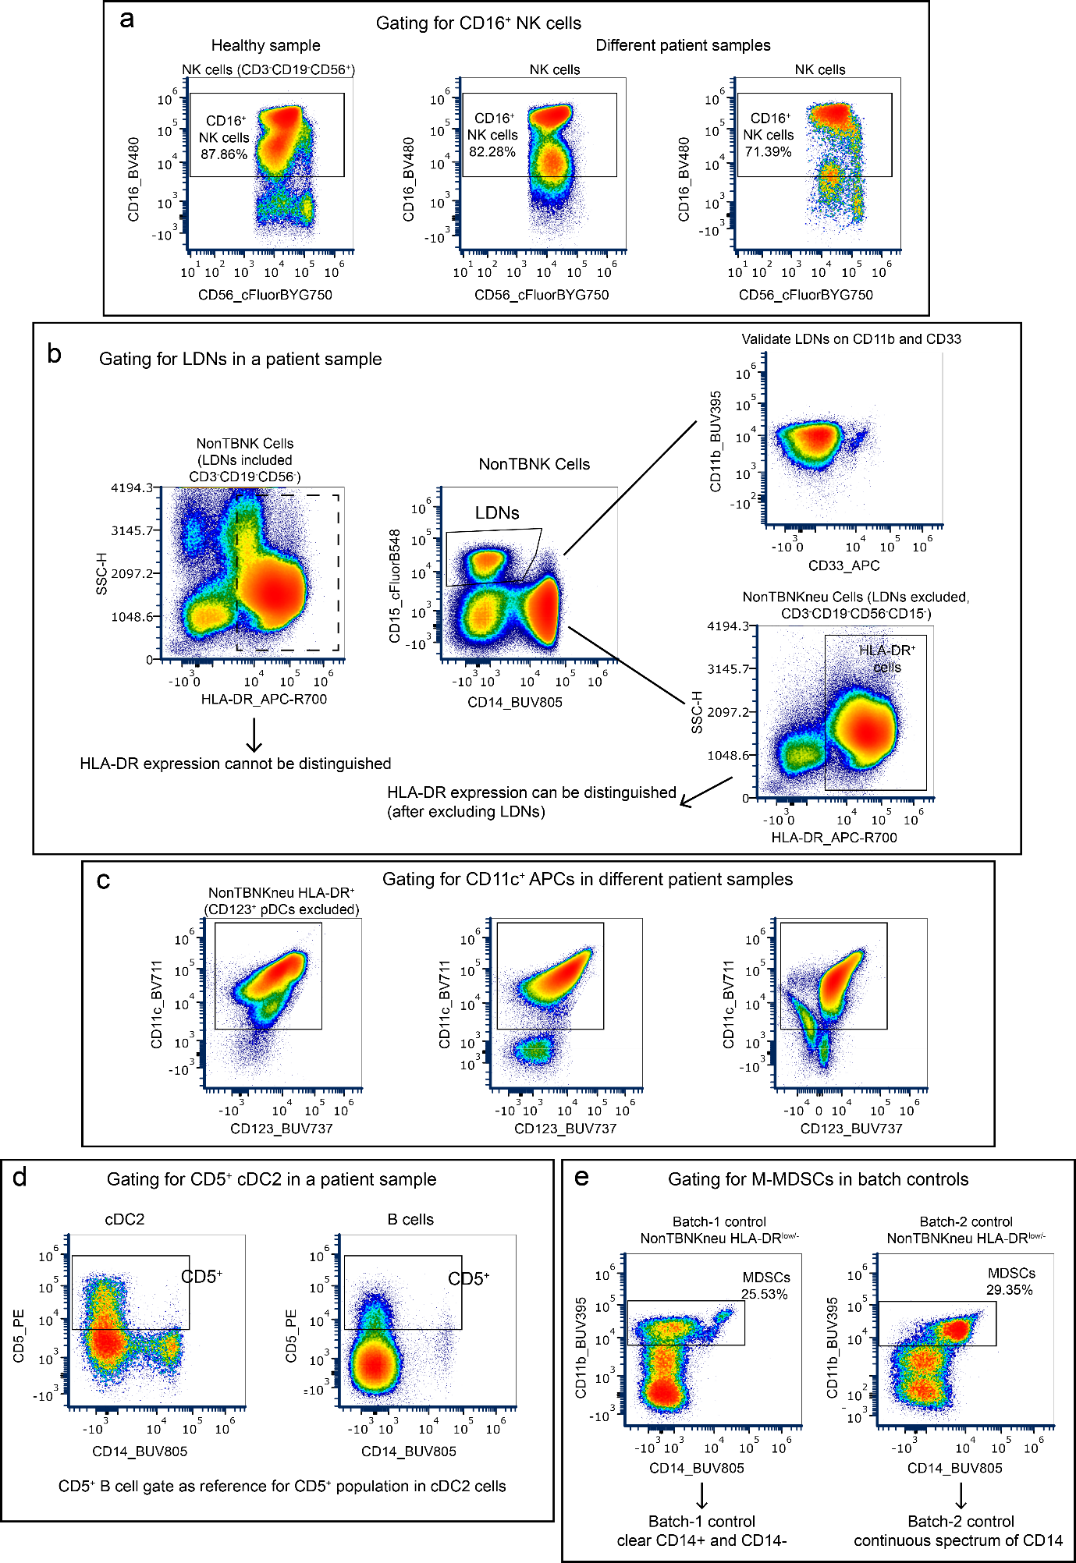


**Supplementary Fig. 10 | Manual gating strategies to resolve phenotypic distortion and batch variability in cancer patient PBMCs.**

**a**, Uniform gating of CD16⁺ NK cells within CD56⁺ NK cells. Compared to the discrete populations seen in healthy donors (left), patient samples frequently exhibit distorted, continuous CD16 expression. Standardized gating accommodates this disease-associated continuum (all three samples are from the same batch). **b**, Early gating of disease-expanded low-density neutrophils (LDNs; CD15⁺CD14⁻) to prevent downstream interference. LDNs are confirmed as CD11b⁺CD33dim (top right). Separating them from the remaining NonTBNK compartment (yielding NonTBNKneu cells) restores the resolution of the HLA-DR⁺ and HLA-DRlow/⁻ compartments (bottom right), which are otherwise entirely masked by the LDN continuum (left). **c**, Uniform gating of CD11c⁺ antigen-presenting cells (APCs) across different patient samples, demonstrating how standardized gating is maintained despite severe, patient-specific phenotypic heterogeneity in CD11c and CD123 expression shapes. **d**, Identification of CD5⁺ cDC2 subsets using an intra-sample internal calibration strategy. The boundary for CD5 positivity on cDC2s (left) is objectively established using the CD5 expression profile on B cells (right) from the exact same patient sample. **e**, Batch-resilient gating of myeloid-derived suppressor cells (MDSCs). Comparison of the identical control sample acquired in two different batches reveals technical instability in CD14 expression (discrete in Batch-1 vs. a continuous spectrum in Batch-2). To prevent arbitrary thresholding errors, MDSCs are gated collectively using stable CD11b⁺⁺ expression within the HLA-DRlow/⁻ compartment.

Supplementary Fig. 11 | Expression of functional and activation markers


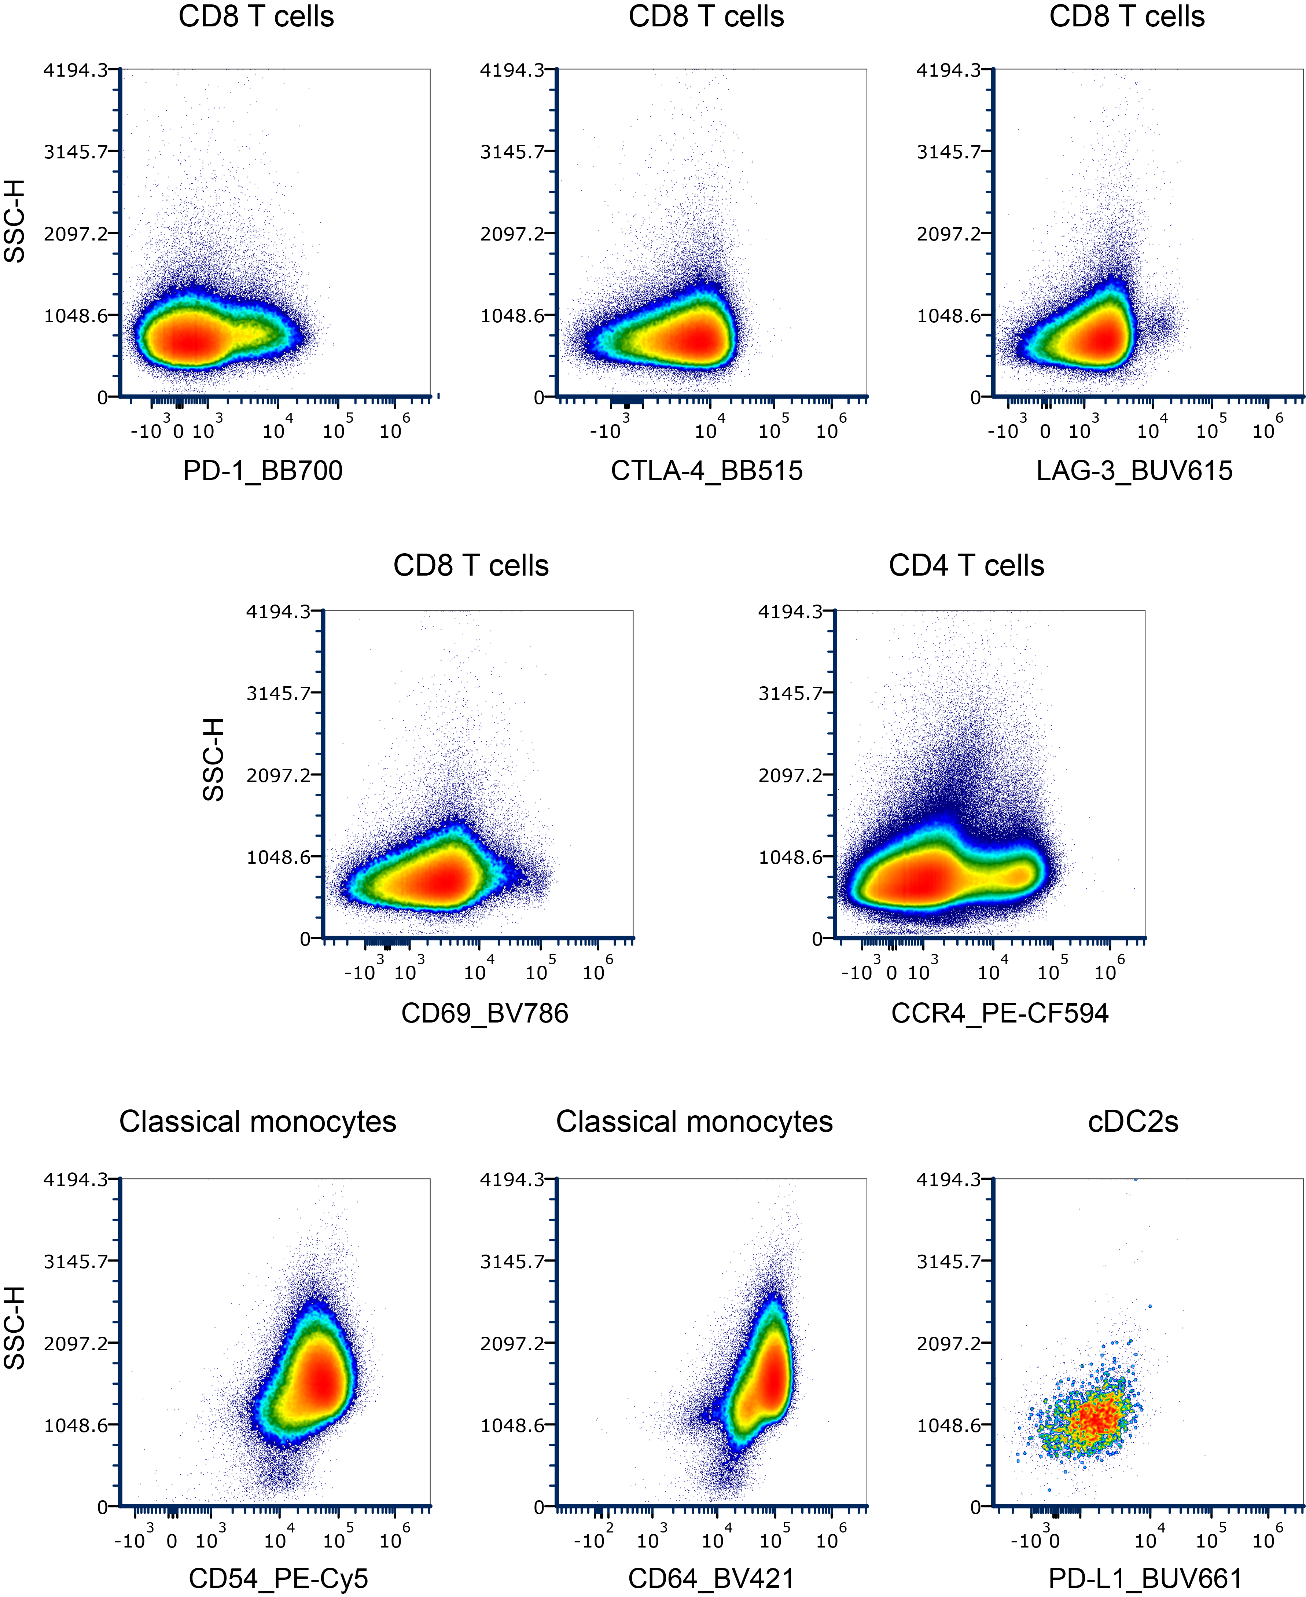


**Supplementary Fig. 11****|** **Expression of functional and activation markers.**

Representative plots illustrating continuous expression patterns of functional markers in selected cell subsets. Arcsinh-transformed Median fluorescence intensity (arcsinh-MFI) values were used for quantitative analysis, as definitive positive or negative gating was not feasible.

## Supplementary Fig. 12 | Assessment of technical variability and subset consistency across batch controls


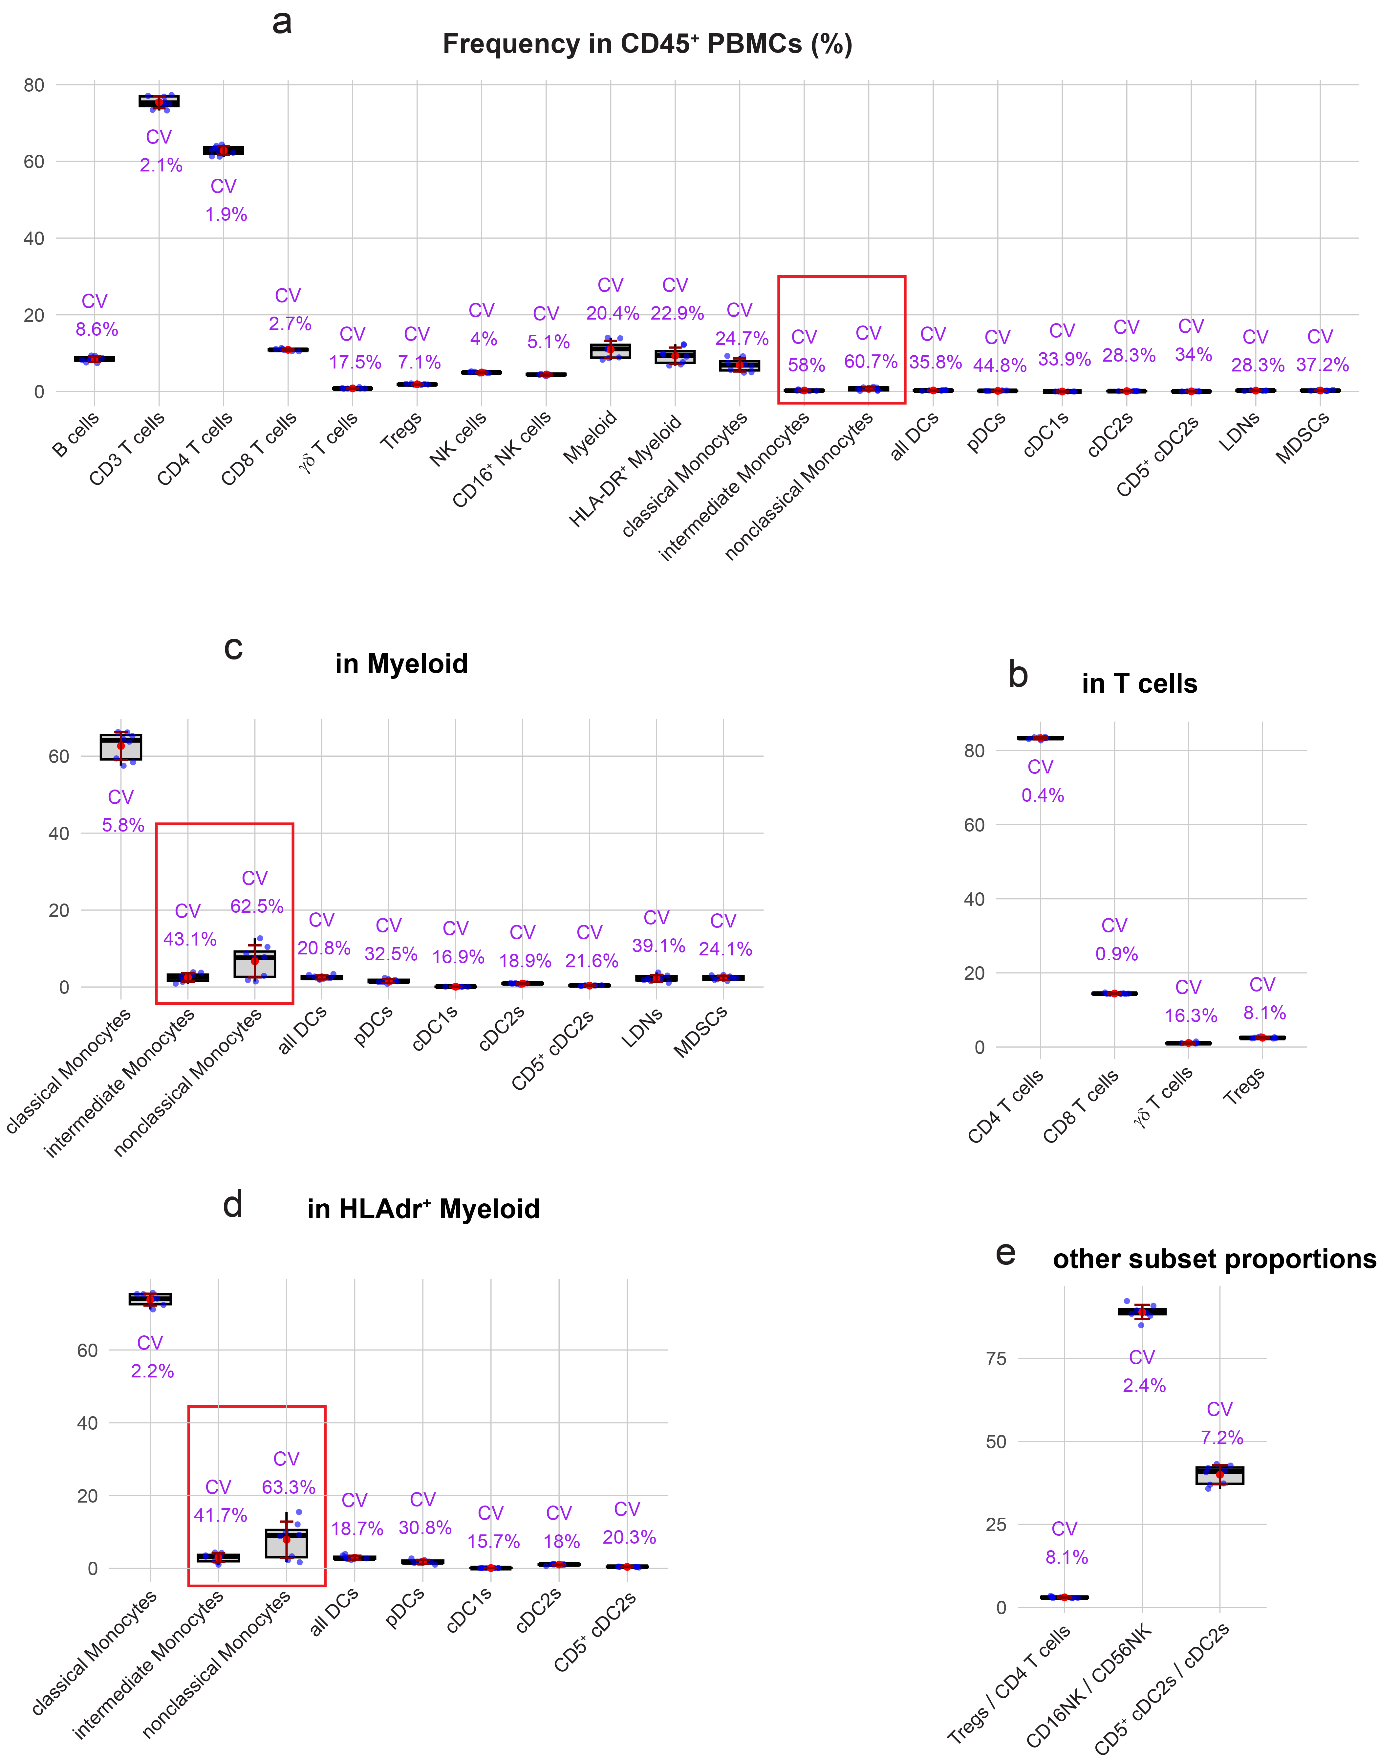


**Supplementary Fig. 12 | Assessment of technical variability and subset consistency across batch controls.**

Box plots illustrating immune cell subset frequencies calculated relative to different parent populations (denominators) using identical healthy control samples included in each experimental batch (8 independent batches). Frequencies are shown as: **a**, percentage of total CD45⁺ PBMCs, **b**, percentage of CD3⁺ T cells, **c**, percentage of total myeloid cells, **d**, percentage of HLA-DR⁺ myeloid cells, and **e**, selected proportions relative to other specific subsets. For each cell population, blue dots represent individual control values from each batch. The red dot and corresponding red error bars denote the mean  standard deviation (SD). Boxes show 25th, 50th and 75th centiles; whiskers indicate 1.5 × inter-quartile range; points represent individual samples. Although the absolute SD values across all subsets remained relatively low (range: 0.003 to 3.615), SD does not account for differences in mean population sizes. Therefore, the coefficient of variation (CV) was calculated (displayed in purple) to properly assess relative variability. This CV assessment revealed that intermediate and nonclassical monocytes lacked technical consistency; these subsets are highlighted with red bounding boxes and were subsequently excluded from downstream analyses.

Supplementary Fig. 13 | Phenotypic characterization and validation of automated myeloid cell clustering.


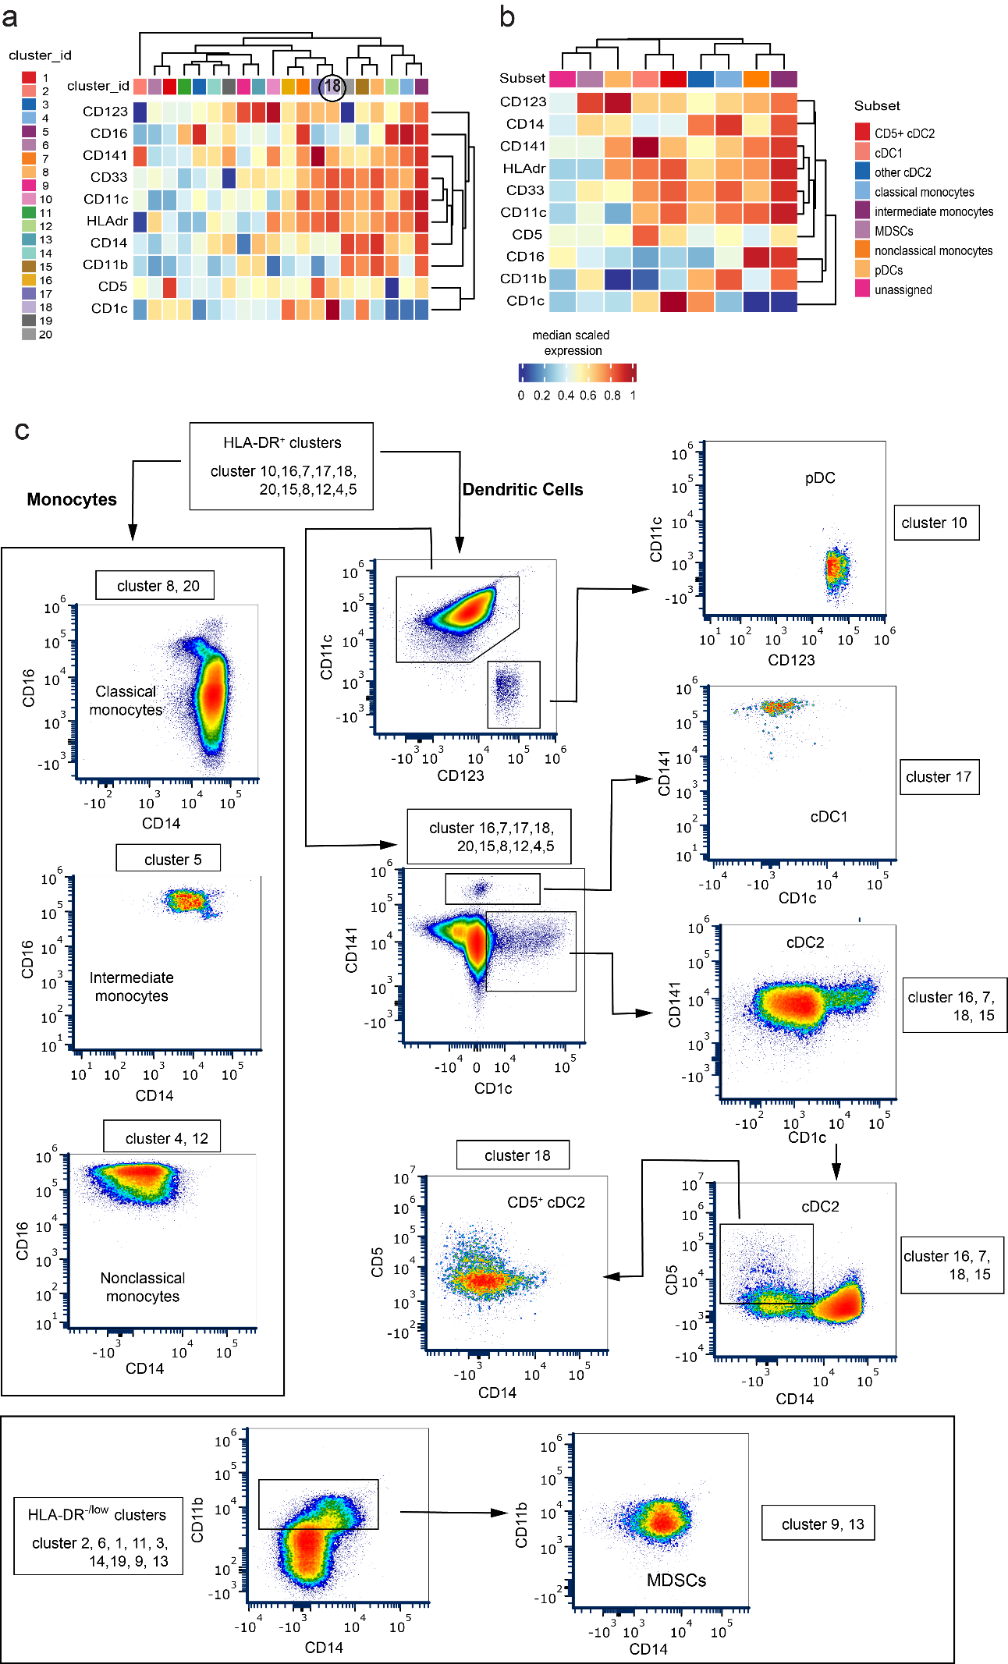


**Supplementary Fig. 13 | Phenotypic characterization and validation of automated myeloid cell clustering.**

**a,** Heatmap displaying the median scaled expression of ten phenotypic lineage markers across the 20 metaclusters generated by unsupervised clustering (FlowSOM and ConsensusClusterPlus) of pre-gated myeloid cells (CD3⁻CD19⁻CD56⁻CD15⁻). Metacluster 18, which corresponds to the CD5⁺ cDC2 population, is highlighted by a black circle. **b**, Heatmap illustrating the aggregated marker expression profiles after manually annotating and merging the 20 initial metaclusters into distinct biological subsets. **c**, Representative bi-axial flow cytometry plots displaying the computationally derived metaclusters. The flow of the arrows demonstrates that the phenotypic hierarchy and distribution of the automated clusters align with the established manual gating strategy (detailed in Supplementary Fig. 8). This back-gating validation confirms the phenotypic consistency and biological relevance of the unsupervised clustering approach. However, a technical artifact emerged in cluster 17 (annotated as cDC1): automated clustering assigned high CD5 expression to this subset in the heatmaps (**a**, **b**), whereas manual gating reveals cDC1s exhibit only moderate or low CD5 compared to CD5⁺ cDC2. This discrepancy likely reflects redistributed CD5 expression intensities during computational batch alignment, underscoring a limitation of automated workflows in resolving overlapping continuous marker distributions.

Supplementary Fig. 14 | Baseline PD-1 expression on dendritic cells versus T cell subsets*.*


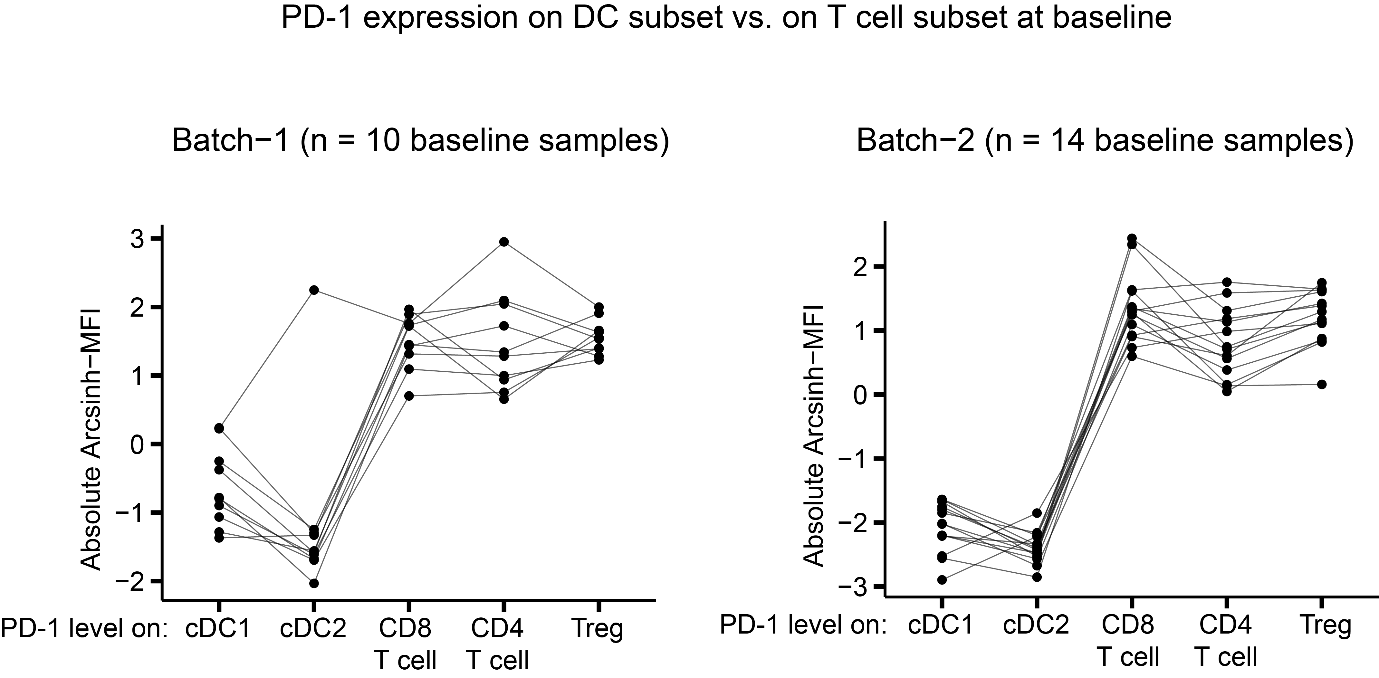


**Supplementary Fig. 14 | Baseline PD-1 expression on dendritic cells versus T cell subsets.**

Line plots displaying the absolute arcsinh-transformed median fluorescence intensity (MFI) of PD-1 across five immune cell subsets (cDC1, cDC2, CD8⁺ T cells, CD4⁺ T cells, and Tregs) at baseline. Data are presented for two independent experimental batches (Batch-1, n = 10 baseline samples; Batch-2, n = 14 baseline samples). Lines connect data points from the same individual patient to illustrate intra-sample expression hierarchies. To enable valid cross-subset comparisons within individual samples, absolute arcsinh-MFI values are utilized here. This approach fundamentally differs from the subset-specific normalized MFI used in the main figures, which correct for batch-to-batch variability across different samples but preclude direct comparisons between distinct cell lineages. These unnormalized data consistently demonstrate that baseline PD-1 expression on cDC1 and cDC2 subsets is minimal compared to the high levels observed on T cells. This minimal baseline expression supports the biological premise that post-treatment PD-1 upregulation on myeloid cells likely reflects activation-induced signalling rather than the direct therapeutic blockade of pre-existing receptors. No statistical testing was applied to these illustrative intra-sample comparisons.

## Supplementary Fig. 15 |Schematic representation of the species-resolved functional data structure used for differential per-cell output modelling.


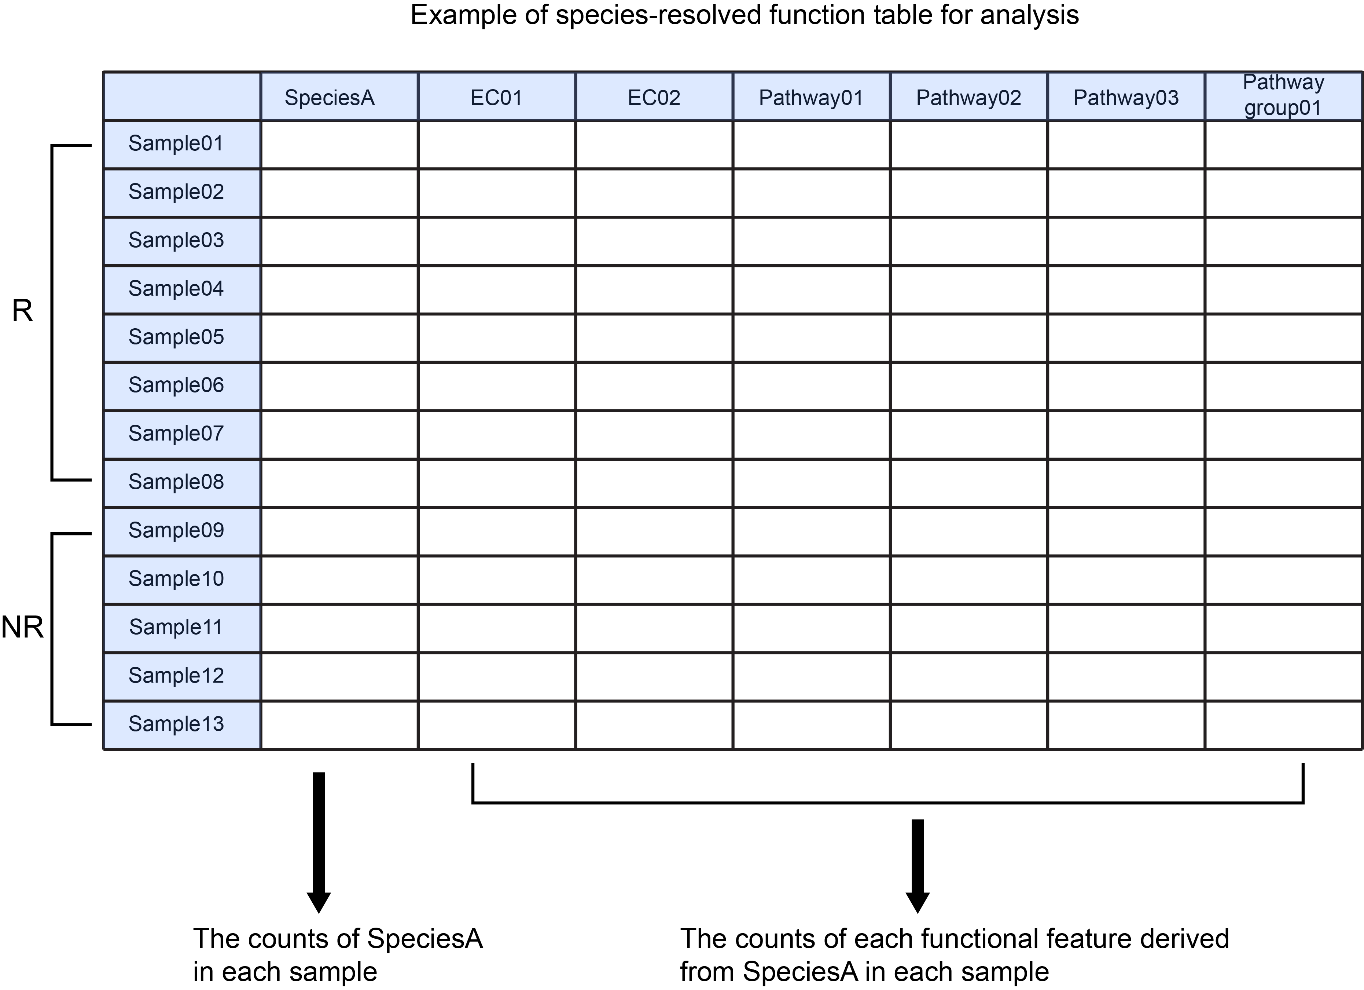


**Supplementary Fig. 15 | Schematic representation of the species-resolved functional data structure used for differential per-cell output modelling.**

This table illustrates the input data matrix generated for each signature species to evaluate function-per-cell output via DESeq2. Rows represent individual patient samples, stratified by clinical response (R, responders; NR, non-responders). Columns denote the absolute counts of a representative species (e.g., "SpeciesA") alongside the absolute counts of specific functional features (such as Enzyme Commission [EC] genes, MetaCyc pathways, and pathway groups) that are genetically derived from that exact species within each sample. In the subsequent differential analysis, the species counts (left arrow) were incorporated as the library size factor to normalize the corresponding functional feature counts (right arrow), allowing for the isolation of metabolic shifts independent of changes in taxonomic biomass.

## Supplementary Table 1. Optical layout of fluorochromes and reagents

| **Approx. Emission Wavelength (nm)** | **UV** | **Violet** | **Blue** | **Yellow Green** | **Red** |
| --- | --- | --- | --- | --- | --- |
| **395** | BUV395 (CD11b) |  |  |  |  |
| **420** |  | BV421 (CD64) |  |  |  |
| **450** | L/D Blue (Viability) |  |  |  |  |
| **480** |  | BV480 (CD16) |  |  |  |
| **500** | BUV496 (CD3) |  | BB515 (CTLA-4) |  |  |
| **520** |  | BV510 (CD1c) |  |  |  |
| **550** |  |  | cFluorB548 (CD15) |  |  |
| **570** | BUV563 (TCRαβ) | BV570 (CD19) |  |  |  |
| **580** |  |  |  | PE (CD5) |  |
| **600** | BUV615 (LAG-3) | BV605 (CD141) |  | PE-CF594 (CCR4) |  |
| **660** | BUV661 (PD-L1) | BV650 (CD4) |  |  | APC (CD33) |
| **680** |  |  | PerCP (CD45) | PE-Cy5 (CD54) | Alexa Fluor 647 (CD127) |
| **700** |  | BV711 (CD11c) | BB700 (PD-1) |  | APC-R700 (HLA-DR) |
| **730** | BUV737 (CD123) |  |  |  |  |
| **750** |  | BV750 (TCRγδ) |  | cFluor BYG750 (CD56) |  |
| **780** |  | BV786 (CD69) |  | PE-Cy7 (CD25) | APC-H7 (CD8) |
| **800** | BUV805 (CD14) |  |  |  |  |

## Supplementary Table 2. Antibody panel with fluorochromes, clones, and functional purpose

| **Specificity** | **Fluorochrome** | **Clone** | **Purpose** |
| --- | --- | --- | --- |
| Viability | Live Dead UV Blue |  | Viability |
| CD45 | PerCP | 2D1 | Leukocytes |
| CD3 | BUV496 | UCHT1 | Pan T cells |
| TCRγδ | BV750 | 11F2 | γδ T cells |
| TCRαβ | BUV563 | IP26 | αβ T cells |
| CD4 | BV650 | SK3 | Helper T cell subsets |
| CD8 | APC-H7 | HIT8a | Cytotoxic T cells |
| CD25 | PE-Cy7 | M-A251 | Regulatory T cells |
| CD127 | Alexa Fluor 647 | HIL-7R-M21 | T cell differentiation and memory |
| CD19 | BV570 | HIB19 | B cells |
| CD56 | cFluor-BYG750 | TULY56 | NK cells |
| HLA-DR | APC-R700 | G46-6 | Antigen-presenting cells |
| CD14 | BUV805 | M5E2 | Monocyte subsets |
| CD16 | BV480 | 3G8 | Monocyte, dendritic cell, NK cell activation |
| CD11c | BV711 | S-HCL-3 | Dendritic cell differentiation |
| CD123 | BUV737 | 9F5 | Plasmacytoid dendritic cells |
| CD141 | BV605 | 1A4 | Conventional dendritic cell differentiation |
| CD1c | BV510 | L161 | Conventional dendritic cell differentiation |
| CD11b | BUV395 | D12 | Innate immune cells |
| CD33 | APC | P67.6 | Myeloid cells |
| CD15 | cFluorB548 | HI98 | Neutrophil-like cells |
| CD5 | PE | UCHT2 | Dendritic cell activation |
| CD69 | BV786 | FN50 | Early T cell activation |
| CD64 | BV421 | MD22 | Monocyte, dendritic cell activation |
| CD54 | PE-Cy5 | HA58 | Activation of T, B, NK, dendritic cells and monocytes |
| PD-1 | BB700 | EH12.1 | Inhibitory receptor, T cell exhaustion |
| PD-L1 | BUV661 | MIH1 | Immune checkpoint ligand, expressed on APCs |
| CTLA-4 | BB515 | BNI3 | Inhibitory receptor on regulatory and activated T cells |
| LAG-3 | BUV615 | T47-530 | Inhibitory receptors; T cell regulation and exhaustion |
| CCR4 | PE-CF594 | 1G1 | Chemokine receptor; Treg and Th2 cell trafficking |

## Supplementary Table 3. Antibody sources, vendors, and titration details

| **Antibody** | **Catalog** | **Vendor** | **Titer (ng/test)** | **Working Dilution (per 200µl test)** |
| --- | --- | --- | --- | --- |
| BUV395_ CD11b | 742634 | BD Biosciences | 31 | 1/1280 |
| Live Dead UV Blue | L34962 | Thermo Fisher | – | 1/250 |
| BUV496_CD3 | 612940 | BD Biosciences | 250 | 1/160 |
| BUV563_ TCRαβ | 749197 | BD Biosciences | 1000 | 1/40 |
| BUV615_ LAG-3 | 752362 | BD Biosciences | 1000 | 1/40 |
| BUV661_ PD-L1 | 741666 | BD Biosciences | 1000 | 1/40 |
| BUV737_ CD123 | 741851 | BD Biosciences | 250 | 1/160 |
| BUV805_ CD14 | 612902 | BD Biosciences | 250 | 1/160 |
| BV421_ CD64 | 744827 | BD Biosciences | 500 | 1/80 |
| BV480_ CD16 | 566108 | BD Biosciences | 500 | 1/160 |
| BV510_ CD1c | 331534 | BioLegend | 62.5 | 1/160 |
| BV570_ CD19 | 302236 | BioLegend | 500 | 1/40 |
| BV605_ CD141 | 740421 | BD Biosciences | 250 | 1/160 |
| BV650_ CD4 | 563875 | BD Biosciences | 15.5 | 1/320 |
| BV711_ CD11c | 744438 | BD Biosciences | 125 | 1/320 |
| BV750_ TCRγδ | 747127 | BD Biosciences | 1000 | 1/40 |
| BV786_ CD69 | 563834 | BD Biosciences | 1000 | 1/80 |
| BB515_ CTLA-4 | 566917 | BD Biosciences | 250 | 1/160 |
| cFluorB548_ CD15 | R7-11025 | CYTEK | 125 | 1/320 |
| PerCP_CD45 | 679459 | CYTEK | 250 | 1/80 |
| BB700_ PD-1 | 566460 | BD Biosciences | 250 | 1/160 |
| PE_ CD5 | 500059 | CYTEK | 125 | 1/320 |
| PE-CF594_ CCR4 | 565391 | BD Biosciences | 500 | 1/80 |
| PE-Cy5_ CD54 | 555512 | BD Biosciences | 31 | 1/80 |
| cFluor-BYG750_ CD56 | R7-20283 | CYTEK | 31 | 1/1280 |
| PE-Cy7_ CD25 | 557741 | BD Biosciences | 500 | 1/80 |
| APC_ CD33 | 366606 | BioLegend | 15.5 | 1/1280 |
| Alexa Fluor 647_ CD127 | 558598 | BD Biosciences | 125 | 1/20 |
| APC-R700_ HLA-DR | 565127 | BD Biosciences | 23.4 | 1/1280 |
| APC-H7_ CD8 | 566855 | BD Biosciences | 62.5 | 1/320 |

## Supplementary Table 4. Associations of patient demographics and clinical variables with response status

| **Characteristics** | **Responders ( n = 56)** | **Non-responders (n = 17)** | **P-value** |
| --- | --- | --- | --- |
| Gender • Male • Female | 36 (64.29%, 75%) 20 (35.71%, 80%) | 12 (70.59%, 25%) 5 (29.41%, 20%) | 0.851 (Chi-squared) |
| Age | mean (66.02) | mean (62.24) | 0.092 (Wilcoxon) |
| BMI | mean (29.19) | mean (28.72) | 1 (Wilcoxon) |
| Cancer Type 1. Melanoma 2. NSCLC  3. Renal 4. cSCC 5. HNC | 1. 24 (42.85%, 80%) 2. 19 (33.93%, 79.16%) 3. 5 (8.93%, 62.5%) 4. 8 (14.29%, 88.89%) 5. 0 | 1. 6 (35.29%, 20%) 2. 5 (29.41%, 20.83%) 3. 3 (17.65%, 37.5%) 4. 1 (5.88%, 11.11%) 5. 2 (11.76%, 100%) | 0.1227 (Fisher's exact) |
| Pre-treatment antibiotic use (past 3 months) • Yes  • No | • 21 (37%, 87.5%)  • 35 (62%, 71.43%) | • 3 (17%, 12.5%)  • 14 (82%, 28.57%) | 0.218 (Chi-squared) |
| Alcohol 1. Current 2. Former 3. Never | 1. 24 (42.86%, 82.76%) 2. 9 (16.07%, 75%) 3. 23 (41.07%, 71.88%) | 1. 5 (29.41%, 17.24%) 2. 3 (17.65%, 25%) 3. 9 (52.94%, 28.12%) | 0.6143 (Fisher's exact) |
| Smoking 1. Current 2. Former 3. Never | 1. 14 (25%, 73.69%) 2. 24 (42.86%, 77.42%) 3. 18 (32.14%, 78.26%) | 1. 5 (29.41%, 26.31%) 2. 7 (41.18%, 22.58%) 3. 5 (29.41%, 21.74%) | 1 (Fisher's exact) |
| Therapy Type • Monotherapy (Cemiplimab or Pembrolizumab or Nivolumab) • Combined therapy (Ipilimumab / Nivolumab) | • 37 (66.07%, 78.72%)   • 19 (33.93%, 73.08%) | • 10 (58.82%, 21.28%)   • 7 (41.18%, 26.92%) | 0.797 (Chi-squared) |
| irAE severity • Mild (Grade 0 -2) • Severe (Gade >= 3) | • 46 (82.14%, 75.41%) • 10 (17.86%, 83.33%) | • 15 (88.24%, 24.59%) • 2 (11.75%, 16.67%) | 0.72 (Fisher's exact) |

Note: For categorical variables, data are presented as patient counts with column and row percentages: n (column %, row %). Continuous variables (age and body mass index [BMI]) are presented as mean values. Statistical significance between responders (n = 56) and non-responders (n = 17) was assessed using two-sided Wilcoxon rank-sum tests for continuous variables. For categorical variables, Pearson's chi-squared tests were utilized when all expected cell frequencies were 5; otherwise, Fisher’s exact tests were applied. The specific statistical test used for each variable is indicated in the rightmost column.

## Supplementary Table 5. Association between therapy type and longitudinal changes in surface CTLA-4 expression across immune cell subsets.

|  | **Combined Therapy (anti-PD-1/CTLA-4) （n = 18)** | **Mono Therapy (anti-PD-1) (n = 33)** | **P value (chi-squared)** |
| --- | --- | --- | --- |
| CTLA-4 on B cells • Decrease • Increase | • 6 (33.33%, 33.33%) • 12 (66.67%, 36.36%) | • 12 (36.36%, 66.67%) • 21 (63.64%, 63.64%) | 0.829 |
| CTLA-4 on CD4 cells • Decrease • Increase | • 6 (33.33%, 31.58%) • 12 (66.67%, 37.5%) | • 13 (39.39%, 68.42%) • 20 (60.61%, 62.5%) | 0.669 |
| CTLA-4 on CD8 cells • Decrease • Increase | • 5 (27.78%, 29.41%) • 13(72.22%, 38.24%) | • 12 (36.36%, 70.59%) • 21 (63.63%, 61.76%) | 0.534 |
| CTLA-4 on Tregs • Decrease • Increase | • 5 (27.78%, 27.78%) • 13(72.22%, 39.39%) | • 13 (39.39%, 72.22%) • 20 (60.61%, 60.6%) | 0.407 |
| CTLA-4 on NK cells • Decrease • Increase | • 3 (16.67%, 20%) • 15(83.33%, 41.67%) | • 12 (36.36%, 80%) • 21 (63.63%, 58.33%) | 0.14 |
| CTLA-4 on CD16⁺ NK cells • Decrease • Increase | • 3 (16.67%, 20%) • 15(83.33%, 41.67%) | • 12 (36.36%, 80%) • 21 (63.63%,58.33%) | 0.14 |
| CTLA-4 on HLA-DR myeloid cells • Decrease • Increase | • 4 (22.22%, 22.22%) • 14(77.78%, 42.42%) | • 14 (42.42%, 77.78%) • 19 (57.58%, 57.58%) | 0.149 |
| CTLA-4 on Classical monocytes • Decrease • Increase | • 4 (22.22%, 22.22%) • 14(77.78%, 42.42%) | • 14 (42.42%, 77.78%) • 19 (57.58%, 57.58%) | 0.149 |
| CTLA-4 on pDC • Decrease • Increase | • 3 (16.67%, 15%) • 15(83.33%, 48.39%) | • 17 (51.51%, 85%) • 16 (48.49%, 51.61%) | **0.0148** |
| CTLA-4 on cDC1 • Decrease • Increase | • 4 (22.22%, 23.52%) • 14(77.78%, 41.17%) | • 13 (39.39%, 76.47%) • 20 (60.61%, 58.82%) | 0.214 |
| CTLA-4 on cDC2 • Decrease • Increase | • 2 (11.11%, 13.33%) • 16(88.89%, 44.44%) | • 13 (39.39%, 86.67%) • 20 (60.61%, 55.56%) | **0.0341** |
| CTLA-4 on CD5⁺ cDC2 • Decrease • Increase | • 2 (11.11%, 10.52%) • 16(88.89%, 50%) | • 17 (51.51%, 89.47%) • 16 (48.49%, 50%) | **0.004** |
| CTLA-4 on LDNs • Decrease • Increase | • 7 (38.89%, 29.17%) • 11(61.11%, 40.74%) | • 17 (51.51%, 70.83%) • 16 (48.49%, 59.26%) | 0.388 |
| CTLA-4 on MDSCs • Decrease • Increase | • 5 (27.78%, 27.78%) • 13(72.22%, 39.39%) | • 13 (39.39%, 72.22%) • 20 (60.61%, 60.60%) | 0.407 |

**Note**: Data are presented as patient counts with column and row percentages: n (column %, row %). The direction of CTLA-4 expression change (increase or decrease from baseline to post-treatment) was compared between patients receiving anti-PD-1 monotherapy (n = 33) and anti-PD-1/CTLA-4 combination therapy (n = 18). P values were calculated using Pearson’s chi-squared test (all expected group counts  5); bold text indicates nominal significance (P < 0.05). While pDC, cDC2, and CD5⁺ cDC2 subsets exhibited nominal statistical significance, combination therapy was paradoxically associated with a higher frequency of CTLA-4 increase rather than the expected decrease associated with CTLA-4 blockade. Consequently, these variations were not considered indicative of a systematic, therapy-driven reduction in CTLA-4 expression, justifying the pooling of these cohorts for downstream analysis.

## Supplementary Table 6. Association between longitudinal changes in surface CTLA-4 expression and clinical response within the combination therapy cohort.

|  | **Responders (n = 15)** | **Non-responders (n = 3)** | **P-value (Fisher's exact)** |
| --- | --- | --- | --- |
| CTLA-4 on B cells • Decrease • Increase | • 5 (33.33%, 83.33%) • 10 (66.67%, 83.33%) | • 1 (33.33%, 16.67%) • 2 (66.67%, 16.67%) | 1 |
| CTLA-4 on CD4 cells • Decrease • Increase | • 5 (33.33%, 83.33%) • 10 (66.67%, 83.33%) | • 1 (33.33%, 16.67%) • 2 (66.67%, 16.67%) | 1 |
| CTLA-4 on CD8 cells • Decrease • Increase | • 5 (33.33%, 100%) • 10 (66.67%, 76.92%) | • 0  • 3 (100%, 23.08%) | 0.522 |
| CTLA-4 on Tregs • Decrease • Increase | • 5 (33.33%, 100%) • 10 (66.67%, 79.92%) | • 0  • 3 (100%, 23.08%) | 0.522 |
| CTLA-4 on NK cells • Decrease • Increase | • 3 (20%, 100%) • 12 (80%, 80%) | • 0 • 3 (100%, 20%) | 1 |
| CTLA-4 on CD16⁺ NK cells • Decrease • Increase | • 3 (20%, 100%) • 12 (80%, 80%) | • 0  • 3 (100%, 20%) | 1 |
| CTLA-4 on HLA-DR Myeloid cells • Decrease • Increase | • 4 (26.67%, 100%) • 11 (73.33%, 78.57%) | • 0 • 3 (100%, 21.42%) | 1 |
| CTLA-4 on classical Monocytes • Decrease • Increase | • 4 (26.67%, 100%) • 11 (73.33%, 78.57%) | • 0 • 3 (100%, 21.42) | 1 |
| CTLA-4 on pDC • Decrease • Increase | • 3 (20%, 100%) • 12 (80%, 80%) | • 0 • 3 (100%, 20%) | 1 |
| CTLA-4 on cDC1 • Decrease • Increase | • 4 (26.67%, 100%) • 11 (73.33%, 78.57%) | • 0 • 3 (100%, 21.42%) | 1 |
| CTLA-4 on cDC2 • Decrease • Increase | • 2 (13.33%, 100%) • 13 (86.67%, 81.25%) | • 0 • 3 (100%, 18.75%) | 1 |
| CTLA-4 on CD5⁺ cDC2 • Decrease • Increase | • 2 (13.33%, 100%) • 13 (86.67%, 81.25%) | • 0 • 3 (100%, 18.75%) | 1 |
| CTLA-4 on LDNs • Decrease • Increase | • 7 (46.67%, 100%) • 8 (53.33%, 72.73%) | • 0 • 3 (100%, 27.27%) | 0.245 |
| CTLA-4 on MDSCs • Decrease • Increase | • 5 (33.33%, 100%) • 10 (66.67%, 79.92%) | • 0 • 3 (100%, 23.08%) | 0.522 |

**Note**: Data are presented as patient counts with column and row percentages: n (column %, row %). The table evaluates the association between the direction of change in surface CTLA-4 expression (increase vs. decrease over time) and clinical response among patients receiving combination therapy (responders, n = 15; non-responders, n = 3). P values were calculated using two-sided Fisher’s exact tests because expected cell counts were less than 5. No statistically significant associations were detected across any subset (all *P* > 0.2), indicating that changes in CTLA-4 expression were not related to clinical outcome in this cohort. Together with previous analyses, this lack of significant modulation by either therapy regimen or response status supports the pooling of CTLA-4 data for downstream analyses.

## Supplementary Table 7. Hierarchical definitions of analytical layers for immune cell subset frequencies.

| **Layer** | **Denominator** | **Analytic Subsets (Numerator)** |
| --- | --- | --- |
| Leukocyte | CD45⁺ PBMCs | B cells; |
| CD3⁺ T cells; γδ T cells; CD4⁺ T cells; CD8⁺ T cells; Tregs |
| CD56⁺ NK cells; CD16⁺ NK cells; |
| myeloid cells; HLA-DR⁺ myeloid cells; |
| classical monocytes; Intermediate monocytes; Nonclassical monocytes; |
| pDCs; cDC1; cDC2; CD5⁺ cDC2; all DCs |
| LDNs; MDSCs; |
| T cell | CD3⁺ T cells | γδ Tcells; CD4⁺ T cells; CD8⁺ T cells; Tregs |
| Myeloid | Myeloid cells | classical monocytes; intermediate monocytes; nonclassical monocytes; |
| pDCs; cDC1; cDC2; CD5⁺ cDC2, all DCs |
| LDNs; MDSCs; |
| HLA-DR⁺ myeloid | HLA-DR⁺ myeloid cells | classical monocytes; intermediate monocytes; nonclassical monocytes; |
| pDCs; cDC1; cDC2; CD5⁺ cDC2; all DCs |
| NK cell | CD56⁺ NK cells | CD16⁺ NK cells |
| CD4 T cell | CD4⁺ T cells | Tregs |
| cDC2 | CD1c⁺ cDC2 | CD5⁺ cDC2 |

**Note**: The table outlines the gating hierarchy used to calculate the relative frequencies of the targeted immune cell populations. For each defined layer, subset frequencies were computed as the proportion of the analytic subset (numerator) within its respective parent population (denominator). Note that intermediate and non-classical monocytes were excluded from subsequent downstream analyses due to high technical variability across batches.

## Supplementary Table 8. Functional and activation markers evaluated across gated immune cell subsets.

| Subset | PD-1 | PD-L1 | LAG3 | CTLA-4 | CD69 | CD64 | CD54 | CCR4 | HLA-DR |
| --- | --- | --- | --- | --- | --- | --- | --- | --- | --- |
| B cell | ✓ | ✓ | ✓ | ✓ | ✓ | — | ✓ | — | ✓ |
| CD4 T | ✓ | ✓ | ✓ | ✓ | ✓ | — | — | ✓ | ✓ |
| CD8 T | ✓ | ✓ | ✓ | ✓ | ✓ | — | — | ✓ | ✓ |
| Treg | ✓ | ✓ | ✓ | ✓ | ✓ | — | — | ✓ | ✓ |
| NK cell | ✓ | ✓ | ✓ | ✓ | ✓ | — | — | — | ✓ |
| CD16⁺ NK cell | ✓ | ✓ | ✓ | ✓ | ✓ | — | — | — | ✓ |
| HLA-DR⁺ myeloid | ✓ | ✓ | ✓ | ✓ | — | ✓ | ✓ | — | ✓ |
| classical monocyte | ✓ | ✓ | ✓ | ✓ | — | ✓ | ✓ | — | ✓ |
| pDC | ✓ | ✓ | ✓ | ✓ | — | ✓ | ✓ | — | ✓ |
| cDC1 | ✓ | ✓ | ✓ | ✓ | — | ✓ | ✓ | — | ✓ |
| cDC2 | ✓ | ✓ | ✓ | ✓ | — | ✓ | ✓ | — | ✓ |
| CD5⁺ cDC2 | ✓ | ✓ | ✓ | ✓ | — | ✓ | ✓ | — | ✓ |
| LDN (PMN-MDSC) | ✓ | ✓ | ✓ | ✓ | — | ✓ | ✓ | — | ✓ |
| MDSC | ✓ | ✓ | ✓ | ✓ | — | ✓ | ✓ | — | ✓ |

**Note**: Check marks (✓) indicate the specific functional or activation markers quantified for the corresponding immune cell subset. Dashes (—) indicate markers that were not evaluated for that subset.

## Supplementary Table 9. List of the 92 serum soluble proteins quantified by "Olink Target 96 Inflammation" panel.

| ADA | CXCL6 | IFN-γ | IL-17C | MCP-3 | CD8A |
| --- | --- | --- | --- | --- | --- |
| ARTN | CXCL9 | IL-1α | IL-18 | MCP-4 | TSLP |
| AXIN1 | CXCL10 | IL-2 | IL-18R1 | CD244 | TNFB |
| β-NGF | CXCL11 | IL-2RB | IL-20 | NT-3 | TRANCE |
| CASP-8 | CST5 | IL-4 | IL-20RA | NRTN | TRAIL |
| CCL3 | DNER | IL-5 | IL-22 RA1 | OSM | TGF-α |
| CCL4 | CCL11 | IL-6 | IL-24 | OPG | TWEAK |
| CCL19 | 4E-BP1 | IL-7 | IL-33 | PD-L1 | TNF |
| CCL20 | FGF-21 | IL-8 | LAP TGF-β-1 | EN-RAGE | TNFSF14 |
| CCL23 | FGF-23 | IL-10 | LIF | SLAMF1 | TNFRSF9 |
| CCL25 | FGF-5 | IL-10RA | LIF-R | SIRT2 | uPA |
| CCL28 | FGF-19 | IL-10RB | CSF-1 | STAMBP | VEGF-A |
| CD40 | Flt3L | IL-12B | MMP-1 | SCF |  |
| CDCP1 | CX3CL1 | IL-13 | MMP-10 | ST1A1 |  |
| CXCL1 | GDNF | IL-15RA | MCP-1 | CD6 |  |
| CXCL5 | HGF | IL-17A | MCP-2 | CD5 |  |

## Supplementary Table 10. Statistical analysis of baseline immune cell frequencies stratified by clinical response.

|  | | Wilcoxon rank-sum test (3 month R n = 56 vs. NR n = 16) | | | Wilcoxon rank-sum test (6 month R n = 47 vs. NR n = 8) | | | Logistic regression (3 month R n = 56 vs. NR n = 16) | | |
| --- | --- | --- | --- | --- | --- | --- | --- | --- | --- | --- |
| **Layer** | **Subset** | **Z Statistic** | **P Value** | **FDR P** | **Z Statistic** | **P Value** | **FDR P** | **Odds ratio** | **P Value** | **FDR P** |
| Leukocyte layer | B cell | -1.233 | 0.223 | 0.699 | 0.095 | 0.935 | 0.935 | 1.181 | 0.704 | 0.912 |
| CD3 T cell | -1.057 | 0.297 | 0.764 | 1.218 | 0.233 | 0.419 | 1.251 | 0.315 | 0.898 |
| CD4 T cell | -0.474 | 0.643 | 0.891 | 1.456 | 0.151 | 0.407 | 1.157 | 0.580 | 0.912 |
| CD8 T cell | -0.163 | 0.877 | 0.963 | 0.573 | 0.582 | 0.805 | 1.172 | 0.676 | 0.912 |
| Treg | -0.122 | 0.909 | 0.963 | -0.764 | 0.459 | 0.689 | 1.325 | 0.912 | 0.912 |
| γδ T cell | -0.528 | 0.605 | 0.891 | -0.263 | 0.806 | 0.906 | 3.747 | 0.449 | 0.898 |
| NK cell | -0.555 | 0.587 | 0.891 | 0.095 | 0.935 | 0.935 | 0.904 | 0.826 | 0.912 |
| CD16+ NK cell | -0.704 | 0.489 | 0.891 | 0.286 | 0.788 | 0.906 | 0.907 | 0.838 | 0.912 |
| HLA-DR myeloid | 1.219 | 0.228 | 0.699 | -1.528 | 0.131 | 0.407 | 0.711 | 0.208 | 0.898 |
| myeloid | 1.205 | 0.233 | 0.699 | -1.313 | 0.197 | 0.419 | 0.738 | 0.219 | 0.898 |
| classical monocytes | 1.368 | 0.175 | 0.699 | -1.241 | 0.224 | 0.419 | 0.659 | 0.174 | 0.898 |
| all DCs | -0.176 | 0.867 | 0.963 | -2.626 | 0.007 | 0.043 | 4.800 | 0.831 | 0.912 |
| pDC | 0.190 | 0.856 | 0.963 | -1.432 | 0.158 | 0.407 | 11.168 | 0.809 | 0.912 |
| cDC1 | -0.027 | 0.984 | 0.984 | -2.435 | 0.013 | 0.060 | 0.000 | 0.367 | 0.898 |
| cDC2 | -0.501 | 0.624 | 0.891 | -3.080 | 0.001 | 0.022 | 8.784 | 0.898 | 0.912 |
| CD5+ cDC2 | -1.463 | 0.147 | 0.699 | -2.745 | 0.005 | 0.042 | 5.94E+16 | 0.405 | 0.898 |
| MDSC | 1.314 | 0.193 | 0.699 | -0.501 | 0.631 | 0.811 | 0.005 | 0.087 | 0.898 |
| LDN | 0.488 | 0.634 | 0.891 | 0.955 | 0.352 | 0.577 | 0.153 | 0.256 | 0.898 |
| T cell layer | CD4 T cell | 0.163 | 0.877 | 0.909 | 0.310 | 0.770 | 0.953 | 0.927 | 0.741 | 0.945 |
| CD8 T cell | 0.190 | 0.856 | 0.909 | 0.072 | 0.953 | 0.953 | 0.983 | 0.945 | 0.945 |
| γδ T cell | -0.122 | 0.909 | 0.909 | -0.621 | 0.550 | 0.953 | 1.758 | 0.549 | 0.945 |
| Treg | 0.406 | 0.692 | 0.909 | -1.456 | 0.151 | 0.605 | 0.361 | 0.405 | 0.945 |
| Myeloid layer | MDSC | 0.379 | 0.712 | 0.814 | 0.143 | 0.898 | 0.898 | 0.490 | 0.431 | 0.517 |
| LDN | 0.163 | 0.877 | 0.877 | 1.385 | 0.173 | 0.263 | 0.520 | 0.200 | 0.444 |
| classical monocytes | 1.707 | 0.089 | 0.325 | 1.313 | 0.197 | 0.263 | 0.701 | 0.243 | 0.444 |
| pDC | -0.677 | 0.506 | 0.675 | -1.122 | 0.273 | 0.312 | 34.041 | 0.452 | 0.517 |
| cDC1 | -1.070 | 0.291 | 0.465 | -1.838 | 0.067 | 0.195 | 2.63E+06 | 0.756 | 0.756 |
| cDC2 | -1.463 | 0.147 | 0.325 | -1.790 | 0.075 | 0.195 | 189.331 | 0.278 | 0.444 |
| CD5+ cDC2 | -2.736 | 0.006 | 0.044 | -1.790 | 0.075 | 0.195 | 3.06E+11 | 0.056 | 0.444 |
| all DCs | -1.409 | 0.162 | 0.325 | -1.671 | 0.098 | 0.195 | 27.600 | 0.246 | 0.444 |
| HLA-DR myeloid Layer | classical monocytes | 1.205 | 0.233 | 0.280 | 1.814 | 0.071 | 0.090 | 0.543 | 0.191 | 0.298 |
| pDC | -0.921 | 0.364 | 0.364 | -1.194 | 0.242 | 0.242 | 54.393 | 0.374 | 0.449 |
| cDC1 | -1.205 | 0.233 | 0.280 | -1.886 | 0.060 | 0.090 | 2.05E+08 | 0.643 | 0.643 |
| cDC2 | -1.571 | 0.118 | 0.237 | -1.790 | 0.075 | 0.090 | 230.442 | 0.199 | 0.298 |
| CD5+ cDC2 | -2.817 | 0.004 | 0.025 | -1.910 | 0.057 | 0.090 | 1.02E+11 | 0.038 | 0.231 |
| all DCs | -1.815 | 0.070 | 0.211 | -1.934 | 0.053 | 0.090 | 41.910 | 0.164 | 0.298 |
| cDC2 layer | CD5+ cDC2 | -2.276 | 0.022 | 0.022 | -0.119 | 0.916 | 0.916 | 2.231 | 0.013 | 0.013 |
| NK layer | CD16+ NK cell | -1.720 | 0.087 | 0.087 | 0.836 | 0.417 | 0.417 | 1.555 | 0.242 | 0.242 |
| CD4 T cell layer | Treg | 0.433 | 0.673 | 0.673 | -2.005 | 0.045 | 0.045 | 0.648 | 0.593 | 0.593 |

Note: Statistical comparisons of baseline immune cell proportions within layers between responders (R) and non-responders (NR). Three analyses were performed: a Wilcoxon rank-sum test for 3-month response (R, n = 56; NR, n = 16), a Wilcoxon rank-sum test for 6-month response (R, n = 47; NR, n = 8), and a logistic regression model for 3-month response.  The Z-statistic indicates directional abundance differences: a positive Z-statistic (Z > 0) denotes higher frequency in NR, while a negative Z-statistic (Z < 0) denotes higher frequency in R. Logistic regression odds ratio greater than 1 indicates that a higher frequency is associated with a greater probability of clinical response; odds ratio less than 1 indicates a higher frequency is associated with a greater probability of clinical nonresponse. *P* values were adjusted for multiple comparisons within each distinct cell layer using the Benjamini-Hochberg method. Yellow highlighting denotes subsets with an unadjusted *P* < 0.05 and a false discovery rate (FDR) < 0.1.

Supplementary Table 11. Statistical analysis of baseline functional marker expression stratified by clinical response.

|  | | Wilcoxon rank-sum test (3 month R n = 56 vs. NR n = 16) | | | Wilcoxon rank-sum test (6 month R n = 47 vs. NR n = 8) | | | Logistic regression (3 month R n = 56 vs. NR n = 16) | | |
| --- | --- | --- | --- | --- | --- | --- | --- | --- | --- | --- |
| **Cell type** | **Marker** | **Z Statistic** | **P Value** | **FDR P** | **Z Statistic** | **P Value** | **FDR P** | **Odds ratio** | **P Value** | **FDR P** |
| B cell | PD1 | -1.734 | 0.084 | 0.295 | -0.119 | 0.916 | 0.916 | 2.698 | 0.240 | 0.748 |
| PDL1 | 0.799 | 0.432 | 0.561 | 1.122 | 0.273 | 0.916 | 0.738 | 0.327 | 0.748 |
| LAG3 | 1.029 | 0.310 | 0.561 | 0.430 | 0.682 | 0.916 | 0.482 | 0.472 | 0.748 |
| CD69 | 0.799 | 0.432 | 0.561 | 0.812 | 0.431 | 0.916 | 0.807 | 0.744 | 0.748 |
| CTLA4 | 0.271 | 0.794 | 0.794 | 0.668 | 0.519 | 0.916 | 0.743 | 0.748 | 0.748 |
| CD54 | 3.102 | 0.002 | 0.011 | 0.454 | 0.665 | 0.916 | 0.112 | 0.013 | 0.094 |
| HLA-DR | 0.718 | 0.481 | 0.561 | 0.215 | 0.842 | 0.916 | 0.591 | 0.571 | 0.748 |
| CD4 T cell | PD1 | -0.677 | 0.506 | 1.000 | 0.310 | 0.770 | 0.898 | 1.403 | 0.568 | 0.916 |
| PDL1 | 1.111 | 0.273 | 1.000 | 0.931 | 0.365 | 0.898 | 0.395 | 0.391 | 0.916 |
| LAG3 | 0.488 | 0.634 | 1.000 | 0.716 | 0.489 | 0.898 | 0.494 | 0.607 | 0.916 |
| CD69 | 0.014 | 0.995 | 1.000 | 0.454 | 0.665 | 0.898 | 1.109 | 0.916 | 0.916 |
| CTLA4 | 0.163 | 0.877 | 1.000 | 0.501 | 0.631 | 0.898 | 0.826 | 0.841 | 0.916 |
| CCR4 | 0.000 | 1.000 | 1.000 | -0.095 | 0.935 | 0.935 | 1.095 | 0.897 | 0.916 |
| HLA-DR | 0.582 | 0.568 | 1.000 | -0.454 | 0.665 | 0.898 | 0.822 | 0.859 | 0.916 |
| PD1 | -1.585 | 0.115 | 0.806 | -0.072 | 0.953 | 0.953 | 1.786 | 0.331 | 0.901 |
| PDL1 | 0.542 | 0.596 | 0.877 | 1.504 | 0.138 | 0.707 | 0.630 | 0.650 | 0.901 |
| LAG3 | 0.163 | 0.877 | 0.877 | 0.907 | 0.378 | 0.707 | 0.870 | 0.901 | 0.901 |
| CD69 | -0.271 | 0.794 | 0.877 | 0.859 | 0.404 | 0.707 | 1.565 | 0.591 | 0.901 |
| CTLA4 | 0.271 | 0.794 | 0.877 | 0.859 | 0.404 | 0.707 | 0.818 | 0.824 | 0.901 |
| CCR4 | -0.488 | 0.634 | 0.877 | 0.334 | 0.752 | 0.877 | 1.821 | 0.504 | 0.901 |
| HLA-DR | 0.203 | 0.846 | 0.877 | -0.501 | 0.631 | 0.877 | 1.276 | 0.732 | 0.901 |
| Treg | PD1 | -0.650 | 0.524 | 0.899 | 1.027 | 0.317 | 0.726 | 1.443 | 0.516 | 0.978 |
| PDL1 | 0.826 | 0.416 | 0.899 | 1.003 | 0.328 | 0.726 | 0.778 | 0.668 | 0.978 |
| LAG3 | 0.257 | 0.804 | 0.899 | 0.692 | 0.503 | 0.726 | 1.020 | 0.978 | 0.978 |
| CD69 | -0.135 | 0.899 | 0.899 | 0.430 | 0.682 | 0.770 | 1.172 | 0.772 | 0.978 |
| CTLA4 | 0.325 | 0.753 | 0.899 | 0.668 | 0.519 | 0.726 | 0.943 | 0.937 | 0.978 |
| CCR4 | -0.230 | 0.825 | 0.899 | -0.310 | 0.770 | 0.770 | 1.087 | 0.907 | 0.978 |
| HLA-DR | -0.298 | 0.773 | 0.899 | -1.218 | 0.233 | 0.726 | 1.422 | 0.597 | 0.978 |
| NK cell | PD1 | -2.099 | 0.035 | 0.213 | -0.597 | 0.565 | 0.565 | 2.884 | 0.072 | 0.431 |
| PDL1 | 0.637 | 0.532 | 0.704 | 1.218 | 0.233 | 0.504 | 0.575 | 0.544 | 0.686 |
| LAG3 | 0.894 | 0.379 | 0.704 | 0.955 | 0.352 | 0.529 | 0.504 | 0.407 | 0.686 |
| CD69 | 0.555 | 0.587 | 0.704 | 1.170 | 0.252 | 0.504 | 0.625 | 0.572 | 0.686 |
| CTLA4 | 0.325 | 0.753 | 0.753 | 0.740 | 0.474 | 0.565 | 0.738 | 0.727 | 0.727 |
| HLA-DR | -1.314 | 0.193 | 0.579 | -1.599 | 0.114 | 0.504 | 1.446 | 0.512 | 0.686 |
| CD16+ NK cell | PD1 | -2.018 | 0.044 | 0.238 | -0.788 | 0.445 | 0.459 | 2.381 | 0.145 | 0.509 |
| PDL1 | 0.650 | 0.524 | 0.761 | 1.146 | 0.262 | 0.459 | 0.631 | 0.604 | 0.759 |
| LAG3 | 0.759 | 0.456 | 0.761 | 0.883 | 0.391 | 0.459 | 0.585 | 0.498 | 0.759 |
| CD69 | 0.488 | 0.634 | 0.761 | 1.074 | 0.294 | 0.459 | 0.722 | 0.692 | 0.759 |
| CTLA4 | 0.230 | 0.825 | 0.825 | 0.764 | 0.459 | 0.459 | 0.771 | 0.759 | 0.759 |
| HLA-DR | -1.761 | 0.079 | 0.238 | -1.456 | 0.151 | 0.459 | 2.588 | 0.170 | 0.509 |
| classic monocyte | PD1 | 0.542 | 0.596 | 0.762 | 1.122 | 0.273 | 0.382 | 0.862 | 0.731 | 0.731 |
| PDL1 | 1.327 | 0.189 | 0.660 | 2.435 | 0.013 | 0.093 | 0.433 | 0.138 | 0.496 |
| LAG3 | 0.461 | 0.653 | 0.762 | 1.886 | 0.060 | 0.210 | 0.676 | 0.626 | 0.731 |
| CTLA4 | 0.095 | 0.931 | 0.931 | 1.456 | 0.151 | 0.265 | 0.771 | 0.726 | 0.731 |
| CD64 | 1.463 | 0.147 | 0.660 | 1.671 | 0.098 | 0.228 | 0.409 | 0.142 | 0.496 |
| CD54 | 0.691 | 0.498 | 0.762 | 0.668 | 0.519 | 0.605 | 0.676 | 0.677 | 0.731 |
| HLA-DR | -0.880 | 0.386 | 0.762 | 0.525 | 0.614 | 0.614 | 2.194 | 0.286 | 0.667 |
| pDC | PD1 | -0.433 | 0.673 | 0.952 | 1.743 | 0.084 | 0.240 | 1.217 | 0.556 | 0.917 |
| PDL1 | 0.176 | 0.867 | 0.952 | 1.289 | 0.206 | 0.240 | 0.902 | 0.729 | 0.917 |
| LAG3 | -0.163 | 0.877 | 0.952 | 1.361 | 0.181 | 0.240 | 1.057 | 0.917 | 0.917 |
| CTLA4 | 0.312 | 0.763 | 0.952 | 1.528 | 0.131 | 0.240 | 0.923 | 0.891 | 0.917 |
| CD64 | 0.068 | 0.952 | 0.952 | 1.337 | 0.189 | 0.240 | 0.933 | 0.863 | 0.917 |
| CD54 | 0.515 | 0.615 | 0.952 | -1.313 | 0.197 | 0.240 | 0.823 | 0.694 | 0.917 |
| HLA-DR | -0.542 | 0.596 | 0.952 | -1.027 | 0.317 | 0.317 | 1.262 | 0.399 | 0.917 |
| cDC1 | PD1 | -1.368 | 0.175 | 0.973 | -0.048 | 0.972 | 0.972 | 1.486 | 0.227 | 0.794 |
| PDL1 | 0.406 | 0.692 | 0.973 | 2.101 | 0.035 | 0.122 | 0.847 | 0.605 | 0.935 |
| LAG3 | 0.379 | 0.712 | 0.973 | 2.340 | 0.018 | 0.122 | 0.857 | 0.775 | 0.935 |
| CTLA4 | 0.081 | 0.941 | 0.973 | 1.504 | 0.138 | 0.241 | 1.049 | 0.935 | 0.935 |
| CD64 | 0.122 | 0.909 | 0.973 | 1.767 | 0.079 | 0.185 | 0.954 | 0.886 | 0.935 |
| CD54 | 0.041 | 0.973 | 0.973 | 0.645 | 0.534 | 0.623 | 0.883 | 0.838 | 0.935 |
| HLA-DR | 0.867 | 0.393 | 0.973 | 1.122 | 0.273 | 0.382 | 0.389 | 0.201 | 0.794 |
| cDC2 | PD1 | -0.190 | 0.856 | 0.909 | 0.836 | 0.417 | 0.584 | 0.985 | 0.962 | 0.968 |
| PDL1 | 0.826 | 0.416 | 0.909 | 1.313 | 0.197 | 0.441 | 0.770 | 0.323 | 0.968 |
| LAG3 | -0.515 | 0.615 | 0.909 | 1.170 | 0.252 | 0.441 | 1.462 | 0.579 | 0.968 |
| CTLA4 | -0.122 | 0.909 | 0.909 | 1.647 | 0.103 | 0.360 | 1.185 | 0.824 | 0.968 |
| CD64 | 1.097 | 0.279 | 0.909 | 1.958 | 0.050 | 0.353 | 0.602 | 0.186 | 0.968 |
| CD54 | 0.325 | 0.753 | 0.909 | 0.501 | 0.631 | 0.736 | 1.031 | 0.968 | 0.968 |
| HLA-DR | -0.298 | 0.773 | 0.909 | 0.215 | 0.842 | 0.842 | 1.328 | 0.692 | 0.968 |
| CD5+ cDC2 | PD1 | -0.420 | 0.682 | 0.931 | 0.477 | 0.648 | 0.648 | 1.044 | 0.871 | 0.945 |
| PDL1 | 0.975 | 0.336 | 0.931 | 1.504 | 0.138 | 0.337 | 0.764 | 0.239 | 0.945 |
| LAG3 | -0.108 | 0.920 | 0.931 | 1.218 | 0.233 | 0.407 | 1.088 | 0.877 | 0.945 |
| CTLA4 | 0.095 | 0.931 | 0.931 | 1.480 | 0.144 | 0.337 | 1.045 | 0.945 | 0.945 |
| CD64 | 1.016 | 0.316 | 0.931 | 1.767 | 0.079 | 0.337 | 0.682 | 0.314 | 0.945 |
| CD54 | 0.244 | 0.814 | 0.931 | 0.597 | 0.565 | 0.648 | 1.050 | 0.944 | 0.945 |
| HLA-DR | 0.366 | 0.722 | 0.931 | 1.003 | 0.328 | 0.460 | 0.853 | 0.813 | 0.945 |
| LDN | PD1 | -1.531 | 0.128 | 0.660 | 0.095 | 0.935 | 0.935 | 1.326 | 0.368 | 0.582 |
| PDL1 | -0.772 | 0.448 | 0.784 | -0.477 | 0.648 | 0.935 | 1.894 | 0.353 | 0.582 |
| LAG3 | -0.420 | 0.682 | 0.843 | -0.239 | 0.824 | 0.935 | 1.719 | 0.499 | 0.582 |
| CTLA4 | -0.122 | 0.909 | 0.909 | -0.239 | 0.824 | 0.935 | 1.194 | 0.833 | 0.833 |
| CD64 | 0.366 | 0.722 | 0.843 | 0.740 | 0.474 | 0.935 | 0.725 | 0.427 | 0.582 |
| CD54 | -1.327 | 0.189 | 0.660 | -0.286 | 0.788 | 0.935 | 1.793 | 0.065 | 0.453 |
| HLA-DR | -0.853 | 0.401 | 0.784 | 0.358 | 0.734 | 0.935 | 1.381 | 0.367 | 0.582 |
| MDSC | PD1 | -0.217 | 0.835 | 0.984 | 1.814 | 0.071 | 0.404 | 1.126 | 0.840 | 0.982 |
| PDL1 | 0.027 | 0.984 | 0.984 | 1.408 | 0.166 | 0.404 | 0.890 | 0.834 | 0.982 |
| LAG3 | -0.041 | 0.973 | 0.984 | 0.668 | 0.519 | 0.726 | 1.094 | 0.878 | 0.982 |
| CTLA4 | 0.027 | 0.984 | 0.984 | 1.385 | 0.173 | 0.404 | 0.902 | 0.885 | 0.982 |
| CD64 | -0.041 | 0.973 | 0.984 | 0.740 | 0.474 | 0.726 | 0.993 | 0.982 | 0.982 |
| CD54 | 0.461 | 0.653 | 0.984 | 0.358 | 0.734 | 0.752 | 0.784 | 0.798 | 0.982 |
| HLA-DR | -2.086 | 0.037 | 0.257 | 0.334 | 0.752 | 0.752 | 1.974 | 0.034 | 0.240 |

Note: Statistical comparisons of baseline activation and functional marker expression within each immune cell type between responders (R) and non-responders (NR). Three analyses were performed: a Wilcoxon rank-sum test for 3-month response (R, n = 56; NR, n = 16), a Wilcoxon rank-sum test for 6-month response (R, n = 47; NR, n = 8), and a logistic regression model for 3-month response.  The Z-statistic indicates directional abundance differences: a positive Z-statistic (Z > 0) denotes higher expression in NR, while a negative Z-statistic (Z < 0) denotes higher expression in R. Logistic regression odds ratio greater than 1 indicates that a higher expression is associated with a greater probability of clinical response; odds ratio less than 1 indicates a higher expression is associated with a greater probability of clinical nonresponse. *P* values were adjusted within each cell type using the Benjamini-Hochberg method. Yellow highlighting denotes subsets with an unadjusted *P* < 0.05 and a false discovery rate (FDR) < 0.1.

## Supplementary Table 12. Statistical analysis of baseline serum protein level stratified by clinical response.

|  | Wilcoxon rank-sum test (3 month R n = 56 vs. NR n = 16) | | | Wilcoxon rank-sum test (6 month R n = 47 vs. NR n = 8) | | | Logistic regression (3 month R n = 56 vs. NR n = 16) | | |
| --- | --- | --- | --- | --- | --- | --- | --- | --- | --- |
| **Protein** | **Z Statistic** | **P Value** | **FDR P** | **Z Statistic** | **P Value** | **FDR P** | **Odds ratio** | **P Value** | **FDR P** |
| IL-8 | -0.461 | 0.653 | 0.858 | -0.931 | 0.365 | 0.994 | 0.965 | 0.860 | 0.963 |
| VEGFA | 1.531 | 0.128 | 0.733 | 0.621 | 0.550 | 0.994 | 0.499 | 0.150 | 0.657 |
| CD8A | 1.084 | 0.285 | 0.763 | 1.981 | 0.048 | 0.728 | 0.536 | 0.186 | 0.660 |
| MCP-3 | -1.341 | 0.184 | 0.734 | -0.167 | 0.879 | 0.994 | 1.691 | 0.169 | 0.657 |
| GDNF | 1.734 | 0.084 | 0.645 | 0.525 | 0.614 | 0.994 | 0.474 | 0.113 | 0.657 |
| CDCP1 | 0.081 | 0.941 | 0.995 | -0.072 | 0.953 | 0.994 | 0.934 | 0.836 | 0.963 |
| CD244 | 0.027 | 0.984 | 0.995 | 0.621 | 0.550 | 0.994 | 1.270 | 0.688 | 0.894 |
| IL-7 | 0.041 | 0.973 | 0.995 | -0.310 | 0.770 | 0.994 | 0.934 | 0.863 | 0.963 |
| OPG | 0.176 | 0.867 | 0.961 | 1.074 | 0.294 | 0.994 | 0.849 | 0.778 | 0.942 |
| LAP TGF-β-1 | -0.786 | 0.440 | 0.763 | 0.597 | 0.565 | 0.994 | 2.353 | 0.325 | 0.722 |
| uPA | -0.772 | 0.448 | 0.763 | -0.263 | 0.806 | 0.994 | 2.099 | 0.257 | 0.722 |
| IL-6 | 1.246 | 0.218 | 0.741 | 0.836 | 0.417 | 0.994 | 0.735 | 0.107 | 0.657 |
| IL-17C | 0.813 | 0.424 | 0.763 | 0.979 | 0.340 | 0.994 | 0.736 | 0.315 | 0.722 |
| MCP-1 | -2.316 | 0.020 | 0.493 | -1.719 | 0.088 | 0.994 | 4.400 | 0.010 | 0.467 |
| IL-17A | 0.542 | 0.596 | 0.831 | 0.645 | 0.534 | 0.994 | 0.718 | 0.312 | 0.722 |
| CXCL11 | -0.989 | 0.329 | 0.763 | -1.098 | 0.283 | 0.994 | 1.316 | 0.365 | 0.722 |
| AXIN1 | 1.625 | 0.106 | 0.716 | 0.454 | 0.665 | 0.994 | 0.497 | 0.058 | 0.657 |
| TRAIL | -0.772 | 0.448 | 0.763 | -0.716 | 0.489 | 0.994 | 3.815 | 0.086 | 0.657 |
| IL-20RA | 2.519 | 0.011 | 0.493 | -0.477 | 0.648 | 0.994 | 0.337 | 0.070 | 0.657 |
| CXCL9 | -0.799 | 0.432 | 0.763 | -0.191 | 0.861 | 0.994 | 1.203 | 0.472 | 0.775 |
| CST5 | -0.393 | 0.702 | 0.897 | -0.597 | 0.565 | 0.994 | 0.943 | 0.885 | 0.963 |
| IL-2RB | 0.867 | 0.392 | 0.763 | -0.406 | 0.697 | 0.994 | 0.414 | 0.264 | 0.722 |
| IL-1α | 0.312 | 0.763 | 0.911 | -0.836 | 0.417 | 0.994 | 1.046 | 0.951 | 0.975 |
| OSM | 1.761 | 0.079 | 0.645 | 1.337 | 0.189 | 0.994 | 0.634 | 0.129 | 0.657 |
| IL-2 | 0.203 | 0.846 | 0.961 | 0.836 | 0.417 | 0.994 | 0.856 | 0.888 | 0.963 |
| CXCL1 | 0.799 | 0.432 | 0.763 | 0.454 | 0.665 | 0.994 | 0.660 | 0.377 | 0.722 |
| TSLP | 1.097 | 0.279 | 0.763 | 0.239 | 0.824 | 0.994 | 0.522 | 0.133 | 0.657 |
| CCL4 | -0.569 | 0.577 | 0.831 | -0.883 | 0.391 | 0.994 | 1.036 | 0.900 | 0.963 |
| CD6 | -1.734 | 0.084 | 0.645 | 1.098 | 0.283 | 0.994 | 2.931 | 0.043 | 0.657 |
| SCF | -0.014 | 0.995 | 0.995 | -0.573 | 0.582 | 0.994 | 1.431 | 0.380 | 0.722 |
| IL-18 | 0.813 | 0.424 | 0.763 | 0.573 | 0.582 | 0.994 | 0.703 | 0.369 | 0.722 |
| SLAMF1 | 1.354 | 0.180 | 0.734 | 0.048 | 0.972 | 0.994 | 0.635 | 0.200 | 0.662 |
| TGF-α | 0.989 | 0.329 | 0.763 | 0.836 | 0.417 | 0.994 | 0.860 | 0.632 | 0.881 |
| MCP-4 | -1.829 | 0.068 | 0.645 | -1.480 | 0.144 | 0.994 | 2.361 | 0.084 | 0.657 |
| CCL11 | -0.400 | 0.694 | 0.897 | -2.005 | 0.045 | 0.728 | 1.255 | 0.760 | 0.932 |
| TNFSF14 | 0.962 | 0.343 | 0.763 | 0.692 | 0.503 | 0.994 | 0.811 | 0.597 | 0.858 |
| FGF-23 | 1.503 | 0.135 | 0.733 | -0.406 | 0.699 | 0.994 | 0.680 | 0.128 | 0.657 |
| IL-10RA | 0.488 | 0.634 | 0.858 | 0.143 | 0.898 | 0.994 | 1.233 | 0.523 | 0.816 |
| FGF-5 | -1.165 | 0.250 | 0.763 | -0.024 | 0.991 | 1.000 | 2.076 | 0.381 | 0.722 |
| MMP-1 | 0.041 | 0.973 | 0.995 | 0.191 | 0.861 | 0.994 | 1.032 | 0.953 | 0.975 |
| LIF-R | -0.135 | 0.897 | 0.971 | 1.289 | 0.205 | 0.994 | 1.388 | 0.618 | 0.874 |
| FGF-21 | 0.867 | 0.393 | 0.763 | 0.072 | 0.953 | 0.994 | 0.893 | 0.427 | 0.727 |
| CCL19 | 0.880 | 0.386 | 0.763 | 0.000 | 1.000 | 1.000 | 0.840 | 0.538 | 0.826 |
| IL-15RA | -0.203 | 0.846 | 0.961 | -0.167 | 0.879 | 0.994 | 0.906 | 0.894 | 0.963 |
| IL-10RB | 1.057 | 0.297 | 0.763 | 1.432 | 0.158 | 0.994 | 0.425 | 0.304 | 0.722 |
| IL-22 RA1 | -1.815 | 0.070 | 0.645 | -0.883 | 0.391 | 0.994 | 2.993 | 0.069 | 0.657 |
| IL-18R1 | 2.289 | 0.021 | 0.493 | 2.363 | 0.017 | 0.728 | 0.326 | 0.047 | 0.657 |
| PD-L1 | 1.016 | 0.316 | 0.763 | 1.194 | 0.242 | 0.994 | 0.683 | 0.422 | 0.727 |
| β-NGF | -0.352 | 0.732 | 0.898 | -0.430 | 0.682 | 0.994 | 4.391 | 0.419 | 0.727 |
| CXCL5 | -0.691 | 0.498 | 0.803 | -0.836 | 0.417 | 0.994 | 1.334 | 0.464 | 0.775 |
| TRANCE | -0.664 | 0.515 | 0.816 | -0.430 | 0.682 | 0.994 | 1.268 | 0.420 | 0.727 |
| HGF | 1.436 | 0.154 | 0.734 | 0.812 | 0.431 | 0.994 | 0.560 | 0.186 | 0.660 |
| IL-12B | 0.014 | 0.995 | 0.995 | 0.048 | 0.972 | 0.994 | 1.119 | 0.681 | 0.894 |
| IL-24 | 0.163 | 0.877 | 0.961 | -0.358 | 0.734 | 0.994 | 1.330 | 0.518 | 0.816 |
| IL-13 | -0.650 | 0.524 | 0.816 | -0.883 | 0.391 | 0.994 | 1.441 | 0.339 | 0.722 |
| ARTN | 0.759 | 0.456 | 0.763 | -1.671 | 0.098 | 0.994 | 1.034 | 0.933 | 0.975 |
| MMP-10 | 0.352 | 0.732 | 0.898 | -1.241 | 0.224 | 0.994 | 0.625 | 0.214 | 0.665 |
| IL-10 | 1.327 | 0.189 | 0.734 | 1.241 | 0.224 | 0.994 | 0.839 | 0.569 | 0.858 |
| TNF | -0.853 | 0.401 | 0.763 | 0.286 | 0.788 | 0.994 | 1.178 | 0.690 | 0.894 |
| CCL23 | 0.230 | 0.825 | 0.961 | 0.597 | 0.565 | 0.994 | 0.727 | 0.588 | 0.858 |
| CD5 | -0.555 | 0.587 | 0.831 | 0.454 | 0.665 | 0.994 | 0.980 | 0.971 | 0.975 |
| CCL3 | -0.582 | 0.568 | 0.831 | -0.095 | 0.935 | 0.994 | 1.021 | 0.922 | 0.975 |
| Flt3L | -0.582 | 0.568 | 0.831 | -0.095 | 0.935 | 0.994 | 1.413 | 0.327 | 0.722 |
| CXCL6 | 0.352 | 0.732 | 0.898 | 0.167 | 0.879 | 0.994 | 0.818 | 0.667 | 0.894 |
| CXCL10 | -0.935 | 0.357 | 0.763 | -0.692 | 0.503 | 0.994 | 1.373 | 0.282 | 0.722 |
| 4E-BP1 | 2.018 | 0.044 | 0.645 | 1.170 | 0.252 | 0.994 | 0.663 | 0.044 | 0.657 |
| IL-20 | 0.528 | 0.605 | 0.831 | -0.095 | 0.935 | 0.994 | 0.320 | 0.171 | 0.657 |
| SIRT2 | 1.531 | 0.128 | 0.733 | 0.215 | 0.842 | 0.994 | 0.753 | 0.100 | 0.657 |
| CCL28 | -0.528 | 0.605 | 0.831 | -0.072 | 0.953 | 0.994 | 0.924 | 0.886 | 0.963 |
| DNER | 1.057 | 0.297 | 0.763 | 1.576 | 0.119 | 0.994 | 0.710 | 0.654 | 0.894 |
| EN-RAGE | 1.747 | 0.082 | 0.645 | 0.621 | 0.550 | 0.994 | 0.674 | 0.305 | 0.722 |
| CD40 | 0.014 | 0.995 | 0.995 | 0.597 | 0.565 | 0.994 | 0.869 | 0.817 | 0.963 |
| IL-33 | -0.813 | 0.424 | 0.763 | -2.101 | 0.035 | 0.728 | 0.784 | 0.517 | 0.816 |
| IFN-γ | -1.436 | 0.154 | 0.734 | 0.406 | 0.699 | 0.994 | 1.308 | 0.217 | 0.665 |
| FGF-19 | 0.230 | 0.825 | 0.961 | 0.764 | 0.459 | 0.994 | 0.906 | 0.722 | 0.911 |
| IL-4 | 1.273 | 0.208 | 0.734 | 0.358 | 0.734 | 0.994 | 0.614 | 0.268 | 0.722 |
| LIF | 1.314 | 0.193 | 0.734 | 0.716 | 0.489 | 0.994 | 0.926 | 0.886 | 0.963 |
| NRTN | -0.176 | 0.867 | 0.961 | -2.077 | 0.037 | 0.728 | 1.009 | 0.975 | 0.975 |
| MCP-2 | -2.574 | 0.009 | 0.493 | -1.122 | 0.273 | 0.994 | 3.818 | 0.007 | 0.467 |
| CASP-8 | 1.815 | 0.070 | 0.645 | 0.143 | 0.898 | 0.994 | 0.572 | 0.156 | 0.657 |
| CCL25 | 0.596 | 0.559 | 0.831 | 1.981 | 0.048 | 0.728 | 0.837 | 0.737 | 0.917 |
| CX3CL1 | 0.312 | 0.763 | 0.911 | -0.310 | 0.770 | 0.994 | 0.834 | 0.723 | 0.911 |
| TNFRSF9 | 1.043 | 0.303 | 0.763 | 0.645 | 0.534 | 0.994 | 0.681 | 0.384 | 0.722 |
| NT-3 | -0.880 | 0.386 | 0.763 | -0.549 | 0.598 | 0.994 | 2.319 | 0.202 | 0.662 |
| TWEAK | 0.461 | 0.653 | 0.858 | -0.573 | 0.582 | 0.994 | 0.704 | 0.584 | 0.858 |
| CCL20 | 1.612 | 0.109 | 0.716 | 0.692 | 0.503 | 0.994 | 0.707 | 0.107 | 0.657 |
| ST1A1 | -1.395 | 0.167 | 0.734 | -0.143 | 0.898 | 0.994 | 1.459 | 0.113 | 0.657 |
| STAMBP | 1.287 | 0.203 | 0.734 | 0.191 | 0.861 | 0.994 | 0.728 | 0.164 | 0.657 |
| IL-5 | -1.151 | 0.255 | 0.763 | -0.621 | 0.550 | 0.994 | 1.529 | 0.167 | 0.657 |
| ADA | 1.070 | 0.291 | 0.763 | -0.048 | 0.972 | 0.994 | 0.677 | 0.308 | 0.722 |
| TNFB | -0.731 | 0.472 | 0.776 | 0.143 | 0.898 | 0.994 | 1.527 | 0.335 | 0.722 |
| CSF-1 | 1.002 | 0.323 | 0.763 | 0.907 | 0.378 | 0.994 | 0.380 | 0.397 | 0.727 |

Note: Statistical comparisons of baseline serum protein level between responders (R) and non-responders (NR). Three analyses were performed: a Wilcoxon rank-sum test for 3-month response (R, n = 56; NR, n = 16), a Wilcoxon rank-sum test for 6-month response (R, n = 47; NR, n = 8), and a logistic regression model for 3-month response.  The Z-statistic indicates directional abundance differences: a positive Z-statistic (Z > 0) denotes higher level in NR, while a negative Z-statistic (Z < 0) denotes higher level in R. Logistic regression odds ratio greater than 1 indicates that a higher level is associated with a greater probability of clinical response; odds ratio less than 1 indicates a higher level is associated with a greater probability of clinical nonresponse. *P* values were adjusted globally across all 92 proteins using the Benjamini-Hochberg method. No proteins retained statistical significance (FDR < 0.1) following global adjustment.

## Supplementary Table 13. Statistical analysis of longitudinal changes in immune cell frequencies

|  | | whole cohort n = 51 pairs | |  | R: n = 44 pairs | |  | NR: n = 7 pairs | |
| --- | --- | --- | --- | --- | --- | --- | --- | --- | --- |
|  | **Subset** | **RBC** | **P Value** |  | **RBC** | **P Value** |  | **RBC** | **P Value** |
| **Leukocyte layer** | B cell | -0.0196 | 0.6723 |  | 0.0455 | 0.4985 |  | -0.4286 | 0.4688 |
| CD3 T cell | 0.1765 | 0.0130 |  | 0.1818 | 0.0409 |  | 0.1429 | 0.2188 |
| CD4 T cell | 0.2549 | 0.0524 |  | 0.2727 | 0.0990 |  | 0.1429 | 0.5781 |
| CD8 T cell | 0.2549 | 0.0329 |  | 0.2273 | 0.0966 |  | 0.4286 | 0.1563 |
| Treg | 0.1765 | 0.0120 |  | 0.2273 | 0.0046 |  | -0.1429 | 0.8125 |
| γδ Tcells | 0.1765 | 0.2269 |  | 0.1818 | 0.1833 |  | 0.1429 | 0.9375 |
| NK cell | 0.1373 | 0.8344 |  | 0.1818 | 0.7507 |  | -0.1429 | 0.8125 |
| CD16+ NK | 0.1765 | 0.5800 |  | 0.2273 | 0.5437 |  | -0.1429 | 0.8125 |
| HLA-DR Myeloid | -0.2157 | 0.0417 |  | -0.2273 | 0.0332 |  | -0.1429 | 0.9375 |
| Myeloid | -0.2157 | 0.0245 |  | -0.2273 | 0.0353 |  | -0.1429 | 0.4688 |
| classical Monocyte | -0.1373 | 0.0095 |  | -0.1364 | 0.0095 |  | -0.1429 | 0.8125 |
| DCs | -0.2549 | 0.0408 |  | -0.2273 | 0.0514 |  | -0.4286 | 0.5781 |
| pDC | -0.0588 | 0.2858 |  | -0.0909 | 0.1833 |  | 0.1429 | 0.8125 |
| cDC1 | -0.2941 | 0.0018 |  | -0.2273 | 0.0139 |  | -0.7143 | 0.0781 |
| cDC2 | -0.3333 | 0.0479 |  | -0.2727 | 0.1257 |  | -0.7143 | 0.1094 |
| CD5+ cDC2 | -0.2549 | 0.0624 |  | -0.2273 | 0.0966 |  | -0.4286 | 0.3750 |
| MDSC | -0.0588 | 0.3302 |  | 0.0909 | 0.9493 |  | -1.0000 | 0.0156 |
| LDN | -0.0980 | 0.7274 |  | -0.0909 | 0.8852 |  | -0.1429 | 0.6875 |
| **T cell layer** | CD4 T cell | -0.1765 | 0.2858 |  | -0.1818 | 0.4839 |  | -0.1429 | 0.4688 |
| CD8 T cell | 0.2157 | 0.3256 |  | 0.1818 | 0.6480 |  | 0.4286 | 0.2969 |
| γδ Tcells | 0.0588 | 0.9075 |  | 0.0455 | 0.9401 |  | 0.1429 | 0.9375 |
| Treg | 0.1765 | 0.1126 |  | 0.2273 | 0.0486 |  | -0.1429 | 0.5781 |
| **Myeloid layer** | MDSC | 0.0196 | 0.8344 |  | 0.1818 | 0.2034 |  | -1.0000 | 0.0156 |
| LDN | 0.1373 | 0.2901 |  | 0.1364 | 0.1833 |  | 0.1429 | 0.9375 |
| classical monocyte | -0.2157 | 0.0216 |  | -0.2727 | 0.0073 |  | 0.1429 | 0.6875 |
| pDC | 0.0980 | 0.9963 |  | 0.0455 | 0.6986 |  | 0.4286 | 0.3750 |
| cDC1 | -0.2157 | 0.0264 |  | -0.1818 | 0.0810 |  | -0.4286 | 0.1563 |
| cDC2 | -0.2157 | 0.4882 |  | -0.1364 | 0.8038 |  | -0.7143 | 0.0469 |
| CD5+ cDC2 | -0.2549 | 0.3688 |  | -0.2727 | 0.5134 |  | -0.1429 | 0.3750 |
| DCs | -0.0980 | 0.5301 |  | -0.1364 | 0.5437 |  | 0.1429 | 0.9375 |
| **HLA-DR myeloid layer** | classical monocyte | -0.2941 | 0.0134 |  | -0.3182 | 0.0113 |  | -0.1429 | 0.5781 |
| pDC | 0.1373 | 0.6058 |  | 0.0909 | 0.9218 |  | 0.4286 | 0.3750 |
| cDC1 | -0.1373 | 0.0598 |  | -0.0909 | 0.2206 |  | -0.4286 | 0.1094 |
| cDC2 | -0.1765 | 0.6058 |  | -0.0909 | 0.9401 |  | -0.7143 | 0.0313 |
| CD5+ cDC2 | -0.1765 | 0.4708 |  | -0.1364 | 0.6480 |  | -0.4286 | 0.1563 |
| DCs | -0.0980 | 0.7066 |  | -0.1364 | 0.7860 |  | 0.1429 | 0.8125 |
| **cDC2 layer** | CD5+ cDC2 | -0.2157 | 0.2162 |  | -0.3182 | 0.0640 |  | 0.4286 | 0.0781 |
| **NK layer** | CD16+ NK | 0.4118 | 0.0005 |  | 0.3636 | 0.0030 |  | 0.7143 | 0.0469 |
| **CD4 Tcell layer** | Treg | 0.1765 | 0.0788 |  | 0.2273 | 0.0543 |  | -0.1429 | 0.8125 |

**Note:** Statistical comparisons of immune cell subset proportions between paired baseline and three-month post-treatment samples. *P* values were calculated using the Wilcoxon signed-rank test for the whole cohort (n = 51 pairs), responders (R, n = 44 pairs), and non-responders (NR, n = 7 pairs). Background highlighting denotes *P* < 0.05 within specific comparison groups: yellow for the whole cohort, brown for responders, and purple for non-responders. The rank biserial correlation (RBC) quantifies the effect size and directionality of longitudinal changes. Positive RBC values indicate increased abundance at 3 months compared to baseline, and negative RBC values indicate decreased abundance at 3 months. The magnitude of the RBC ranges from -1 to 1 and reflects the strength of the monotonic trend, with absolute values ≥ 0.3 suggesting moderate effects.

## Supplementary Table 14. Statistical analysis of longitudinal changes in marker expression

|  | | whole cohort n = 51 pairs | |  | R: n = 44 pairs | |  | NR: n = 7 pairs | |
| --- | --- | --- | --- | --- | --- | --- | --- | --- | --- |
| **Cell type** | **Marker** | **RBC** | **P Value** |  | **RBC** | **P Value** |  | **RBC** | **P Value** |
| B cell | PD1 | -0.0196 | 0.5301 |  | 0.0455 | 0.4078 |  | -0.4286 | 0.9375 |
| PDL1 | 0.2549 | 0.1022 |  | 0.1818 | 0.2251 |  | 0.7143 | 0.1563 |
| LAG3 | 0.2157 | 0.0560 |  | 0.1364 | 0.1993 |  | 0.7143 | 0.0781 |
| CD69 | 0.4118 | 0.0056 |  | 0.3182 | 0.0499 |  | 1.0000 | 0.0156 |
| CTLA4 | 0.2941 | 0.0080 |  | 0.2727 | 0.0332 |  | 0.4286 | 0.1094 |
| CD54 | 0.3725 | 0.0116 |  | 0.2727 | 0.0711 |  | 1.0000 | 0.0156 |
| HLA-DR | 0.2941 | 0.0638 |  | 0.2727 | 0.1347 |  | 0.4286 | 0.2969 |
| CD4 T cell | PD1 | -0.6863 | 0.0000 |  | -0.6364 | 0.0000 |  | -1.0000 | 0.0156 |
| PDL1 | 0.5294 | 0.0004 |  | 0.4545 | 0.0054 |  | 1.0000 | 0.0156 |
| LAG3 | 0.0980 | 0.2128 |  | -0.0455 | 0.5437 |  | 1.0000 | 0.0156 |
| CD69 | 0.2941 | 0.0120 |  | 0.1818 | 0.0942 |  | 1.0000 | 0.0156 |
| CTLA4 | 0.2549 | 0.0130 |  | 0.2273 | 0.0574 |  | 0.4286 | 0.0781 |
| CCR4 | 0.6078 | 0.0000 |  | 0.5455 | 0.0001 |  | 1.0000 | 0.0156 |
| HLA-DR | -0.2941 | 0.0110 |  | -0.3182 | 0.0079 |  | -0.1429 | 0.8125 |
| PD1 | -0.6471 | 0.0000 |  | -0.6364 | 0.0000 |  | -0.7143 | 0.0469 |
| PDL1 | 0.5294 | 0.0001 |  | 0.4545 | 0.0024 |  | 1.0000 | 0.0156 |
| LAG3 | 0.1765 | 0.0239 |  | 0.0455 | 0.1410 |  | 1.0000 | 0.0156 |
| CD69 | 0.4118 | 0.0022 |  | 0.3182 | 0.0353 |  | 1.0000 | 0.0156 |
| CTLA4 | 0.3333 | 0.0021 |  | 0.2727 | 0.0195 |  | 0.7143 | 0.0313 |
| CCR4 | 0.3333 | 0.0065 |  | 0.2273 | 0.0657 |  | 1.0000 | 0.0156 |
| HLA-DR | -0.0196 | 0.9297 |  | -0.0909 | 0.5908 |  | 0.4286 | 0.2969 |
| Treg | PD1 | -0.6863 | 0.0000 |  | -0.6818 | 0.0000 |  | -0.7143 | 0.0313 |
| PDL1 | 0.4118 | 0.0003 |  | 0.3182 | 0.0050 |  | 1.0000 | 0.0156 |
| LAG3 | 0.1373 | 0.0337 |  | 0.0000 | 0.1872 |  | 1.0000 | 0.0156 |
| CD69 | 0.2941 | 0.0080 |  | 0.1818 | 0.0750 |  | 1.0000 | 0.0156 |
| CTLA4 | 0.2941 | 0.0041 |  | 0.2273 | 0.0342 |  | 0.7143 | 0.0313 |
| CCR4 | 0.3333 | 0.0025 |  | 0.2727 | 0.0294 |  | 0.7143 | 0.0313 |
| HLA-DR | 0.2157 | 0.1285 |  | 0.1364 | 0.4484 |  | 0.7143 | 0.0469 |
| NK cell | PD1 | 0.1373 | 0.1408 |  | 0.0909 | 0.3332 |  | 0.4286 | 0.1563 |
| PDL1 | 0.3725 | 0.0021 |  | 0.2727 | 0.0252 |  | 1.0000 | 0.0156 |
| LAG3 | 0.2549 | 0.0071 |  | 0.1364 | 0.0657 |  | 1.0000 | 0.0156 |
| CD69 | 0.4902 | 0.0001 |  | 0.4091 | 0.0027 |  | 1.0000 | 0.0156 |
| CTLA4 | 0.4118 | 0.0011 |  | 0.3636 | 0.0079 |  | 0.7143 | 0.0469 |
| HLA-DR | 0.3333 | 0.0046 |  | 0.3182 | 0.0117 |  | 0.4286 | 0.2969 |
| CD16+ NK cell | PD1 | 0.0196 | 0.2233 |  | -0.0455 | 0.4912 |  | 0.4286 | 0.2188 |
| PDL1 | 0.3333 | 0.0078 |  | 0.2273 | 0.0675 |  | 1.0000 | 0.0156 |
| LAG3 | 0.2941 | 0.0153 |  | 0.1818 | 0.1172 |  | 1.0000 | 0.0156 |
| CD69 | 0.4902 | 0.0004 |  | 0.4091 | 0.0091 |  | 1.0000 | 0.0156 |
| CTLA4 | 0.4118 | 0.0013 |  | 0.3636 | 0.0088 |  | 0.7143 | 0.0469 |
| HLA-DR | 0.4118 | 0.0025 |  | 0.4091 | 0.0091 |  | 0.4286 | 0.1563 |
| classic monocyte | PD1 | 0.5294 | 0.0000 |  | 0.5455 | 0.0000 |  | 0.4286 | 0.0781 |
| PDL1 | 0.3333 | 0.0010 |  | 0.2273 | 0.0126 |  | 1.0000 | 0.0156 |
| LAG3 | 0.1765 | 0.0153 |  | 0.0455 | 0.1040 |  | 1.0000 | 0.0156 |
| CTLA4 | 0.2941 | 0.0004 |  | 0.1818 | 0.0095 |  | 1.0000 | 0.0156 |
| CD64 | -0.0196 | 0.5240 |  | -0.0909 | 0.2994 |  | 0.4286 | 0.3750 |
| CD54 | -0.1765 | 0.6454 |  | -0.2273 | 0.4415 |  | 0.1429 | 0.5781 |
| HLA-DR | -0.0980 | 0.9592 |  | -0.1818 | 0.5592 |  | 0.4286 | 0.2188 |
| pDC | PD1 | 0.2941 | 0.0003 |  | 0.1818 | 0.0076 |  | 1.0000 | 0.0156 |
| PDL1 | 0.2549 | 0.0017 |  | 0.1364 | 0.0397 |  | 1.0000 | 0.0156 |
| LAG3 | 0.1765 | 0.0184 |  | 0.0455 | 0.2296 |  | 1.0000 | 0.0156 |
| CTLA4 | 0.2157 | 0.0014 |  | 0.0909 | 0.0353 |  | 1.0000 | 0.0156 |
| CD64 | 0.2941 | 0.0014 |  | 0.1818 | 0.0386 |  | 1.0000 | 0.0156 |
| CD54 | -0.3333 | 0.0027 |  | -0.2727 | 0.0285 |  | -0.7143 | 0.0313 |
| HLA-DR | -0.3333 | 0.0059 |  | -0.2273 | 0.0769 |  | -1.0000 | 0.0156 |
| cDC1 | PD1 | 0.2549 | 0.0321 |  | 0.2273 | 0.1172 |  | 0.4286 | 0.0781 |
| PDL1 | 0.3725 | 0.0007 |  | 0.2727 | 0.0117 |  | 1.0000 | 0.0156 |
| LAG3 | 0.2157 | 0.0061 |  | 0.1364 | 0.0409 |  | 0.7143 | 0.0313 |
| CTLA4 | 0.3333 | 0.0028 |  | 0.2273 | 0.0332 |  | 1.0000 | 0.0156 |
| CD64 | 0.4510 | 0.0003 |  | 0.3636 | 0.0068 |  | 1.0000 | 0.0156 |
| CD54 | -0.2157 | 0.2651 |  | -0.2273 | 0.3332 |  | -0.1429 | 0.5781 |
| HLA-DR | -0.0588 | 0.6997 |  | -0.0909 | 0.9862 |  | 0.1429 | 0.3750 |
| cDC2 | PD1 | 0.5686 | 0.0000 |  | 0.5909 | 0.0000 |  | 0.4286 | 0.1094 |
| PDL1 | 0.3725 | 0.0004 |  | 0.2727 | 0.0088 |  | 1.0000 | 0.0156 |
| LAG3 | 0.1765 | 0.1460 |  | 0.0909 | 0.5059 |  | 0.7143 | 0.0469 |
| CTLA4 | 0.4118 | 0.0010 |  | 0.3182 | 0.0171 |  | 1.0000 | 0.0156 |
| CD64 | 0.0196 | 0.6723 |  | -0.0909 | 0.9585 |  | 0.7143 | 0.0313 |
| CD54 | -0.2157 | 0.0292 |  | -0.3182 | 0.0095 |  | 0.4286 | 0.6875 |
| HLA-DR | -0.3333 | 0.0082 |  | -0.3182 | 0.0188 |  | -0.4286 | 0.2188 |
| CD5+ cDC2 | PD1 | 0.4902 | 0.0000 |  | 0.5000 | 0.0003 |  | 0.4286 | 0.1094 |
| PDL1 | 0.3725 | 0.0006 |  | 0.2727 | 0.0160 |  | 1.0000 | 0.0156 |
| LAG3 | 0.1765 | 0.1309 |  | 0.0909 | 0.4985 |  | 0.7143 | 0.0469 |
| CTLA4 | 0.2549 | 0.0025 |  | 0.1818 | 0.0294 |  | 0.7143 | 0.0313 |
| CD64 | 0.2157 | 0.1434 |  | 0.0909 | 0.5670 |  | 1.0000 | 0.0156 |
| CD54 | -0.2941 | 0.0264 |  | -0.4091 | 0.0065 |  | 0.4286 | 0.8125 |
| HLA-DR | -0.4510 | 0.0030 |  | -0.4091 | 0.0091 |  | -0.7143 | 0.1563 |
| LDN | PD1 | -0.1373 | 0.0890 |  | -0.1364 | 0.0942 |  | -0.1429 | 0.6875 |
| PDL1 | 0.0196 | 0.6723 |  | 0.0000 | 0.9954 |  | 0.1429 | 0.2969 |
| LAG3 | 0.2549 | 0.0306 |  | 0.2727 | 0.1172 |  | 0.1429 | 0.2188 |
| CTLA4 | 0.0588 | 0.3349 |  | 0.0455 | 0.4912 |  | 0.1429 | 0.3750 |
| CD64 | 0.2157 | 0.0251 |  | 0.1818 | 0.0675 |  | 0.4286 | 0.2188 |
| CD54 | 0.1373 | 0.2651 |  | 0.0909 | 0.4346 |  | 0.4286 | 0.2969 |
| HLA-DR | 0.5294 | 0.0001 |  | 0.5000 | 0.0007 |  | 0.7143 | 0.0469 |
| MDSC | PD1 | 0.3725 | 0.0010 |  | 0.3182 | 0.0117 |  | 0.7143 | 0.0313 |
| PDL1 | 0.3333 | 0.0036 |  | 0.2273 | 0.0543 |  | 1.0000 | 0.0156 |
| LAG3 | 0.2941 | 0.0090 |  | 0.1818 | 0.0966 |  | 1.0000 | 0.0156 |
| CTLA4 | 0.2941 | 0.0034 |  | 0.1818 | 0.0421 |  | 1.0000 | 0.0156 |
| CD64 | 0.0588 | 0.2494 |  | -0.0909 | 0.9862 |  | 1.0000 | 0.0156 |
| CD54 | 0.0980 | 0.2455 |  | -0.0455 | 0.8761 |  | 1.0000 | 0.0156 |
| HLA-DR | 0.0196 | 0.1309 |  | -0.1364 | 0.7949 |  | 1.0000 | 0.0156 |

**Note:** Statistical comparisons of functional and activation marker expression on each cell type between paired baseline and three-month post-treatment samples. *P* values were calculated using the Wilcoxon signed-rank test for the whole cohort (n = 51 pairs), responders (R, n = 44 pairs), and non-responders (NR, n = 7 pairs). Background highlighting denotes *P* < 0.05 within specific comparison groups: yellow for the whole cohort, brown for responders, and purple for non-responders. The rank biserial correlation (RBC) quantifies the effect size and directionality of longitudinal changes. Positive RBC values indicate increased abundance at 3 months compared to baseline, and negative RBC values indicate decreased abundance at 3 months. The magnitude of the RBC ranges from -1 to 1 and reflects the strength of the monotonic trend, with absolute values ≥ 0.3 suggesting moderate effects.

## Supplementary Table 15. Statistical associations of baseline and longitudinal gut microbial diversity with clinical response and patient metadata.

| Baseline | | | | |
| --- | --- | --- | --- | --- |
|  | Richness (S) P value | Shannon Index (H) P value | Unbiased_Simpson Index (Unbiased_D) P value | Beta diversity  (PermANOVA) |
| Response R (n = 49) NR (n = 14) | 0.34 | 0.2 | 0.27 | 0.014 |
| irAE severity Mild (n = 53) Severe (n = 10) | 0.79 | 0.93 | 0.74 | 0.66 |
| Gender Male (n = 40) Female (n = 23) | 0.14 | 0.25 | 0.39 | 0.35 |
| Pre-treatment antibiotic use  (past 3 months) Yes (n = 23) No (n = 40) | 0.53 | 0.99 | 0.49 | 0.99 |
| Age (38 - 85) (n = 63) | rho =0.06 P = 0.63 | rho = 0.014  P = 0.91 | rho = 0.008 P =0.94 | 0.29 |
| Cancer Type Melanoma (n = 25) NSCLC (n = 21) Renal (n = 8) cSCC (n = 7) HNC (n = 2) | 0.86 | 0.93 | 0.65 | 0.16 |
| Longitudinal change (baseline vs. 3-month samples) | | | | |
|  | Richness (S) P value | Shannon Index (H) P value | Unbiased_Simpson Index (Unbiased_D) P value | Beta diversity  (PermANOVA) |
| All patients (n = 38 pairs) | 0.43 | 0.9 | 0.59 | 0.42 |
| Responders (n = 34 pairs) | 0.32 | 0.8 | 0.8 | 0.43 |
| Non-responders (n = 4 pairs) | 0.58 | 0.27 | 0.47 | 1 |
| irAE_present (n = 22 pairs) | 0.59 | 0.86 | 0.86 | 0.46 |
| irAE_severe (n = 4 pairs) | 0.14 | 0.14 | 0.27 | 0.82 |
| Combined therapy (anti-PD-1 + anti-CTLA4) (n = 11 pairs) | 0.2 | 0.29 | 0.48 | 0.97 |

**Note:** *P* values for baseline alpha diversity (Richness, Shannon Index, and Unbiased Simpson Index) were calculated using a two-sided Wilcoxon rank-sum test for two-group categorical variables (Response, irAE severity, Gender, Pre-treatment antibiotic use) and a Kruskal–Wallis test for multi-group categorical variables (Cancer Type). For the continuous variable (Age), statistical associations were determined using Spearman’s rank correlation, with Spearman’s rho () provided. *P* values for longitudinal alpha diversity changes (baseline vs. 3-month paired samples) were calculated using a two-sided Wilcoxon signed-rank test. *P* values for all beta diversity comparisons were calculated using Permutational Multivariate Analysis of Variance (PermANOVA) based on Aitchison distance. Statistically significant values (*P* < 0.05) are highlighted in yellow. R, responders; NR, non-responders; irAE, immune-related adverse event; NSCLC, non-small cell lung cancer; cSCC, cutaneous squamous cell carcinoma; HNC, head and neck cancer.

## Supplementary Table 16. Results of Wilcoxon rank-sum test on baseline gut microbial species abundance between responders and non-Responders

| **Taxon** | **Z Statistic** | **Log2FC** | **P Value** | **Enrich group** |
| --- | --- | --- | --- | --- |
| s__Enorma massiliensis | 4.212 | -7.180 | 0.000 | NR |
| s__Tyzzerella sp000411335 | 3.858 | -6.804 | 0.000 | NR |
| s__Faecalicatena gnavus | 3.676 | -11.779 | 0.000 | NR |
| s__Blautia hansenii | 3.288 | -5.529 | 0.001 | NR |
| s__Lactobacillus_C paracasei | 3.280 | -4.197 | 0.001 | NR |
| s__Megasphaera sp900066485 | 3.139 | -5.105 | 0.002 | NR |
| s__GCA-900066575 sp002160765 | 3.115 | -4.730 | 0.002 | NR |
| s__Blautia_A sp000433815 | 2.832 | -8.605 | 0.005 | NR |
| s__Lactobacillus_C rhamnosus | 2.759 | -4.408 | 0.006 | NR |
| s__Clostridium_M clostridioforme | 2.745 | -6.598 | 0.006 | NR |
| s__Agathobaculum sp900291975 | 2.703 | -5.344 | 0.007 | NR |
| s__Enterococcus faecalis | 2.694 | -4.311 | 0.007 | NR |
| s__CAG-145 MIC9742 | 2.662 | -3.535 | 0.008 | NR |
| s__Coprococcus_A catus | -2.651 | 6.605 | 0.008 | R |
| s__UBA1191 MIC6579 | 2.623 | -4.985 | 0.009 | NR |
| s__Faecalicatena contorta_B | 2.621 | -3.193 | 0.009 | NR |
| s__CAG-1427 sp000435475 | 2.594 | -4.668 | 0.009 | NR |
| s__Lactobacillus_H fermentum | 2.581 | -3.209 | 0.010 | NR |
| s__Parabacteroides gordonii | 2.581 | -3.421 | 0.010 | NR |
| s__Raoultibacter timonensis | 2.581 | -2.873 | 0.010 | NR |
| s__Lachnospirales MIC6978 | 2.542 | -2.741 | 0.011 | NR |
| s__Merdibacter MIC6953 | 2.513 | -4.251 | 0.012 | NR |
| s__Eubacterium_E sp900016875 | 2.486 | -4.827 | 0.013 | NR |
| s__Faecalibacterium MIC7145 | -2.481 | 6.692 | 0.013 | R |
| s__Acutalibacteraceae MIC6990 | 2.454 | -3.826 | 0.014 | NR |
| s__Dorea sp000509125 | 2.443 | -5.360 | 0.015 | NR |
| s__CAG-170 MIC8868 | 2.424 | -3.712 | 0.015 | NR |
| s__Blautia_A sp900066355 | -2.421 | 5.377 | 0.015 | R |
| s__Intestinimonas butyriciproducens | 2.361 | -4.313 | 0.018 | NR |
| s__Oscillibacter sp900066435 | 2.351 | -3.873 | 0.019 | NR |
| s__Sellimonas intestinalis | 2.343 | -5.299 | 0.019 | NR |
| s__Blautia_A sp000285855 | -2.339 | 5.356 | 0.019 | R |
| s__Holdemanella sp002299315 | -2.324 | 6.012 | 0.020 | R |
| s__Eubacterium_I ramulus | -2.305 | 7.931 | 0.021 | R |
| s__Anaerotignum sp000436415 | -2.226 | 4.780 | 0.026 | R |
| s__Hungatella_A MIC8772 | -2.226 | 4.659 | 0.026 | R |
| s__Dorea formicigenerans | -2.225 | 8.777 | 0.026 | R |
| s__GCA-900066135 MIC6659 | -2.182 | 5.475 | 0.029 | R |
| s__Eisenbergiella sp900066775 | -2.178 | 6.078 | 0.029 | R |
| s__Lactobacillus_H vaginalis_A | 2.134 | -2.549 | 0.033 | NR |
| s__Blautia_A sp900066205 | -2.127 | 4.630 | 0.033 | R |
| s__CAG-196 sp002102975 | -2.127 | 4.884 | 0.033 | R |
| s__UBA4285 MIC9245 | -2.127 | 4.103 | 0.033 | R |
| s__Faecalicatena glycyrrhizinilyticum | 2.125 | -5.690 | 0.034 | NR |
| s__Dorea longicatena_B | -2.102 | 5.603 | 0.036 | R |
| s__Eubacterium limosum_A | 2.098 | -2.726 | 0.036 | NR |
| s__Acutalibacter MIC8741 | 2.063 | -2.917 | 0.039 | NR |
| s__Lachnospiraceae MIC8643 | 1.993 | -2.591 | 0.046 | NR |
| s__Lawsonibacter sp900066825 | 1.991 | -4.812 | 0.047 | NR |
| s__Fusicatenibacter saccharivorans | -1.961 | 4.164 | 0.050 | R |

Note: This table details the 50 species identified as significantly differentially abundant in the baseline gut microbiome between subsequent responders (R, *n* = 49) and non-responders (NR, *n* = 14) based on a two-sided Wilcoxon rank-sum test (*P* < 0.05). The Z Statistic indicates directional abundance differences: a positive Z-statistic (Z > 0) denotes higher frequency in NR, while a negative Z-statistic (Z < 0) denotes higher frequency in R. Log2FC (Log2 fold change) was calculated using the geometric mean of relative abundances per group; a Log2FC > 0 indicates higher abundance in R, whereas a Log2FC < 0 indicates higher abundance in NR. The Enrich group column denotes the clinical cohort in which the taxon is more abundant.

## Supplementary Table 17. Results of LEfSe analysis on baseline gut microbial taxa abundance between responders and non-responders.

| **Taxon** | **Enrich group** | **LDA** |
| --- | --- | --- |
| s__Fusicatenibacter saccharivorans | R | 4.050 |
| g__ Holdemanella | R | 3.545 |
| s__Holdemanella sp002299315 | R | 3.503 |
| s__Faecalibacterium MIC7145 | R | 3.468 |
| f__ Lactobacillaceae | R | 3.394 |
| g__ Coprococcus_A | R | 3.258 |
| g__ Eubacterium_I | R | 3.257 |
| s__Eisenbergiella sp900066775 | R | 3.219 |
| f__ Butyricicoccaceae | R | 3.215 |
| s__Eubacterium_I ramulus | R | 3.194 |
| s__Coprococcus_A catus | R | 3.147 |
| o__ Gastranaerophilales | R | 3.145 |
| p__ Cyanobacteria | R | 3.142 |
| f__ Gastranaerophilaceae | R | 3.140 |
| c__ Vampirovibrionia | R | 3.135 |
| s__Dorea longicatena_B | R | 3.112 |
| s__Blautia_A sp900066205 | R | 3.062 |
| s__Dorea formicigenerans | R | 3.056 |
| g__ CAG-196 | R | 3.043 |
| s__CAG-196 sp002102975 | R | 3.041 |
| g__ GCA-900066135 | R | 3.014 |
| s__Dorea sp000509125 | NR | -3.063 |
| s__Oscillibacter sp900066435 | NR | -3.208 |
| f__ Enterococcaceae | NR | -3.215 |
| s__Enterococcus faecalis | NR | -3.217 |
| g__ Enterococcus | NR | -3.222 |
| f__ Megasphaeraceae | NR | -3.268 |
| g__ Megasphaera | NR | -3.270 |
| s__Megasphaera sp900066485 | NR | -3.270 |
| s__Blautia_A sp000433815 | NR | -3.405 |
| g__ Enorma | NR | -3.415 |
| s__Enorma massiliensis | NR | -3.418 |
| g__ Sellimonas | NR | -3.445 |
| s__Sellimonas intestinalis | NR | -3.445 |
| s__Faecalicatena gnavus | NR | -4.198 |

**Note:** This table lists the 35 hierarchical taxa identified as discriminative between responders (R, n = 49) and non-responders (NR, n = 14) at baseline. Linear discriminant analysis effect size (LEfSe) was performed based on the 50 significant species previously screened by the Wilcoxon rank-sum test (detailed in Supplementary Table 16), utilizing a logarithmic linear discriminant analysis (LDA) score threshold of > 3.0. The Taxon column incorporates standard prefixes to denote taxonomic rank (e.g., p__, phylum; c__, class; o__, order; f__, family; g__, genus; s__, species) for the significant species and their parent clades. The Enrich group column indicates the clinical cohort in which the taxon has a higher relative abundance. The LDA column displays the signed log10-transformed effect size score: positive values designate enrichment in responders, whereas negative values designate enrichment in non-responders.

## Supplementary Table 18. Results of univariate logistic regression and Fisher's exact test evaluating the association of LEfSe-derived baseline gut microbial species with clinical response.

| Univariate logistic regression | | | | | |
| --- | --- | --- | --- | --- | --- |
| **Taxon** | **Odds ratio** | **CI Lower** | **CI Upper** | **P Value** | **FDR** |
| s__Dorea formicigenerans | 1.266 | 1.103 | 1.453 | 0.001 | 0.014 |
| s__Enorma massiliensis | 0.692 | 0.548 | 0.873 | 0.002 | 0.017 |
| s__Faecalicatena gnavus | 0.743 | 0.612 | 0.903 | 0.003 | 0.017 |
| s__Blautia_A sp000433815 | 0.848 | 0.755 | 0.953 | 0.006 | 0.026 |
| s__Megasphaera sp900066485 | 0.763 | 0.619 | 0.939 | 0.011 | 0.034 |
| s__Eubacterium_I ramulus | 1.217 | 1.046 | 1.417 | 0.011 | 0.034 |
| s__Enterococcus faecalis | 0.803 | 0.670 | 0.961 | 0.017 | 0.042 |
| s__Dorea sp000509125 | 0.856 | 0.751 | 0.975 | 0.020 | 0.042 |
| s__Coprococcus_A catus | 1.187 | 1.026 | 1.373 | 0.021 | 0.042 |
| s__Faecalibacterium MIC7145 | 1.210 | 1.023 | 1.432 | 0.026 | 0.047 |
| s__Sellimonas intestinalis | 0.874 | 0.775 | 0.986 | 0.029 | 0.048 |
| s__Eisenbergiella sp900066775 | 1.218 | 1.004 | 1.476 | 0.045 | 0.068 |
| s__Oscillibacter sp900066435 | 0.578 | 0.333 | 1.003 | 0.051 | 0.071 |
| s__Dorea longicatena_B | 1.205 | 0.993 | 1.462 | 0.058 | 0.075 |
| s__Holdemanella sp002299315 | 1.382 | 0.909 | 2.102 | 0.130 | 0.156 |
| s__Blautia_A sp900066205 | 1.444 | 0.883 | 2.360 | 0.143 | 0.161 |
| s__Fusicatenibacter saccharivorans | 1.080 | 0.972 | 1.201 | 0.153 | 0.162 |
| s__CAG-196 sp002102975 | 1.497 | 0.828 | 2.706 | 0.182 | 0.182 |
| Fisher's exact test | | | |  |  |
| **Taxon** | **Odds ratio** | **P Value** | **FDR** |  |  |
| s__Faecalicatena gnavus | 0.000 | 0.000 | 0.000 |  |  |
| s__Enorma massiliensis | 0.030 | 0.000 | 0.002 |  |  |
| s__Dorea formicigenerans | 10.231 | 0.001 | 0.002 |  |  |
| s__Blautia_A sp000433815 | 0.125 | 0.002 | 0.006 |  |  |
| s__Eubacterium_I ramulus | 8.419 | 0.005 | 0.012 |  |  |
| s__Megasphaera sp900066485 | 0.056 | 0.007 | 0.015 |  |  |
| s__Enterococcus faecalis | 0.112 | 0.019 | 0.032 |  |  |
| s__Eisenbergiella sp900066775 | 8.734 | 0.024 | 0.035 |  |  |
| s__Faecalibacterium MIC7145 | 5.620 | 0.030 | 0.038 |  |  |
| s__Coprococcus_A catus | 4.769 | 0.032 | 0.038 |  |  |
| s__Dorea sp000509125 | 0.263 | 0.041 | 0.045 |  |  |
| s__Sellimonas intestinalis | 0.296 | 0.090 | 0.090 |  |  |

**Note:** This table presents a two-step statistical evaluation of 18 species, originally identified via LEfSe analysis, to assess their association with clinical response. The top section displays the results of univariate logistic regression performed on all 18 species, providing odds ratios, 95% confidence intervals (CI Lower, CI Upper), and unadjusted *P* values. The bottom section details the results of Fisher's exact test, which was subsequently performed on the 12 species that demonstrated significance (*P* < 0.05) in the initial logistic regression. For both statistical tests, false discovery rate (FDR) values were adjusted using the Benjamini–Hochberg method.

## Supplementary Table 19. Results of LEfSe analysis on baseline gut microbial taxa abundance between mild and severe immune-related adverse (irAE) group.

| **Taxon** | **Enrich group** | **LDA** | **P value** |
| --- | --- | --- | --- |
| g__ Erysipelatoclostridium | mild | 3.586 | 0.012 |
| s__Faecalicatena lactaris | mild | 3.475 | 0.028 |
| f__ CAG-508 | mild | 3.197 | 0.044 |
| o__ TANB77 | mild | 3.197 | 0.044 |
| s__Streptococcus thermophilus | mild | 3.194 | 0.049 |
| s__CAG-495 sp001917125 | mild | 3.079 | 0.049 |
| g__ Sellimonas | mild | 3.067 | 0.034 |
| s__Sellimonas intestinalis | mild | 3.063 | 0.034 |
| s__Eubacterium_E hallii_A | severe | -3.178 | 0.037 |
| s__Lachnospira sp000437735 | severe | -3.182 | 0.041 |
| s__Lawsonella clevelandensis | severe | -3.222 | 0.015 |
| s__Bacteroides faecis | severe | -3.269 | 0.044 |
| s__Bacteroides_A coprocola | severe | -3.370 | 0.001 |
| g__ Phascolarctobacterium_A | severe | -3.493 | 0.011 |
| s__Phascolarctobacterium_A succinatutens | severe | -3.499 | 0.007 |
| s__Catenibacterium sp000437715 | severe | -3.759 | 0.007 |
| g__ Catenibacterium | severe | -3.760 | 0.007 |
| s__Agathobacter rectale | severe | -4.123 | 0.024 |

**Note:** This table lists the 18 gut hierarchical taxa identified as discriminative between mild irAE (n = 53) and severe irAE (n = 10) group at baseline. Linear discriminant analysis effect size (LEfSe) was performed utilizing a Wilcoxon rank-sum test to identify significant differential abundance (*P* < 0.05), followed by linear discriminant analysis (LDA) to estimate the effect size of each differentially abundant taxon. Taxa listed met the significance threshold of an LDA score > 3.0. The Taxon column incorporates standard prefixes to denote taxonomic rank (e.g., p__, phylum; c__, class; o__, order; f__, family; g__, genus; s__, species) for the significant species and their parent clades. The Enrich group column indicates the clinical cohort in which the taxon has a higher relative abundance. The LDA column displays the signed log10-transformed effect size score: positive values designate enrichment in mild irAE group, whereas negative values designate enrichment in severe irAE group.

## Supplementary Table 20. Baseline oral microbial taxa abundant in severe immune-related adverse (irAE) group by LEfSe analysis

| **Taxon** | **Enrich group** | **LDA** | **P value** |
| --- | --- | --- | --- |
| g__ Filifactor | severe | -3.001 | 0.002 |
| g__ Oribacterium | severe | -3.003 | 0.024 |
| g__ Peptostreptococcus | severe | -3.017 | 0.026 |
| g__ Tannerella | severe | -3.019 | 0.003 |
| o__ Synergistales | severe | -3.041 | 0.000 |
| f__ Synergistaceae | severe | -3.042 | 0.000 |
| g__ Fretibacterium | severe | -3.042 | 0.000 |
| c__ Synergistia | severe | -3.042 | 0.000 |
| p__ Synergistota | severe | -3.043 | 0.000 |
| o__ Propionibacteriales | severe | -3.069 | 0.001 |
| f__ Propionibacteriaceae | severe | -3.069 | 0.001 |
| p__ Spirochaetota | severe | -3.204 | 0.001 |
| o__ Spirochaetales | severe | -3.204 | 0.001 |
| g__ Treponema | severe | -3.204 | 0.001 |
| c__ Spirochaetia | severe | -3.205 | 0.001 |
| f__ Spirochaetaceae | severe | -3.205 | 0.001 |
| g__ Corynebacterium | severe | -3.229 | 0.011 |
| o__ Corynebacteriales | severe | -3.230 | 0.010 |
| f__ Corynebacteriaceae | severe | -3.230 | 0.010 |
| f__ Peptostreptococcaceae | severe | -3.302 | 0.006 |
| g__ Atopobium | severe | -3.415 | 0.023 |
| f__ Anaerovoracaceae | severe | -3.423 | 0.015 |
| g__ Parvimonas | severe | -3.484 | 0.005 |
| f__ Peptostreptococcales-Tissierellales | severe | -3.504 | 0.002 |
| f__ Atopobiaceae | severe | -3.513 | 0.038 |
| c__ Coriobacteriia | severe | -3.529 | 0.037 |
| o__ Coriobacteriales | severe | -3.529 | 0.037 |
| f__ Fusobacteriaceae | severe | -3.721 | 0.022 |
| g__ Fusobacterium | severe | -3.721 | 0.022 |
| g__ Selenomonas | severe | -3.778 | 0.042 |
| f__ Selenomonadaceae | severe | -3.791 | 0.036 |
| o__ Peptostreptococcales-Tissierellales | severe | -3.894 | 0.005 |
| p__ Fusobacteriota | severe | -4.000 | 0.023 |
| c__ Fusobacteriia | severe | -4.000 | 0.023 |
| o__ Fusobacteriales | severe | -4.000 | 0.023 |
| c__ Clostridia | severe | -4.033 | 0.023 |
| p__ Actinobacteriota | severe | -4.203 | 0.049 |

**Note:** This table lists the 37 oral hierarchical taxa identified as discriminative between mild irAE (n = 61) and severe irAE (n = 12) group at baseline. Linear discriminant analysis effect size (LEfSe) was performed utilizing a Wilcoxon rank-sum test to identify significant differential abundance (*P* < 0.05), followed by linear discriminant analysis (LDA) to estimate the effect size of each differentially abundant taxon. Taxa listed met the significance threshold of an LDA score > 3.0. The Taxon column incorporates standard prefixes to denote taxonomic rank (e.g., p__, phylum; c__, class; o__, order; f__, family; g__, genus) for the significant species and their parent clades. The Enrich group column indicates the clinical cohort in which the taxon has a higher relative abundance. The LDA column displays the signed log10-transformed effect size score: the negative values designate all taxa are enriched in severe irAE group.

## Supplementary Table 21. Statistical associations of baseline and longitudinal oral microbial diversity with clinical response and patient metadata.

| Baseline | | | | |
| --- | --- | --- | --- | --- |
|  | Richness (S) p-value | Shannon Index (H) p-value | Unbiased_Simpson Index (Unbiased_D) p-value | PermANOVA |
| Response R (n = 56) NR (n = 17) | 0.14 | 0.41 | 0.58 | 0.73 |
| irAE severity Mild (n = 61) Severe (n = 12) | 0.01 | 0.03 | 0.12 | 0.12 |
| Gender Male (n = 48) Female (n = 25) | 0.28 | 0.54 | 0.96 | 0.014 |
| Pre-treatment antibiotic use  (past 3 months) Yes (n = 24) No (n = 49) | 0.93 | 0.67 | 0.37 | 0.41 |
| Age (29 - 85) (n = 73) | rho = -0.31 p = 0.008 | rho = -0.22 p = 0.065 | rho = 0.06 p = 0.58 | 0.11 |
| Cancer Type Melanoma (n = 30) NSCLC (n = 24) Renal (n = 8) cSCC (n = 9) HNC (n = 2) | 0.012 | 0.013 | 0.08 | 0.012 |
| Longitudinal change (baseline vs. 3-month samples) | | | | |
|  | Richness (S) p-value | Shannon Index (H) p-value | Unbiased_Simpson Index (Unbiased_D) p-value | PermANOVA |
| All patients (n = 52 pairs) | 0.15 | 0.13 | 0.27 | 0.35 |
| Responders (n = 45 pairs) | 0.09 | 0.19 | 0.35 | 0.49 |
| Non-responders (n = 7 pairs) | 0.72 | 0.31 | 0.61 | 0.98 |
| irAE_present (n = 28 pairs) | 0.45 | 0.32 | 0.5 | 0.88 |
| irAE_severe (n = 7 pairs) | 0.06 | 0.31 | 0.74 | 0.6 |
| Combined therapy (anti-PD-1 + anti-CTLA4) (n = 18 pairs) | 0.42 | 0.053 | 0.21 | 0.74 |

**Note:** *P* values for baseline alpha diversity (Richness, Shannon Index, and Unbiased Simpson Index) were calculated using a two-sided Wilcoxon rank-sum test for two-group categorical variables (Response, irAE severity, Gender, Pre-treatment antibiotic use) and a Kruskal–Wallis test for multi-group categorical variables (Cancer Type). For the continuous variable (Age), statistical associations were determined using Spearman’s rank correlation, with Spearman’s rho () provided. *P* values for longitudinal alpha diversity changes (baseline vs. 3-month paired samples) were calculated using a two-sided Wilcoxon signed-rank test. *P* values for all beta diversity comparisons were calculated using Permutational Multivariate Analysis of Variance (PermANOVA) based on Aitchison distance. Statistically significant values (*P* < 0.05) are highlighted in yellow. R, responders; NR, non-responders; irAE, immune-related adverse event; NSCLC, non-small cell lung cancer; cSCC, cutaneous squamous cell carcinoma; HNC, head and neck cancer.

## Supplementary Table 22. Differentially contributed per-cell functional features of the seven signature species.

| ***Coprococcus_A catus* (enriched in R; detected in 28 R, 3 NR)** | | | | |
| --- | --- | --- | --- | --- |
|  | **Feature ID** | **log2FC** | **P value** | **Enriched group** |
| Enzyme | 2.2.1.2 | 3.001 | 0.032 | R |
| 2.5.1.17 | 2.862 | 0.039 | R |
| 1.11.1.15 | 2.958 | 0.042 | R |
| 4.2.1.46 | 2.926 | 0.049 | R |
| 2.3.1.1 | -1.727 | 0.006 | NR |
| 2.4.1.1 | -1.246 | 0.007 | NR |
| 1.2.1.41 | -2.012 | 0.009 | NR |
| 2.3.1.35 | -1.726 | 0.011 | NR |
| 3.6.3.3 | -1.696 | 0.014 | NR |
| 1.5.3.1 | -1.179 | 0.026 | NR |
| 4.1.1.20 | -1.324 | 0.032 | NR |
| 2.7.14.1 | -1.385 | 0.034 | NR |
| 2.7.1.107 | -1.710 | 0.038 | NR |
| 2.7.1.66 | -1.710 | 0.038 | NR |
| 2.6.1.76 | -1.278 | 0.040 | NR |
| 3.1.26.11 | -1.285 | 0.048 | NR |
| Pathway | PWY-5723~Rubisco shunt | 2.992 | 0.031 | R |
| PWY-5154~L-arginine biosynthesis III (via N-acetyl-L-citrulline) | 3.649 | 0.039 | R |
| GLYSYN-THR-PWY~glycine biosynthesis IV | 2.055 | 0.048 | R |
|  |  |  |  |  |
| ***Dorea formicigenerans* (enriched in R; detected in 42 R, 5 NR)** | | | | |
|  | **Feature ID** | **log2FC** | **P value** | **Enriched group** |
| Enzyme | 2.5.1.72 | 1.556 | 0.012 | R |
| 6.2.1.3 | 2.650 | 0.021 | R |
| 2.4.2.21 | 1.390 | 0.033 | R |
| 1.5.3.1 | 1.695 | 0.042 | R |
| 6.3.1.20 | 0.994 | 0.048 | R |
| 3.5.4.5 | -1.076 | 0.031 | NR |
| 2.5.1.19 | -1.169 | 0.038 | NR |
| 7.3.2.1 | -1.062 | 0.046 | NR |
| Pathway | PWY-5143~long-chain fatty acid activation | 2.638 | 0.026 | R |
| Carbohydrate Degradation | -1.627 | 0.004 | NR |
|  |  |  |  |  |
| ***Eubacterium_I ramulus* (enriched in R; detected in 29 R, 2 NR)** | | | | |
|  | **Feature ID** | **log2FC** | **P value** | **Enriched group** |
| Enzyme | 2.1.1.72 | 4.982 | 0.026 | R |
| 3.1.21.3 | 4.130 | 0.032 | R |
| 2.4.1.25 | -2.532 | 0.021 | NR |
| 2.7.11.1 | -1.808 | 0.034 | NR |
| 2.4.1.1 | -1.821 | 0.035 | NR |
| 3.2.1.22 | -1.827 | 0.040 | NR |
| 3.4.21.53 | -2.030 | 0.047 | NR |
| Pathway | PWY0-1301~melibiose degradation | -1.827 | 0.042 | NR |
| Carbohydrate Degradation | -1.979 | 0.050 | NR |
|  |  |  |  |  |
| ***Faecalibacterium* MIC7145 (enriched in R; detected in 24 R, 2 NR)** | | | | |
|  | **Feature ID** | **log2FC** | **P value** | **Enriched group** |
| Enzyme | 3.2.1.86 | 3.309 | 0.002 | R |
| 2.4.2.22 | 4.304 | 0.004 | R |
| 3.2.1.122 | 3.040 | 0.004 | R |
| 4.2.1.6 | 2.729 | 0.008 | R |
| 5.3.1.17 | 2.708 | 0.009 | R |
| 6.3.5.4 | 1.536 | 0.010 | R |
| 2.1.1.133 | 3.210 | 0.011 | R |
| 5.4.99.25 | 2.098 | 0.014 | R |
| 5.4.2.2 | 2.151 | 0.015 | R |
| 5.4.2.8 | 2.151 | 0.015 | R |
| 3.2.1.22 | 4.785 | 0.022 | R |
| 3.2.2.9 | 1.750 | 0.024 | R |
| 5.4.2.10 | 1.673 | 0.028 | R |
| 1.1.1.42 | 1.611 | 0.029 | R |
| 4.1.1.36 | 1.331 | 0.030 | R |
| 6.3.2.5 | 1.331 | 0.030 | R |
| 5.1.99.6 | 3.491 | 0.031 | R |
| 3.2.1.135 | 1.484 | 0.033 | R |
| 5.1.3.13 | 2.148 | 0.040 | R |
| 6.3.4.4 | 1.233 | 0.046 | R |
| 2.7.7.85 | 1.568 | 0.050 | R |
| 2.7.7.49 | -5.505 | 0.001 | NR |
| 3.6.1.23 | -2.432 | 0.002 | NR |
| 3.5.4.33 | -1.465 | 0.002 | NR |
| 1.3.98.3 | -1.028 | 0.002 | NR |
| 1.3.99.22 | -1.028 | 0.002 | NR |
| 3.6.3.40 | -1.313 | 0.005 | NR |
| 2.7.1.6 | -0.975 | 0.016 | NR |
| 4.3.1.19 | -0.850 | 0.030 | NR |
| 7.6.2.11 | -0.850 | 0.037 | NR |
| 2.5.1.49 | -0.653 | 0.043 | NR |
| 4.4.1.11 | -0.653 | 0.043 | NR |
| 2.4.2.2 | -0.947 | 0.046 | NR |
| 2.4.2.4 | -0.947 | 0.046 | NR |
| Pathway | SALVPURINE2-PWY~xanthine and xanthosine salvage | 4.515 | 0.002 | R |
| ASPARAGINE-BIOSYNTHESIS~L-asparagine biosynthesis I | 1.543 | 0.007 | R |
| GLYCOGENSYNTH-PWY~glycogen biosynthesis I (from ADP-D-Glucose) | 1.098 | 0.019 | R |
| PWY0-1301~melibiose degradation | 4.785 | 0.022 | R |
| PWY-7400~L-arginine biosynthesis IV (archaebacteria) | 4.920 | 0.022 | R |
| PWY-5344~L-homocysteine biosynthesis | -0.623 | 0.038 | NR |
| Pathway group | Glycan Biosynthesis | 1.106 | 0.022 | R |
|  |  |  |  |  |
| ***Blautia_A* sp000433815(enriched in NR; detected in 15 R, 11 NR)** | | | | |
|  | **Feature ID** | **log2FC** | **P value** | **Enriched group** |
| Enzyme | 2.6.1.9 | 1.255 | 0.004 | R |
| 2.1.1.37 | 2.732 | 0.033 | R |
| 6.1.1.14 | -0.728 | 0.015 | NR |
| 2.7.8.26 | -0.687 | 0.023 | NR |
| 2.6.1.16 | -3.459 | 0.035 | NR |
| 5.4.3.8 | -0.627 | 0.046 | NR |
| 1.17.4.1 | -2.811 | 0.048 | NR |
|  |  |  |  |  |
| ***Enterococcus faecalis* (enriched in NR; detected in 2 R, 4 NR)** | | | | |
|  | **Feature ID** | **log2FC** | **P value** | **Enriched group** |
| Pathway group | Glycolysis | 6.483 | 0.002 | R |
|  |  |  |  |  |
| ***Faecalicatena gnavus* (enriched in NR; detected in 19 R, 14 NR)** | | | | |
|  | **Feature ID** | **log2FC** | **P value** | **Enriched group** |
| Enzyme | 2.1.1.148 | 2.756 | 0.002 | R |
| 5.1.3.1 | 0.606 | 0.004 | R |
| 5.1.3.2 | 0.792 | 0.004 | R |
| 2.7.1.15 | 0.667 | 0.009 | R |
| 3.1.21.3 | 2.290 | 0.020 | R |
| 3.2.1.169 | 1.872 | 0.025 | R |
| 2.7.1.60 | 2.873 | 0.041 | R |
| 3.6.3.40 | 1.418 | 0.049 | R |
| 2.7.11.1 | -0.611 | 0.007 | NR |
| 2.7.8.5 | -1.030 | 0.016 | NR |
| 6.3.4.5 | -0.533 | 0.030 | NR |
| 2.7.6.5 | -0.583 | 0.040 | NR |
| 2.1.3.15 | -0.540 | 0.040 | NR |
| 3.6.3.30 | -0.852 | 0.040 | NR |
| Pathway | PWY-7344~UDP-α-D-galactose biosynthesis | 0.795 | 0.004 | R |

**Note:** This table lists all functional features (enzymes, metabolic pathways, and pathway groups) that demonstrated significantly different per-cell output (*P* < 0.05) between response groups across the seven evaluable signature species (four taxonomically enriched in responders, three taxonomically enriched in non-responders). The block header for each species indicates its overarching taxonomic enrichment and its cohort prevalence (the absolute number of responder [R] and non-responder [NR] samples in which the species was detected). Absolute functional counts were modelled using DESeq2, incorporating species abundance as the library size factor to isolate functional shifts independent of total biomass. Positive log2 fold-change (log2FC) values denote functional features with upregulated per-cell output in responders, whereas negative log2FC values denote features with upregulated per-cell output in non-responders. Statistical significance (*P* value) was determined by DESeq2. R, responders; NR, non-responders. Of the originally identified 11 signature species, four were excluded from this per-cell analysis: *Dorea* sp000509125 lacked functional annotations, and *Enorma massiliensis*, *Megasphaera* sp900066485, and *Eisenbergiella* sp900066775 were excluded due to insufficient representation for meaningful differential inference (each was detected in only a single sample within either the R or NR group).

# References

1. Mahnke, Y.D. & Roederer, M. Optimizing a multicolor immunophenotyping assay. *Clinics in laboratory medicine* **27**, 469-485 (2007).

2. Berlier, J.E.*, et al.* Quantitative comparison of long-wavelength Alexa Fluor dyes to Cy dyes: fluorescence of the dyes and their bioconjugates. *Journal of Histochemistry & Cytochemistry* **51**, 1699-1712 (2003).

3. Hulspas, R., O'Gorman, M.R., Wood, B.L., Gratama, J.W. & Sutherland, D.R. Considerations for the control of background fluorescence in clinical flow cytometry. *Cytometry part b: Clinical cytometry: The journal of the international society for analytical cytology* **76**, 355-364 (2009).

4. Sagiv, J.Y.*, et al.* Phenotypic diversity and plasticity in circulating neutrophil subpopulations in cancer. *Cell reports* **10**, 562-573 (2015).

5. Mahnke, Y.D., Beddall, M.H. & Roederer, M. OMIP-015: human regulatory and activated T-cells without intracellular staining. *Cytometry a* **83**, 179-181 (2013).

6. Vivier, E., Tomasello, E., Baratin, M., Walzer, T. & Ugolini, S. Functions of natural killer cells. *Nature immunology* **9**, 503-510 (2008).

7. Polak, D. & Bohle, B. Neutrophils-typical atypical antigen presenting cells? *Immunology Letters* **247**, 52-58 (2022).

8. Villani, A.-C.*, et al.* Single-cell RNA-seq reveals new types of human blood dendritic cells, monocytes, and progenitors. *Science* **356**, eaah4573 (2017).

9. Dutertre, C.-A.*, et al.* Single-cell analysis of human mononuclear phagocytes reveals subset-defining markers and identifies circulating inflammatory dendritic cells. *Immunity* **51**, 573-589. e578 (2019).

10. Bourdely, P.*, et al.* Transcriptional and functional analysis of CD1c+ human dendritic cells identifies a CD163+ subset priming CD8+ CD103+ T cells. *Immunity* **53**, 335-352. e338 (2020).

11. Yin, X.*, et al.* Human blood CD1c+ dendritic cells encompass CD5high and CD5low subsets that differ significantly in phenotype, gene expression, and functions. *The Journal of Immunology* **198**, 1553-1564 (2017).

12. He, M.*, et al.* CD5 expression by dendritic cells directs T cell immunity and sustains immunotherapy responses. *Science* **379**, eabg2752 (2023).

13. Lee, J., Kuchen, S., Fischer, R., Chang, S. & Lipsky, P.E. Identification and characterization of a human CD5+ pre-naive B cell population. *The Journal of Immunology* **182**, 4116-4126 (2009).

14. Gary-Gouy, H.*, et al.* Human CD5 promotes B-cell survival through stimulation of autocrine IL-10 production. *Blood, The Journal of the American Society of Hematology* **100**, 4537-4543 (2002).

15. Sarvaria, A., Madrigal, J.A. & Saudemont, A. B cell regulation in cancer and anti-tumor immunity. *Cellular & molecular immunology* **14**, 662-674 (2017).

16. Bronte, V.*, et al.* Recommendations for myeloid-derived suppressor cell nomenclature and characterization standards. *Nature communications* **7**, 12150 (2016).

17. Veglia, F., Sanseviero, E. & Gabrilovich, D.I. Myeloid-derived suppressor cells in the era of increasing myeloid cell diversity. *Nature Reviews Immunology* **21**, 485-498 (2021).
